# Supplementary material for: Mechanistic insights into transcriptional regulation of ARHGAP36 expression identify a factor predictive of neuroblastoma survival
Source: eLife journal article supplement (doi:10.7554/elife.108827), 2025-10-31
Supplement: app1-fig2-data1 [file Figure S2-source data 1.pdf › Figure S2-source data 1.pdf]

**Figure S2C:**

3T3-L1 preadipocytes:

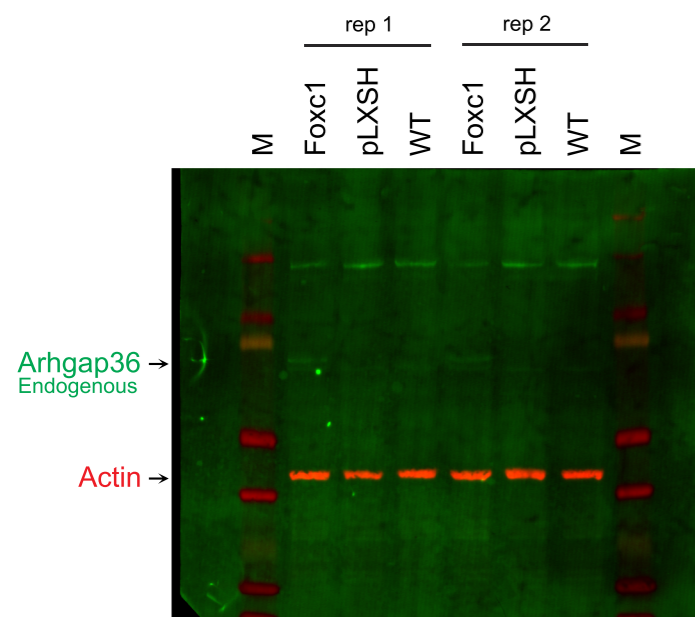

3T3-L1 preadipocytes:

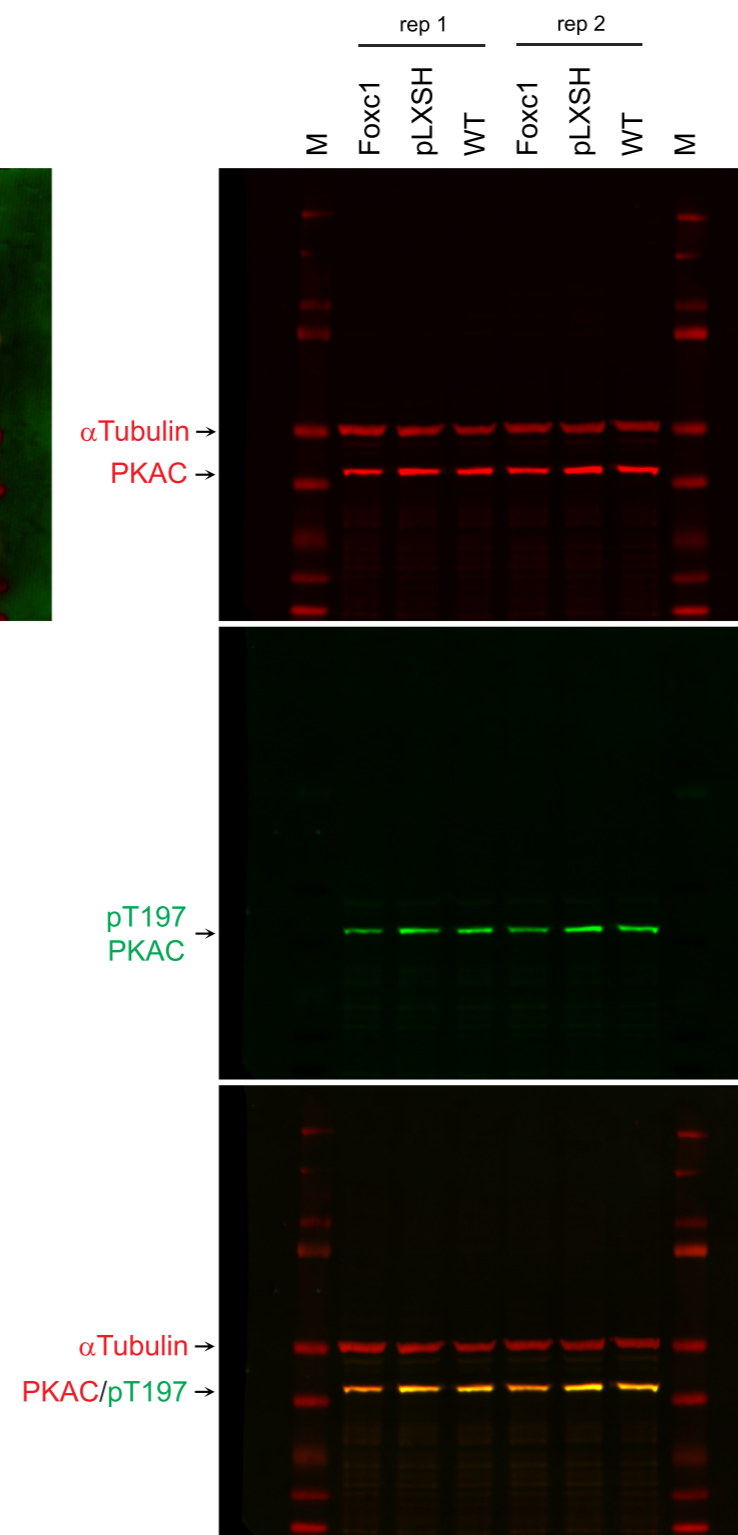**Figure S2D:**

3T3-L1 preadipocytes:

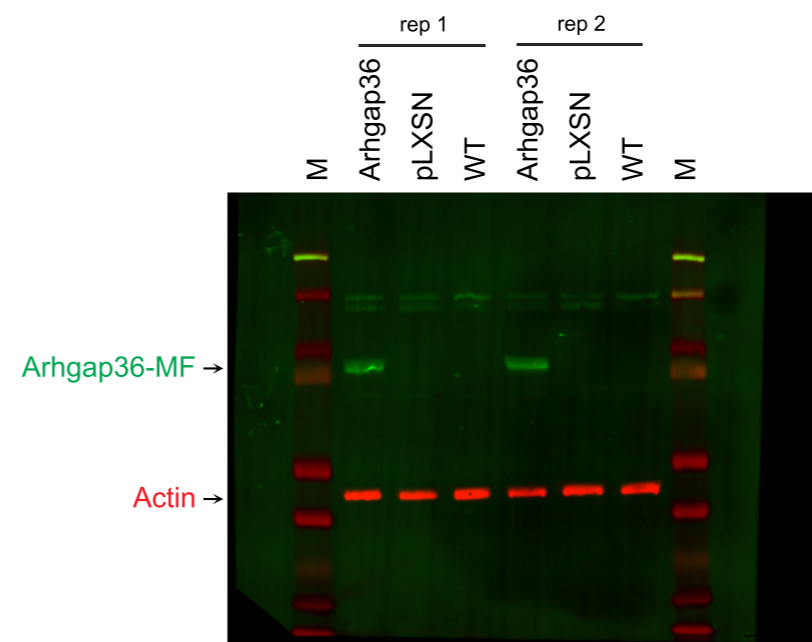

3T3-L1 preadipocytes:

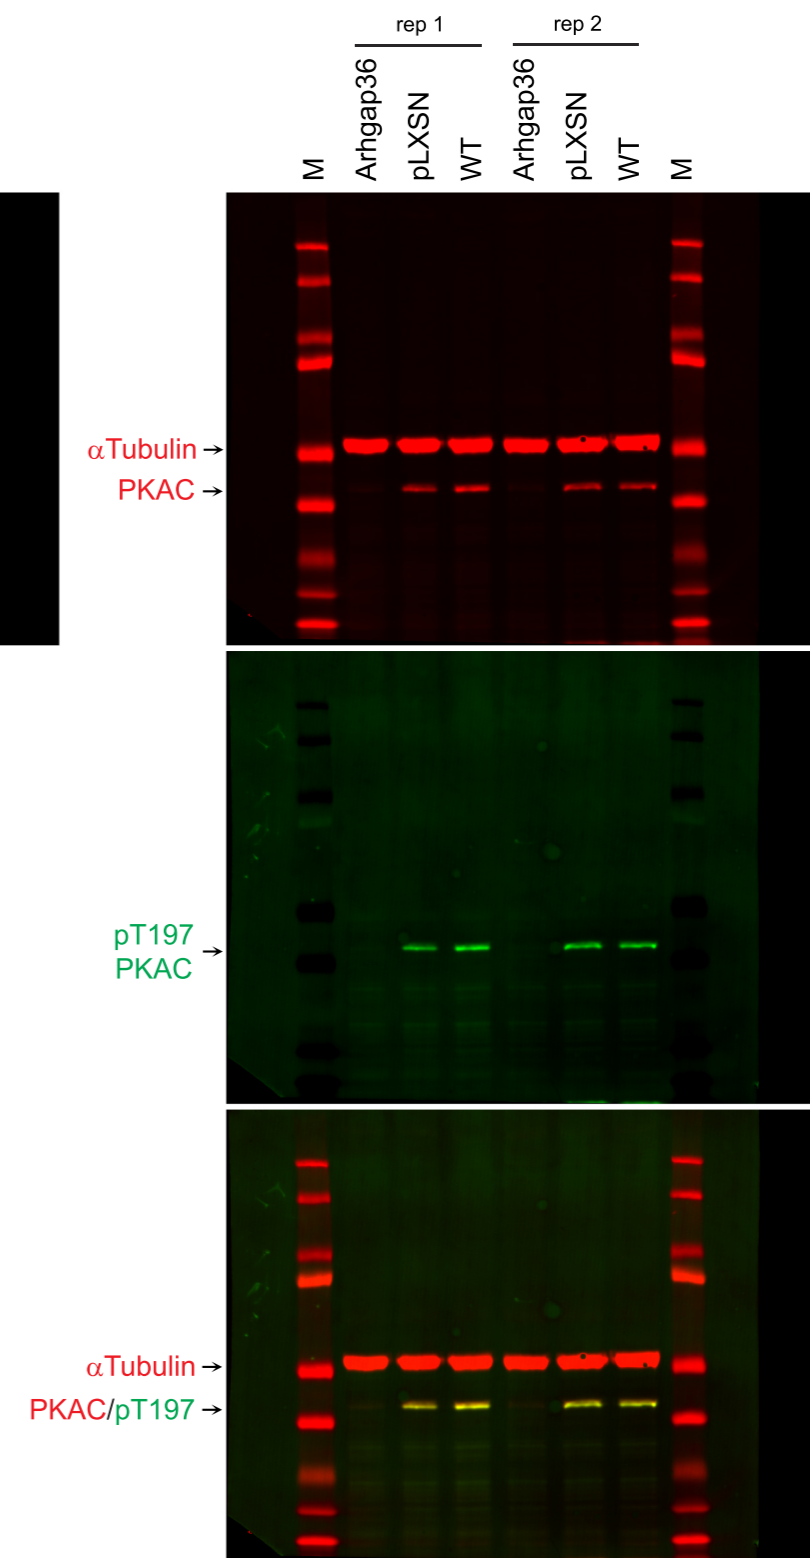

Markers (M):

- 250 kDa
- 150 kDa
- 100 kDa
- 75 kDa
- 50 kDa
- 37 kDa
- 25 kDa
- 20 kDa
- 15 kDa
