# Supplementary material for: Mechanistic insights into transcriptional regulation of ARHGAP36 expression identify a factor predictive of neuroblastoma survival
Source: eLife. 2026 Jul 6;14:RP108827. doi: 10.7554/eLife.108827 (PMC13336777; doi:10.7554/eLife.108827)
Supplement: Supplementary file 1. — Table A. List of differentially expressed genes in NIH3T3 cells expressing Foxc1 or pLXSH empty vector control. Complete list of differentially expressed genes identified in NIH3T3 cells expressing Foxc1 or empty vector control [pLXSH] by RNA-sequencing (n = 3) and used for volcano plot (Figure 1A). n = 292 differentially expressed genes; 195 upregulated, 97 downregulated. Selection criteria: q-value (FDR-adjusted p-value) ≤0.01, absolute log2 ratio ≥1, signal cut-off ≥1 FPKM in either condition. Table B. Functional profiling of the list of differentially expressed genes from File S1. Functional profiling of the list of genes differentially expressed in Foxc1-expressing NIH3T3 cells vs empty vector control [pLXSH] was performed using gene set enrichment analysis (GSEA) platform Enrichr [https://maayanlab.cloud/Enrichr/]. The list was analyzed against multiple gene set libraries and databases. Results demonstrate significant associations between differentially expressed genes and molecular pathways/biological processes/pathological conditions with previous implication of Foxc1, as well as Foxc1-specific cell and tissue expression. Overall, these results indicate that ectopic expression of Foxc1 in NIH3T3 affects functionally relevant targets. Examples include association with ocular and vascular disease [glaucoma p = 5.8 × 10–4; intraocular pressure p = 5.9 × 10–3; hypertension p = 5.7 × 10–4; myocardial ischemia p = 2.4 × 10–4; coronary artery disease p = 0.01], vascular development [regulation of angiogenesis p = 9.4 × 10–5], bone development [endochondral ossification 2.8 × 10–4], a number of mouse skeletal and renal phenotypes [MGI phenotypes]; multiple cancers and cancer invasiveness phenotypes [epithelial mesenchymal transition p = 7.7 × 10–11]. Relevant cell and tissue expression signatures [mesenchyme p = 3.4 × 10–8; mesenchymal stem cells p = 5.8 × 10–4; (mesenchymal) stromal cells p = 1.8 × 10–6; vasculature p = 2.7 × 10–5; neural crest p = 3.8 × 10–4; seve [file elife-108827-supp1.xlsx]

## Sheet: Table A. Hh related genes
Table A. List of differentially expressed genes in NIH3T3 cells expressing Foxc1 or pLXSH empty vector control.
Differentially expressed genes with known roles as either targets (t) or regulators (r) of the Hh signalling pathway:
			DESeq2:		CuffDiff:		Role	References / Pubmed IDs
#	Gene	Locus	log2 ratio	q value	log2 ratio	q value
1	Arhgap36	chrX:49470449-49500250	11.2152	1.31341e-19	12.78	0.000483	r	Rack et al., 2014 (PMID: 25024229)
2	Wnt2	chr6:17988939-18030445	5.86434	6.45096e-41	5.82	0.000483	t	Rankin et al., 2016 (PMID: 27320915)
3	Col10a1	chr10:34303611-34418528	4.56489	0	4.59	0.000483	t	Koyama et al., 2007 (PMID: 17507416); Yoshida et al., 2015 (PMID: 25808752); Amano et al., 2014 (PMID: 25028519)
4	Ogn	chr13:49464058-49652731	3.71502	0	3.71	0.000483	t,r	Lin et al., 2023 (PMID: 36515316); Huang et al., 2013 (PMID: 23645682); Lu et al., 2015 (PMID: 26597826)
5	Krt15	chr11:100131758-100135949	3.20138	5.06841e-24	3.18	0.000483	t	Rittie et al., 2009 (PMID: 20050020); Garcia-Zaragoza et al., 2012 (PMID: 23000969).
6	Rspo2	chr15:43020794-43170818	3.15321	4.42533e-46	3.19	0.000483	r	Sam et al., 2007 (PMID: 17904116); Aoki et al., 2008 (PMID: 18067586); Wang et al., 2021 (PMID: 34273374)
7	Sulf1	chr1:12692429-12860372	2.84512	1.03621e-136	2.85	0.000483	r	Danesin et al., 2006 (PMID: 16687495); Wojcinski et al., 2011 (PMID: 21806980); Jiang et al., 2017 (PMID: 28490013)
8	Pkia	chr3:7366603-7445365	2.49534	9.68959e-80	2.52	0.000483	r	Via regulation of PKA. Hoy et al., 2020 (PMID: 32830375); Kawakami and Nakanishi, 2001 (PMID: 11493567); Hammerschmidt et al., 1996 (PMID: 8598293)
9	Gdf5	chr2:155941024-155945364	2.2693	3.45189e-40	2.28	0.000483	t,r	Koyama et al., 2007 (PMID: 18083924); Niedermaier et al., 2005 (PMID: 15841179); Craft et al., 2013 (PMID: 23715552)
10	Col11a1	chr3:114030539-114220326	2.23582	9.04401e-133	2.23	0.000483	t	Delaine-Smith et al., 2021 (PMID: 34189438); Feldman et al., 2008 (PMID: 18515410)
11	Enpp2	chr15:54838678-54920146	2.0559	1.44596e-17	2.06	0.000483	r	Frisca et al., 2016 (PMID: 27883058)
12	Maf	chr8:115703252-115706894	1.87884	5.6787e-27	1.87	0.000483	t	Kerr et al., 2012 (PMID: 22491411). Essential for lens formation and osteoblast dfifferentiation (PMID: 33762508).
13	Mtss1	chr15:58941233-59082026	1.83015	1.72403e-11	1.86	0.000483	r	Drummond et al., 2018 (PMID: 29945904); Bershteyn et al., 2010 (PMID: 20708589)
14	Tgfb2	chr1:186623185-186705992	1.70849	3.12744e-50	1.71	0.000483	t,r	Rowan et al., 2018 (PMID: 29945868); Alvarez et al., 2002 (PMID: 11934857); Tang et al., 2018 (PMID: 29891662)
15	Sfrp1	chr8:23411501-23449632	1.68962	1.52634e-82	1.69	0.000483	t	Borday et al., 2012 (PMID: 22899850); Gomes et al., 2014 (PMID: 24712566)
16	Ahr	chr12:35497978-35534989	1.68187	6.54295e-114	1.68	0.000483	r	Flegel et al., 2022 (PMID: 36459434)
17	Rnf43	chr11:87663086-87735539	1.67977	2.2291e-29	1.61	0.000483	r	Wang et al., 2021 (PMID: 34273374)
18	Lhx8	chr3:154306293-154330560	1.64966	4.48182e-16	1.65	0.000483	r	Flandin et al., 2011 (PMID: 21658586)
19	Fst	chr13:114452261-114458951	1.5916	5.15569e-16	1.6	0.000483	t	Eichberger et al., 2008 (PMID: 18319260); Son et al., 2015 (PMID: 25775517); Muthu et al., 2019 (PMID: 31488567)
20	Adgrg6	chr10:14402584-14545036	1.58208	1.58763e-20	1.62	0.000483	r	Cui et al., 2021 (PMID: 33629464 ); Bian et al., 2024 (PMID: 39236220)
21	Klf4	chr4:55527136-55532475	1.56872	1.96431e-104	1.57	0.000483	r,t	Takeuchi et al., 2018 (PMID: 30193838); Zeng et al., 2016 (PMID: 27237094)
22	Rbp1	chr9:98422960-98446550	1.5246	6.85207e-104	1.51	0.000483	t	Hager-Theodorides et al., 2009 (PMID: 19667090)
23	Thrb	chr14:17660959-18038088	1.48945	7.78201e-29	1.48	0.000483	t	Ostasov et al., 2020 (PMID: 32456161)
24	Smoc2	chr17:14279505-14404790	1.31946	1.03504e-45	1.32	0.000483	t	Pazin and Albrecht, 2009 (PMID: 19842175); Lu et al., 2015 (PMID: 26597826)
25	Gpc1	chr1:92831685-92860196	1.27074	1.10313e-100	1.27	0.000483	r	Wilson and Stoecki, 2013 (PMID: 23931997); Aguirre-Tamaral et al., 2022 (PMID: 36163184)
26	Grk5	chr19:60889748-61140840	1.26571	1.94341e-23	1.28	0.000483	r	Franco et al., 2018 (PMID: 29969579)
27	Tgm2	chr2:158116404-158146392	1.21589	1.81475e-23	1.21	0.000483	r	Shi et al., 2021 (PMID: 33245424)
28	Chrd	chr16:20724453-20742384	1.20563	1.75684e-13	1.2	0.000483	t	Mouri et al., 2018 (PMID: 29255029)
29	Slit2	chr5:47983154-48306282	1.20392	1.04867e-53	1.2	0.000483	t	Barresi et al., 2005 (PMID: 16033800); Farmer et al., 2008 (PMID: 18842816);
30	Gli1	chr10:127321963-127341579	1.20339	2.11484e-05	1.23	0.000483	r	Kopinke et al., 2021 (PMID: 32540122)
31	Irs1	chr1:82233104-82291439	1.16026	2.34828e-49	1.16	0.000483	t	Sui et al., 2024 (PMID: 38775809); Parathath et al., 2008 (PMID: 18755774)
32	Kif13b	chr14:64652530-64806296	1.13658	1.76567e-23	1.15	0.000483	r	Schou et al., 2017 (PMID: 28134340); Morthorst et al., 2022 (PMID: 35673984)
33	Arrb1	chr7:99535485-99606771	1.12646	2.94299e-18	1.14	0.000483	r	Kovacs et al., 2008 (PMID: 18497258); Parathath et al., 2010 (PMID: 20935513); Miele et al., 2017 (PMID: 28716052)
34	Angpt1	chr15:42424666-42676977	1.08623	2.05594e-13	1.09	0.000483	t	Nakamura et al., 2010 (PMID: 20098680); Kim et al., 2014 (PMID: 24807580)
35	Ddr1	chr17:35681566-35704139	1.0638	2.618e-42	1.07	0.000483	r	Villegas Villarroel et al., 2024 (PMID: 39714220)
36	Thbs1	chr2:118111921-118127133	1.04618	6.62391e-55	1.05	0.000483	r	Wang et al., 2013 (PMID: 24148348)
37	Dock4	chr12:40446052-40846488	1.01757	8.45819e-11	1.03	0.000483	r	Makihara et al., 2018 (PMID: 30078728)
38	Cx3cl1	chr8:94772179-94782426	-1.04703	6.28649e-38	-1.05	0.000483	t	Giammona et al., 2024 (PMID: 39090759)
39	Notch1	chr2:26457901-26503822	-1.05879	6.67046e-18	-1.05	0.000483	r	Stasiulewicz et al., 2015 (PMID: 25995356)
40	Foxs1	chr2:152931897-152933208	-1.07568	0.000269378	-1.07	0.000483	t	Diao et al., 2018 (PMID: 30098229); Wang et al., 2019 (PMID: 30918291)
41	Il11	chr7:4772377-4782857	-1.08805	2.30331e-19	-1.08	0.000483	t	Li et al., 2023 (PMID: 36853961)
42	Sox5	chr6:143828424-144209568	-1.10819	2.5967e-22	-1.13	0.000483	t	Hojo et al., 2013 (PMID: 23423383)
43	Abcg2	chr6:58596671-58692451	-1.16411	6.59115e-33	-1.18	0.000483	t	Xu et al., 2015 (PMID: 26276718); Yu et al., 2017 (PMID: 28847472); Kukal et al., 2021 (PMID: 34586444)
44	Mmp9	chr2:164948218-164955849	-1.18742	4.11101e-08	-1.2	0.000483	t	Faiao-Flores et al., 2016 (PMID: 27748762)
45	Foxl1	chr8:121127684-121130644	-1.20955	1.18351e-07	-1.19	0.000483	t	Madison et al., 2009 (PMID: 19049965)
46	Mycn	chr12:12936092-12941836	-1.2863	6.8475e-11	-1.28	0.000483	t	Singh et al., 2018 (PMID: 30315164); Wickstrom et al., 2013 (PMID: 22949014); Oliver et al., 2003 (PMID: 12777630)
47	Eya1	chr1:14168957-14310199	-1.4424	1.07474e-14	-1.44	0.000483	r	Eisner et al., 2015 (PMID: 25816987)
48	Grpr	chrX:163513903-163549736	-1.51615	7.18955e-10	-1.51	0.000483	r	Castellone et al., 2015 (PMID: 24747971)
49	Spp1	chr5:104435110-104441053	-1.55148	2.6214e-166	-1.54	0.000483	t	Iwaya et al., 2024 (PMID: 38086515); Hou et al., 2021 (PMID: 33314622)
50	Sulf2	chr2:166073898-166155683	-1.65373	8.77897e-31	-1.65	0.000483	r	Nakamura et al., 2013 (PMID: 23740243); Jiang et al., 2017 (PMID: 28490013)
51	Rgcc	chr14:79288749-79301635	-1.73082	3.57585e-12	-1.74	0.000483	t	Zhao et al., 2023 (PMID: 37552059)
52	H19	chr7:142575529-142578146	-1.73264	1.08621e-57	-1.74	0.000483	t	Chan et al., 2014 (PMID: 24141783)
53	Cxcl1	chr5:90891244-90893115	-1.74184	7.80193e-05	-1.71	0.000483	t	Zaki et al., 2022 (PMID: 35388502)
54	Tnc	chr4:63959784-64047015	-1.76153	1.49558e-115	-1.76	0.000483	t	Ohki et al., 2020 (PMID: 32581832)
55	Has2	chr15:56665626-56694546	-1.79856	8.74712e-102	-1.8	0.000483	t	Liu et al., 2013 (PMID: 23313125)
56	Dcn	chr10:97479499-97518162	-1.86953	1.22049e-164	-1.87	0.000483	t	Montano et al., 2018 (PMID: 29368411)
57	Crabp1	chr9:54764747-54773110	-1.91808	9.80504e-124	-1.92	0.000483	t	Lin et al., 2020 (PMID: 32527063)
58	Serpine2	chr1:79794320-79858665	-1.96637	3.53909e-122	-1.97	0.000483	r	Vaillant et al., 2007 (PMID: 17409116); Vaillant et al., 2015 (PMID: 25901736)
59	Sfrp2	chr3:83766320-83774314	-2.27087	7.72735e-131	-2.27	0.000483	t	Ingram et al., 2002 (PMID: 12444557); Tavella et al., 2006 (PMID: 16962305); Lu et al., 2015 (PMID: 26597826)
60	Igf1	chr10:87859055-87937047	-2.60718	2.73611e-59	-2.8	0.000483	t	Lu et al., 2015 (PMID: 26597826); Nakamura et al., 2010 (PMID: 20098680)
61	Sparcl1	chr5:104079108-104114088	-3.39491	3.70217e-159	-3.4	0.000483	t	Le et al., 2025 (PMID: 39900499)
62	Vip	chr10:5639217-5647614	-4.23628	4.24903e-88	-4.22	0.000483	r	Bensalma et al., 2019 (PMID: 30669581)

## Sheet: Table A. CuffDiff
Table A. List of differentially expressed genes in NIH3T3 cells expressing Foxc1 or pLXSH empty vector control.
CuffDiff results:
Selection criteria: q-value (FDR-adjusted p-value) ≤ 0.01, absolute log2 ratio ≥ 1, CuffLinks signal cut-off ≥ 1 FPKM in either condition.
#	Gene	Locus	Status	log2 FPKM pLXSH	log2 FPKM Foxc1	log2 ratio	q value	p value
1	Anxa10	chr8:62057041-62123193	OK	-10	2.79	12.79	0.000483	5e-05
2	Arhgap36	chrX:49470449-49500250	OK	-10	2.78	12.78	0.000483	5e-05
3	Kng1	chr16:23058299-23082078	OK	-10	1.47	11.47	0.000483	5e-05
4	E330011O21Rik	chr16:78250862-78255454	OK	-10	0.94	10.94	0.000483	5e-05
5	Glra3	chr8:55940824-56125352	OK	-10	0.09	10.09	0.000483	5e-05
6	Vnn1	chr10:23894687-23905343	OK	-2.22	4.2	6.42	0.000483	5e-05
7	Akr1c18	chr13:4132626-4150631	OK	-1.24	4.65	5.89	0.000483	5e-05
8	Wnt2	chr6:17988939-18030445	OK	-3.26	2.57	5.82	0.000483	5e-05
9	Il33	chr19:29925113-29960715	OK	-4.06	1.05	5.11	0.00287	0.00035
10	Itih2	chr2:10094590-10130683	OK	-2.2	2.68	4.88	0.000483	5e-05
11	Agt	chr8:124556586-124569707	OK	-2.03	2.84	4.87	0.000483	5e-05
12	Foxc1	chr13:31806645-31810635	OK	2.11	6.97	4.86	0.000483	5e-05
13	Col10a1	chr10:34303611-34418528	OK	0.34	4.93	4.59	0.000483	5e-05
14	Il20ra	chr10:19712586-19760053	OK	-1.57	2.54	4.1	0.000483	5e-05
15	Ogn	chr13:49464058-49652731	OK	2.51	6.23	3.71	0.000483	5e-05
16	Slc4a4	chr5:88887259-89239656	OK	-3.33	0.3	3.63	0.000483	5e-05
17	Apba1	chr19:23758875-23949597	OK	0.17	3.75	3.58	0.000483	5e-05
18	Ifit3b	chr19:34607956-34613401	OK	-3.43	0.1	3.53	0.00494	0.00065
19	Itgbl1	chr14:123660139-123974079	OK	0.67	4.16	3.49	0.000483	5e-05
20	Itga1	chr13:114958080-115101964	OK	-1.16	2.19	3.35	0.000483	5e-05
21	Ifi47	chr11:49037659-49135387	OK	-2.73	0.57	3.3	0.000483	5e-05
22	Camk1g	chr1:193346345-193370282	OK	-2.19	1.1	3.29	0.000483	5e-05
23	Hid1	chr11:115347708-115367719	OK	-0.24	3	3.24	0.000483	5e-05
24	Rspo2	chr15:43020794-43170818	OK	-1.33	1.85	3.19	0.000483	5e-05
25	Krt15	chr11:100131758-100135949	OK	-1.38	1.8	3.18	0.000483	5e-05
26	Pdk4	chr6:5483350-5496278	OK	2.66	5.83	3.17	0.000483	5e-05
27	Fam20a	chr11:109672925-109722256	OK	0.17	3.22	3.05	0.000483	5e-05
28	Nlrp2	chr7:5298546-5360682	OK	-2.48	0.48	2.96	0.000483	5e-05
29	Myh14	chr7:44605802-44670843	OK	-2.5	0.36	2.86	0.000483	5e-05
30	Sulf1	chr1:12692429-12860372	OK	0.5	3.35	2.85	0.000483	5e-05
31	C430002N11Rik	chr9:96765561-96774397	OK	-2.6	0.24	2.84	0.000483	5e-05
32	Rasgef1b	chr5:99217419-99252927	OK	-1.72	1.09	2.81	0.000483	5e-05
33	Omd	chr13:49464058-49652731	OK	0.1	2.9	2.8	0.000483	5e-05
34	Pgbd5	chr8:124369048-124433936	OK	-0.09	2.7	2.78	0.000483	5e-05
35	Scara5	chr14:65666402-65764826	OK	-1.79	0.97	2.76	0.000483	5e-05
36	Dio2	chr12:90724551-90738438	OK	1.18	3.9	2.73	0.000483	5e-05
37	Ifit3	chr19:34583528-34588982	OK	-2.02	0.7	2.72	0.000483	5e-05
38	Napsa	chr7:44572444-44586846	OK	-2	0.53	2.53	0.000483	5e-05
39	Pkia	chr3:7366603-7445365	OK	0.86	3.38	2.52	0.000483	5e-05
40	Srpx2	chrX:133908424-133932446	OK	-0.33	2.14	2.48	0.000483	5e-05
41	Plscr2	chr9:92275601-92297752	OK	-0.69	1.76	2.46	0.000483	5e-05
42	Adra1b	chr11:43774604-43901237	OK	-1.17	1.21	2.38	0.000483	5e-05
43	Aldh3a1	chr11:61208741-61218416	OK	1.34	3.63	2.3	0.000483	5e-05
44	Gdf5	chr2:155941024-155945364	OK	0.3	2.58	2.28	0.000483	5e-05
45	Col11a1	chr3:114030539-114220326	OK	1.03	3.27	2.23	0.000483	5e-05
46	Ror1	chr4:100095790-100442545	OK	0.69	2.85	2.16	0.000483	5e-05
47	8430408G22Rik	chr6:116633007-116673836	OK	-1.76	0.39	2.15	0.00174	0.0002
48	Nr3c2	chr8:76902507-77243639	OK	-1.94	0.21	2.15	0.000483	5e-05
49	Tpd52l1	chr10:31332379-31445921	OK	-1.39	0.75	2.14	0.000483	5e-05
50	C1qtnf1	chr11:118428456-118454995	OK	-0.08	2.05	2.12	0.000483	5e-05
51	Postn	chr3:54361106-54391041	OK	4.91	7	2.09	0.000483	5e-05
52	Enpp2	chr15:54838678-54920146	OK	-1.1	0.96	2.06	0.000483	5e-05
53	Sorcs2	chr5:36017180-36398139	OK	-0.17	1.83	1.99	0.000483	5e-05
54	Adamts6	chr13:104287872-104494763	OK	-0.95	0.98	1.93	0.000483	5e-05
55	Maf	chr8:115703252-115706894	OK	-0.13	1.74	1.87	0.000483	5e-05
56	Aspg	chr12:112106682-112127573	OK	0.13	1.99	1.86	0.000483	5e-05
57	Fhl1	chrX:56731760-56793346	OK	-1.72	0.14	1.86	0.000483	5e-05
58	Mtss1	chr15:58941233-59082026	OK	-1.83	0.03	1.86	0.000483	5e-05
59	Wisp2	chr2:163820833-163833147	OK	4.81	6.61	1.8	0.000483	5e-05
60	Kcnh5	chr12:74897216-75177332	OK	-1.23	0.55	1.77	0.000483	5e-05
61	Fam213a	chr14:40993739-41013775	OK	2.65	4.39	1.74	0.000483	5e-05
62	Vamp5	chr6:72368048-72380468	OK	1.35	3.08	1.73	0.000483	5e-05
63	Msln	chr17:25748612-25754327	OK	2.33	4.05	1.72	0.000483	5e-05
64	Tgfb2	chr1:186623185-186705992	OK	0.83	2.54	1.71	0.000483	5e-05
65	Aspn	chr13:49464058-49652731	OK	3.9	5.59	1.69	0.000483	5e-05
66	Fjx1	chr2:102449365-102451792	OK	-0.63	1.06	1.69	0.000483	5e-05
67	Sfrp1	chr8:23411501-23449632	OK	2.49	4.18	1.69	0.000483	5e-05
68	Ahr	chr12:35497978-35534989	OK	2.75	4.44	1.68	0.000483	5e-05
69	Lhx8	chr3:154306293-154330560	OK	0.38	2.03	1.65	0.000483	5e-05
70	Loxl4	chr19:42592278-42612806	OK	2.17	3.81	1.64	0.000483	5e-05
71	2610035D17Rik	chr11:113043905-113201838	OK	-0.23	1.4	1.63	0.000483	5e-05
72	Adgrg6	chr10:14402584-14545036	OK	-0.8	0.82	1.62	0.000483	5e-05
73	Gm14005	chr2:128298662-128429351	OK	1.57	3.19	1.62	0.000483	5e-05
74	Rnf43	chr11:87663086-87735539	OK	0.29	1.9	1.61	0.000483	5e-05
75	Fst	chr13:114452261-114458951	OK	0.06	1.66	1.6	0.000483	5e-05
76	Gadd45a	chr6:67035095-67080652	OK	3.01	4.62	1.6	0.000483	5e-05
77	2010111I01Rik	chr13:62964892-63431745	OK	2.79	4.37	1.58	0.000483	5e-05
78	Alcam	chr16:52248995-52452997	OK	3.05	4.63	1.58	0.000483	5e-05
79	Etl4	chr2:20289912-20810535	OK	0.17	1.75	1.58	0.000483	5e-05
80	Ly6a	chr15:74994876-74998031	OK	3.39	4.97	1.58	0.000483	5e-05
81	S100a16	chr3:90541222-90543151	OK	-0.74	0.84	1.58	0.000483	5e-05
82	Cped1	chr6:21985909-22255606	OK	2.76	4.33	1.57	0.000483	5e-05
83	Klf4	chr4:55527136-55532475	OK	3.4	4.97	1.57	0.000483	5e-05
84	Gjb4	chr4:127351085-127354081	OK	0.76	2.33	1.56	0.000483	5e-05
85	Brinp3	chr1:146495665-146902472	OK	0.92	2.46	1.55	0.000483	5e-05
86	Cyp1b1	chr17:79706952-79715041	OK	2.41	3.95	1.54	0.000483	5e-05
87	Mfap3l	chr8:60632824-60676731	OK	0.52	2.07	1.54	0.000483	5e-05
88	Ctgf	chr10:24595441-24598682	OK	6.6	8.13	1.53	0.000483	5e-05
89	Efnb2	chr8:8617438-8660773	OK	3.63	5.15	1.52	0.000483	5e-05
90	Rbp1	chr9:98422960-98446550	OK	4.78	6.29	1.51	0.000483	5e-05
91	Nrep	chr18:33437018-33464029	OK	2.45	3.96	1.5	0.000483	5e-05
92	Rerg	chr6:137054824-137170496	OK	0.2	1.69	1.49	0.000483	5e-05
93	Tmem176b	chr6:48833810-48841374	OK	0.65	2.14	1.49	0.000483	5e-05
94	Thrb	chr14:17660959-18038088	OK	0.42	1.9	1.48	0.000483	5e-05
95	Actr3b	chr5:25760025-25850341	OK	0.7	2.17	1.47	0.000483	5e-05
96	Dusp4	chr8:34807609-34819894	OK	1.16	2.63	1.47	0.000483	5e-05
97	Megf6	chr4:154170712-154275721	OK	-0.4	1.07	1.46	0.000483	5e-05
98	Rbp2	chr9:98490536-98509771	OK	-0.14	1.32	1.46	0.0025	0.0003
99	Tle4	chr19:14448071-14598183	OK	1.55	2.98	1.44	0.000483	5e-05
100	Cdsn	chr17:35552127-35557180	OK	3.26	4.69	1.43	0.000483	5e-05
101	Dusp1	chr17:26505590-26508472	OK	2.98	4.39	1.41	0.000483	5e-05
102	Fzd1	chr5:4753838-4758216	OK	4.95	6.36	1.41	0.000483	5e-05
103	Irgm1	chr11:48865248-48871346	OK	2.31	3.71	1.39	0.000483	5e-05
104	Cpeb3	chr19:37021290-37207471	OK	0.37	1.74	1.37	0.000483	5e-05
105	Pam	chr1:97821093-98095632	OK	4.76	6.13	1.37	0.000483	5e-05
106	Pde8b	chr13:95024104-95250304	OK	1.26	2.62	1.36	0.000483	5e-05
107	Pld1	chr3:27938679-28133362	OK	-0.01	1.35	1.36	0.000483	5e-05
108	Gchfr	chr2:119167787-119172389	OK	3.85	5.2	1.35	0.000483	5e-05
109	Fam43a	chr16:30599722-30602797	OK	3.24	4.58	1.34	0.000483	5e-05
110	Nrgn	chr9:37544492-37552745	OK	-0.48	0.86	1.34	0.000483	5e-05
111	Agpat9	chr5:100846228-100899102	OK	-0.75	0.58	1.33	0.000483	5e-05
112	Il16	chr7:83643062-83735490	OK	-1.24	0.09	1.33	0.000483	5e-05
113	Dpysl3	chr18:43320978-43438286	OK	3.86	5.18	1.32	0.000483	5e-05
114	Fam107b	chr2:3713457-3782134	OK	4.03	5.35	1.32	0.000483	5e-05
115	Smoc2	chr17:14279505-14404790	OK	2.56	3.88	1.32	0.000483	5e-05
116	Zdhhc2	chr8:40423814-40484842	OK	1.97	3.29	1.32	0.000483	5e-05
117	Fam110c	chr12:31073967-31079940	OK	1.4	2.71	1.31	0.000483	5e-05
118	Sh3bp4	chr1:89070461-89153793	OK	2.61	3.92	1.31	0.000483	5e-05
119	Sdpr	chr1:51218385-51333779	OK	5.49	6.78	1.3	0.000483	5e-05
120	Ltbp2	chr12:84783211-84879755	OK	4.21	5.5	1.29	0.000483	5e-05
121	Rgs20	chr1:4909575-5070285	OK	2.63	3.91	1.29	0.000483	5e-05
122	Grk5	chr19:60889748-61140840	OK	1.48	2.76	1.28	0.000483	5e-05
123	Sema5a	chr15:32244812-32696341	OK	1.5	2.79	1.28	0.000483	5e-05
124	Fgd3	chr13:49263109-49309208	OK	0.4	1.67	1.27	0.000483	5e-05
125	Gpc1	chr1:92831685-92860196	OK	5.61	6.88	1.27	0.000483	5e-05
126	Cpe	chr8:64592550-64693040	OK	7.08	8.34	1.26	0.000483	5e-05
127	Cryab	chr9:50751071-50756635	OK	5.09	6.35	1.26	0.000483	5e-05
128	Pdlim2	chr14:70164217-70177672	OK	3.44	4.7	1.26	0.000483	5e-05
129	Dmxl2	chr9:54365157-54501626	OK	-0.42	0.82	1.25	0.000483	5e-05
130	Lrrc8d	chr5:105699968-105815215	OK	0.91	2.16	1.25	0.000483	5e-05
131	Phldb2	chr16:45746230-45844378	OK	4.08	5.32	1.24	0.000483	5e-05
132	Amigo2	chr15:97244073-97385691	OK	3.27	4.5	1.23	0.000483	5e-05
133	Arhgap31	chr16:38598342-38713035	OK	1.42	2.65	1.23	0.000483	5e-05
134	Gjb3	chr4:127325234-127330836	OK	3.73	4.96	1.23	0.000483	5e-05
135	Gli1	chr10:127321963-127341579	OK	-1.14	0.09	1.23	0.000483	5e-05
136	Tec	chr5:72755717-72868448	OK	-0.82	0.41	1.23	0.000483	5e-05
137	Eva1c	chr16:90830858-90904885	OK	0.75	1.97	1.22	0.000483	5e-05
138	Heg1	chr16:33684465-33768195	OK	3.21	4.43	1.22	0.000483	5e-05
139	Slc7a2	chr8:40862366-40922070	OK	0.59	1.81	1.22	0.000483	5e-05
140	Col12a1	chr9:79598986-79718722	OK	4.42	5.64	1.21	0.000483	5e-05
141	Tgm2	chr2:158116404-158146392	OK	1.6	2.82	1.21	0.000483	5e-05
142	Trim7	chr11:48826137-48850195	OK	-0.25	0.96	1.21	0.000483	5e-05
143	Capn5	chr7:98121558-98184799	OK	0.27	1.47	1.2	0.000483	5e-05
144	Chrd	chr16:20724453-20742384	OK	0.58	1.78	1.2	0.000483	5e-05
145	Lxn	chr3:67430114-67475068	OK	6.6	7.8	1.2	0.000483	5e-05
146	Ly6c1	chr15:75044017-75048837	OK	2.25	3.46	1.2	0.000483	5e-05
147	Rhou	chr8:123653928-123663880	OK	3.85	5.05	1.2	0.000483	5e-05
148	Slit2	chr5:47983154-48306282	OK	4.88	6.08	1.2	0.000483	5e-05
149	AI606473	chr3:154330820-154334687	OK	1.42	2.61	1.19	0.000483	5e-05
150	Bicc1	chr10:70925095-71159634	OK	4.85	6.03	1.18	0.000483	5e-05
151	Col5a3	chr9:20770049-20815034	OK	1	2.18	1.18	0.000483	5e-05
152	Rab27b	chr18:69979130-70141605	OK	0.74	1.91	1.17	0.000483	5e-05
153	Sepp1	chr15:3270766-3280508	OK	2.84	4.01	1.17	0.000483	5e-05
154	Adrb2	chr18:62177712-62179981	OK	-0.65	0.5	1.16	0.000483	5e-05
155	Irs1	chr1:82233104-82291439	OK	2.6	3.76	1.16	0.000483	5e-05
156	Tmem176a	chr6:48841482-48845364	OK	0.23	1.39	1.16	0.000483	5e-05
157	Asb4	chr6:5383385-5433021	OK	2.68	3.84	1.15	0.000483	5e-05
158	Gdpd5	chr7:99381548-99460984	OK	-0.65	0.5	1.15	0.000483	5e-05
159	Kif13b	chr14:64652530-64806296	OK	1.08	2.23	1.15	0.000483	5e-05
160	Ssfa2	chr2:79635424-79672964	OK	2.2	3.35	1.15	0.000483	5e-05
161	Arrb1	chr7:99535485-99606771	OK	0.29	1.43	1.14	0.000483	5e-05
162	Gstt1	chr10:75783812-75798584	OK	1.37	2.51	1.14	0.000483	5e-05
163	Kalrn	chr16:33969072-34514027	OK	1.11	2.25	1.14	0.000483	5e-05
164	Mmp28	chr11:83441875-83462961	OK	-0.24	0.89	1.14	0.000483	5e-05
165	Anpep	chr7:79821802-79842352	OK	0.49	1.62	1.13	0.000483	5e-05
166	Atp10d	chr5:72203328-72298771	OK	0.77	1.89	1.11	0.000483	5e-05
167	Phactr1	chr13:42680798-43138512	OK	2.18	3.29	1.11	0.000483	5e-05
168	Angpt1	chr15:42424666-42676977	OK	0.53	1.63	1.09	0.000483	5e-05
169	Col28a1	chr6:7997807-8192617	OK	0.35	1.43	1.09	0.000483	5e-05
170	Fgfbp3	chr19:36917549-36919599	OK	2.14	3.23	1.09	0.000483	5e-05
171	Pde3a	chr6:141249268-141499351	OK	0.73	1.82	1.09	0.000483	5e-05
172	Aox1	chr1:58029968-58106410	OK	0.48	1.57	1.08	0.000483	5e-05
173	Bpgm	chr6:34476355-34505610	OK	3.01	4.09	1.08	0.000483	5e-05
174	C1rl	chr6:124493112-124510643	OK	-0.22	0.85	1.07	0.000483	5e-05
175	Ddr1	chr17:35681566-35704139	OK	3.86	4.93	1.07	0.000483	5e-05
176	Far1	chr7:113513833-113570888	OK	5.51	6.58	1.07	0.000483	5e-05
177	Ppp1r3c	chr19:36731730-36736604	OK	0.72	1.79	1.07	0.000483	5e-05
178	Ptx3	chr3:66053557-66296837	OK	7.25	8.32	1.07	0.000483	5e-05
179	Dab2	chr15:6299788-6440709	OK	3.84	4.91	1.06	0.000483	5e-05
180	Paqr8	chr1:20890621-20938756	OK	-0.46	0.61	1.06	0.000483	5e-05
181	9930012K11Rik	chr14:70154404-70159502	OK	1.6	2.65	1.05	0.000483	5e-05
182	Thbs1	chr2:118111921-118127133	OK	6.48	7.53	1.05	0.000483	5e-05
183	Rapgef3	chr15:97744769-97767666	OK	1.05	2.09	1.04	0.000483	5e-05
184	Stx11	chr10:12939982-12964259	OK	1.56	2.6	1.04	0.000483	5e-05
185	Dhrs3	chr4:144892826-144927645	OK	-0.34	0.69	1.03	0.000483	5e-05
186	Dock4	chr12:40446052-40846488	OK	-0.48	0.54	1.03	0.000483	5e-05
187	Glcci1	chr6:8509599-8597549	OK	1.72	2.75	1.03	0.000483	5e-05
188	Nupr1	chr7:126623245-126625470	OK	4	5.02	1.02	0.000483	5e-05
189	Per2	chr1:91415981-91459328	OK	0.7	1.72	1.02	0.000483	5e-05
190	Cemip	chr7:83932856-84086505	OK	4.83	5.84	1.01	0.000483	5e-05
191	Mocos	chr18:24653690-24701556	OK	0.39	1.4	1.01	0.000483	5e-05
192	Ngf	chr3:102469918-102521013	OK	2.88	3.89	1.01	0.000483	5e-05
193	Cthrc1	chr15:39076931-39087119	OK	6.44	7.44	1	0.000483	5e-05
194	Ddhd1	chr14:45593170-45658143	OK	2.3	3.3	1	0.000483	5e-05
195	Gpr85	chr6:13835073-13839848	OK	2.55	3.55	1	0.000483	5e-05
196	Ugt1a7c	chr1:88055410-88220002	OK	3.32	2.31	-1	0.000483	5e-05
197	Unc13b	chr4:43058983-43264887	OK	0.04	-0.96	-1	0.000483	5e-05
198	Inpp4b	chr8:81342561-82127917	OK	0.13	-0.88	-1.01	0.000483	5e-05
199	Klk8	chr7:43797576-43803822	OK	0.56	-0.46	-1.02	0.000483	5e-05
200	Casp12	chr9:5345475-5373034	OK	3.96	2.93	-1.03	0.000483	5e-05
201	Slc27a6	chr18:58556239-58612869	OK	2.79	1.76	-1.03	0.000483	5e-05
202	Ablim1	chr19:57033263-57216032	OK	0.94	-0.1	-1.04	0.000483	5e-05
203	Slc16a9	chr10:70245275-70285951	OK	0.26	-0.78	-1.04	0.000483	5e-05
204	Car13	chr3:14641726-14663002	OK	4.42	3.37	-1.05	0.000483	5e-05
205	Cx3cl1	chr8:94772179-94782426	OK	4.7	3.65	-1.05	0.000483	5e-05
206	Mcam	chr9:44134657-44142726	OK	1.23	0.18	-1.05	0.000483	5e-05
207	Notch1	chr2:26457901-26503822	OK	1.35	0.3	-1.05	0.000483	5e-05
208	Casp4	chr9:5308848-5336791	OK	2.91	1.85	-1.06	0.000483	5e-05
209	Il1rl1	chr1:40429569-40465414	OK	9.88	8.82	-1.06	0.000483	5e-05
210	P2rx3	chr2:84996551-85035834	OK	2.18	1.13	-1.06	0.000483	5e-05
211	Foxs1	chr2:152931897-152933208	OK	1.62	0.55	-1.07	0.000483	5e-05
212	Myo1d	chr11:80482126-80780025	OK	4.76	3.69	-1.07	0.000483	5e-05
213	Il11	chr7:4772377-4782857	OK	3.58	2.5	-1.08	0.000483	5e-05
214	Cacna1i	chr15:80287237-80398292	OK	0.3	-0.8	-1.1	0.000483	5e-05
215	Ptn	chr6:36715662-36811361	OK	7.85	6.75	-1.1	0.000483	5e-05
216	Gm2115	chr7:84528953-84578339	OK	5.97	4.86	-1.11	0.000483	5e-05
217	Siglec15	chr18:78043613-78057268	OK	0.65	-0.47	-1.11	0.00463	0.0006
218	Cish	chr9:107296688-107301961	OK	3.61	2.49	-1.12	0.000483	5e-05
219	Dnmt3l	chr10:78030021-78063622	OK	2.1	0.98	-1.12	0.000483	5e-05
220	Sox5	chr6:143828424-144209568	OK	2.42	1.29	-1.13	0.000483	5e-05
221	Foxo6	chr4:120267077-120287261	OK	0.26	-0.9	-1.16	0.000483	5e-05
222	Abcg2	chr6:58596671-58692451	OK	4.1	2.92	-1.18	0.000483	5e-05
223	Foxl1	chr8:121127684-121130644	OK	1.04	-0.15	-1.19	0.000483	5e-05
224	Trem2	chr17:48346400-48352276	OK	2.47	1.28	-1.19	0.000483	5e-05
225	Mmp9	chr2:164948218-164955849	OK	1.14	-0.05	-1.2	0.000483	5e-05
226	Ank3	chr10:69533707-70027436	OK	4.46	3.25	-1.21	0.000483	5e-05
227	Rcan2	chr17:43801850-44039516	OK	3.92	2.69	-1.22	0.000483	5e-05
228	Hspb7	chr4:141420778-141425310	OK	0.19	-1.04	-1.23	0.000483	5e-05
229	Kcnab1	chr3:65109367-65378225	OK	1.94	0.7	-1.24	0.000483	5e-05
230	Diras2	chr13:52504374-52530836	OK	0.96	-0.29	-1.25	0.000483	5e-05
231	Txnip	chr3:96555767-96566801	OK	4.95	3.71	-1.25	0.000483	5e-05
232	Eva1a	chr6:82041627-82093099	OK	0.01	-1.26	-1.27	0.00134	0.00015
233	Mycn	chr12:12936092-12941836	OK	1.73	0.45	-1.28	0.000483	5e-05
234	Hivep3	chr4:119814677-120135411	OK	1.58	0.28	-1.31	0.000483	5e-05
235	Snap25	chr2:136713449-136782428	OK	1.93	0.63	-1.31	0.000483	5e-05
236	Acot11	chr4:106733914-106799831	OK	0.53	-0.79	-1.32	0.000483	5e-05
237	Cd24a	chr10:43579168-43584265	OK	6.68	5.36	-1.32	0.000483	5e-05
238	Fxyd1	chr7:31051677-31055656	OK	2.91	1.57	-1.34	0.000483	5e-05
239	Smarca1	chrX:47809369-47892552	OK	1.33	-0.01	-1.34	0.000483	5e-05
240	9130024F11Rik	chr1:56971468-56975196	OK	1.38	0.01	-1.38	0.000483	5e-05
241	Dact1	chr12:71309883-71320107	OK	2.71	1.32	-1.39	0.000483	5e-05
242	Sphk1	chr11:116531910-116536675	OK	2.05	0.65	-1.39	0.000483	5e-05
243	Lpl	chr8:68880554-68906932	OK	2.64	1.23	-1.41	0.000483	5e-05
244	Lvrn	chr18:46850038-46905446	OK	0.4	-1.01	-1.42	0.000483	5e-05
245	Cd34	chr1:194938820-194976959	OK	6.19	4.76	-1.43	0.000483	5e-05
246	Eya1	chr1:14168957-14310199	OK	1.37	-0.07	-1.44	0.000483	5e-05
247	Scg5	chr2:113776312-113829091	OK	1.55	0.11	-1.44	0.000483	5e-05
248	Fibin	chr2:110360924-110362993	OK	0.56	-0.93	-1.49	0.000483	5e-05
249	Grpr	chrX:163513903-163549736	OK	1.23	-0.28	-1.51	0.000483	5e-05
250	Spp1	chr5:104435110-104441053	OK	10.87	9.32	-1.54	0.000483	5e-05
251	Sytl2	chr7:90302354-90410719	OK	1.18	-0.37	-1.55	0.000483	5e-05
252	AW551984	chr9:39587395-39604124	OK	4.84	3.27	-1.57	0.000483	5e-05
253	Fam135b	chr15:71445677-71727838	OK	1.65	0.06	-1.59	0.000483	5e-05
254	Cytip	chr2:58129138-58160122	OK	0.41	-1.2	-1.61	0.000483	5e-05
255	Catip	chr1:74362107-74369321	OK	1.4	-0.25	-1.65	0.000483	5e-05
256	Dkk2	chr3:132085291-132180304	OK	2.06	0.4	-1.65	0.000483	5e-05
257	Sulf2	chr2:166073898-166155683	OK	2.17	0.53	-1.65	0.000483	5e-05
258	St3gal1	chr15:67102874-67176882	OK	4.79	3.12	-1.67	0.000483	5e-05
259	Kcnk10	chr12:98433993-98577940	OK	2.94	1.25	-1.68	0.000483	5e-05
260	Cxcl1	chr5:90891244-90893115	OK	1.29	-0.43	-1.71	0.000483	5e-05
261	Tusc1	chr4:93334147-93335511	OK	1.82	0.11	-1.72	0.000483	5e-05
262	H19	chr7:142575529-142578146	OK	4.1	2.36	-1.74	0.000483	5e-05
263	Rgcc	chr14:79288749-79301635	OK	2.89	1.15	-1.74	0.000483	5e-05
264	Tnc	chr4:63959784-64047015	OK	7.55	5.79	-1.76	0.000483	5e-05
265	Mapkapk3	chr9:107254926-107289877	OK	4.23	2.45	-1.77	0.000483	5e-05
266	Ptgfr	chr3:151798609-151837528	OK	5.42	3.64	-1.78	0.000483	5e-05
267	Il18rap	chr1:40515361-40551705	OK	1.18	-0.61	-1.79	0.000483	5e-05
268	Has2	chr15:56665626-56694546	OK	4.49	2.69	-1.8	0.000483	5e-05
269	4833427G06Rik	chr9:51081312-51102078	OK	1.46	-0.36	-1.82	0.000483	5e-05
270	Slc17a7	chr7:45163920-45176139	OK	0.06	-1.8	-1.85	0.000483	5e-05
271	Dcn	chr10:97479499-97518162	OK	6.89	5.02	-1.87	0.000483	5e-05
272	Ramp3	chr11:6650147-6677475	OK	5.93	4.04	-1.89	0.000483	5e-05
273	Crabp1	chr9:54764747-54773110	OK	7.83	5.91	-1.92	0.000483	5e-05
274	Serpine2	chr1:79794320-79858665	OK	5.22	3.25	-1.97	0.000483	5e-05
275	Ptgir	chr7:16906489-16910905	OK	0.12	-1.92	-2.05	0.000483	5e-05
276	Lum	chr10:97565500-97572703	OK	5.12	3.07	-2.06	0.000483	5e-05
277	Pkp2	chr16:16213344-16272712	OK	0.15	-1.93	-2.07	0.000483	5e-05
278	Tnn	chr1:160085031-160153575	OK	1.33	-0.83	-2.16	0.000483	5e-05
279	Cxcl5	chr5:90759297-90761625	OK	3.31	1.06	-2.25	0.000483	5e-05
280	Sfrp2	chr3:83766320-83774314	OK	5.11	2.83	-2.27	0.000483	5e-05
281	Fcrlb	chr1:170907272-170912941	OK	0.25	-2.05	-2.3	0.00212	0.00025
282	Osbp2	chr11:3703730-3863903	OK	3.5	1.12	-2.38	0.000483	5e-05
283	Rgag4	chrX:101849384-102092055	OK	0.14	-2.28	-2.42	0.000483	5e-05
284	4930550L24Rik	chrX:58911460-58920304	OK	2.46	0	-2.46	0.000483	5e-05
285	Gpr149	chr3:62529962-62605140	OK	1.65	-0.82	-2.47	0.000483	5e-05
286	Rtl1	chr12:109590168-109595403	OK	0.46	-2.08	-2.53	0.000483	5e-05
287	Igf1	chr10:87859055-87937047	OK	1.62	-1.18	-2.8	0.000483	5e-05
288	Agtr2	chrX:21484623-21488833	OK	0.02	-2.96	-2.98	0.000483	5e-05
289	Lmcd1	chr6:112273757-112330423	OK	0.63	-2.46	-3.09	0.000483	5e-05
290	Sparcl1	chr5:104079108-104114088	OK	3.86	0.45	-3.4	0.000483	5e-05
291	Cck	chr9:121489823-121495694	OK	2.81	-0.95	-3.76	0.000483	5e-05
292	Vip	chr10:5639217-5647614	OK	3.95	-0.26	-4.22	0.000483	5e-05

## Sheet: Table A. DESeq2
Table A. List of differentially expressed genes in NIH3T3 cells expressing Foxc1 or pLXSH empty vector control.
DESeq2 results:
Selection criteria: q-value (FDR-adjusted p-value) ≤ 0.01, absolute log2 ratio ≥ 1, CuffLinks signal cut-off ≥ 1 FPKM in either condition.
#	Gene	Locus	baseMean	log2 ratio	log2 ratio s.e.	q value	p value
1	Il1rn	chr2:24336859-24351491	1660.92	12.3354	1.02255	1.43231e-31	1.64847e-33
2	Arhgap36	chrX:49470449-49500250	211.184	11.2152	1.18388	1.31341e-19	2.71291e-21
3	Anxa10	chr8:62057041-62123193	124.687	10.4549	1.18689	5.34603e-17	1.26724e-18
4	Kng1	chr16:23058299-23082078	55.6041	9.29096	1.19767	2.80526e-13	8.65952e-15
5	F5	chr1:164115263-164220277	580.177	9.00849	0.551194	8.92735e-58	4.83111e-60
6	Glra3	chr8:55940824-56125352	17.1659	7.59648	1.23321	1.46921e-08	7.27886e-10
7	E330011O21Rik	chr16:78250862-78255454	16.415	7.52932	1.23547	2.16549e-08	1.09925e-09
8	Serpina3h	chr12:104247895-104254405	58.6347	6.4951	0.748316	1.63321e-16	3.97099e-18
9	Vnn1	chr10:23894687-23905343	436.13	6.38911	0.269637	2.5236e-121	4.0393e-124
10	Fgf23	chr6:127072901-127082296	92.4665	6.34376	0.568905	4.77291e-27	7.09389e-29
11	Akr1c18	chr13:4132626-4150631	277.004	5.91898	0.292906	2.33248e-88	8.35568e-91
12	Wnt2	chr6:17988939-18030445	123.948	5.86434	0.426693	6.45096e-41	5.55608e-43
13	Mc5r	chr18:68337602-68339711	14.3372	5.44707	1.10311	1.05808e-05	7.8953e-07
14	Il33	chr19:29925113-29960715	52.8831	5.15102	0.524999	5.14987e-21	1.00485e-22
15	Agt	chr8:124556586-124569707	130.234	4.91287	0.314841	1.10279e-52	6.80836e-55
16	Prss35	chr9:86743632-86757506	49.8546	4.90683	0.507037	1.85436e-20	3.7596e-22
17	Itih2	chr2:10094590-10130683	207.878	4.89499	0.250532	1.33338e-82	5.18311e-85
18	Foxc1	chr13:31806645-31810635	5178.65	4.86276	0.0788125	0	0
19	Otor	chr2:143078491-143081699	14.2809	4.84094	0.92259	2.28005e-06	1.54494e-07
20	Col10a1	chr10:34303611-34418528	990.484	4.56489	0.114064	0	1e-200
21	Il20ra	chr10:19712586-19760053	126.462	4.11552	0.261871	1.98238e-53	1.17855e-55
22	Ogn	chr13:49464058-49652731	2051.72	3.71502	0.0893979	0	0
23	Apba1	chr19:23758875-23949597	983.897	3.60034	0.0952259	0	0
24	Slc4a4	chr5:88887259-89239656	98.0067	3.58453	0.262415	2.01411e-40	1.76542e-42
25	Itgbl1	chr14:123660139-123974079	397.209	3.49936	0.140293	2.3679e-134	2.52672e-137
26	Ifit3b	chr19:34607956-34613401	22.6531	3.42446	0.530022	2.2862e-09	1.04029e-10
27	Itga1	chr13:114958080-115101964	305.626	3.37555	0.150315	5.18178e-109	1.10587e-111
28	Camk1g	chr1:193346345-193370282	58.6567	3.32812	0.325633	9.11943e-23	1.60563e-24
29	Ifi47	chr11:49037659-49135387	26.4249	3.31237	0.474707	7.74399e-11	2.99995e-12
30	Hid1	chr11:115347708-115367719	294.655	3.25944	0.155078	1.39892e-95	4.47824e-98
31	Krt15	chr11:100131758-100135949	62.0077	3.20138	0.304824	5.06841e-24	8.42159e-26
32	Pdk4	chr6:5483350-5496278	2228.92	3.16655	0.0815919	0	1e-200
33	Rspo2	chr15:43020794-43170818	124.156	3.15321	0.216095	4.42533e-46	3.17059e-48
34	Fam20a	chr11:109672925-109722256	266.016	3.07881	0.151722	4.27492e-89	1.49883e-91
35	Nlrp2	chr7:5298546-5360682	55.1066	3.0111	0.314302	4.73791e-20	9.67805e-22
36	C430002N11Rik	chr9:96765561-96774397	21.6127	2.88645	0.498868	1.30262e-07	7.20809e-09
37	Myh14	chr7:44605802-44670843	98.9973	2.87147	0.228171	2.36759e-34	2.56249e-36
38	Omd	chr13:49464058-49652731	147.351	2.86399	0.192229	4.88874e-48	3.35356e-50
39	Sulf1	chr1:12692429-12860372	525.067	2.84512	0.113069	1.03621e-136	1.02674e-139
40	Rasgef1b	chr5:99217419-99252927	72.4319	2.82283	0.265335	1.20649e-24	1.96791e-26
41	Pgbd5	chr8:124369048-124433936	209.312	2.7837	0.160087	2.16221e-65	1.0053e-67
42	Scara5	chr14:65666402-65764826	85.309	2.75914	0.248864	9.57219e-27	1.45188e-28
43	Dio2	chr12:90724551-90738438	1017.36	2.72267	0.0920914	9.25019e-189	4.23027e-192
44	Ifit3	chr19:34583528-34588982	35.4326	2.72035	0.371985	7.3991e-12	2.61112e-13
45	Wfdc12	chr2:164189230-164190558	11.0291	2.56963	0.642534	0.000591361	6.35533e-05
46	Srpx2	chrX:133908424-133932446	149.812	2.50074	0.178171	1.15697e-42	9.43565e-45
47	Pkia	chr3:7366603-7445365	434.285	2.49534	0.129985	9.68959e-80	3.91424e-82
48	Plscr2	chr9:92275601-92297752	71.9495	2.4589	0.251977	8.59972e-21	1.69766e-22
49	Adra1b	chr11:43774604-43901237	81.6749	2.37717	0.237055	6.12954e-22	1.14929e-23
50	Napsa	chr7:44572444-44586846	23.6318	2.36017	0.425162	4.65836e-07	2.83692e-08
51	Aldh3a1	chr11:61208741-61218416	227.176	2.27878	0.151218	3.83004e-49	2.56893e-51
52	Gdf5	chr2:155941024-155945364	161.73	2.2693	0.166617	3.45189e-40	3.05197e-42
53	Col11a1	chr3:114030539-114220326	879.791	2.23582	0.090175	9.04401e-133	1.034e-135
54	8430408G22Rik	chr6:116633007-116673836	19.1089	2.1433	0.467428	5.32495e-05	4.53351e-06
55	C1qtnf1	chr11:118428456-118454995	223.486	2.11041	0.149601	4.33928e-43	3.43967e-45
56	Ror1	chr4:100095790-100442545	291.428	2.10513	0.131142	9.8988e-56	5.50772e-58
57	Postn	chr3:54361106-54391041	4981.18	2.08208	0.150811	2.77676e-41	2.34924e-43
58	Nr3c2	chr8:76902507-77243639	54.5516	2.07928	0.289092	1.74319e-11	6.36422e-13
59	Enpp2	chr15:54838678-54920146	87.2123	2.0559	0.229542	1.44596e-17	3.35039e-19
60	Sorcs2	chr5:36017180-36398139	250.324	2.02595	0.134083	2.13344e-49	1.39844e-51
61	Tpd52l1	chr10:31332379-31445921	21.8302	1.95213	0.420797	4.2309e-05	3.49888e-06
62	Adamts6	chr13:104287872-104494763	123.014	1.93985	0.186227	1.21433e-23	2.0825e-25
63	Maf	chr8:115703252-115706894	154.481	1.87884	0.168734	5.6787e-27	8.48342e-29
64	Fhl1	chrX:56731760-56793346	31.5762	1.87865	0.345503	8.50337e-07	5.40534e-08
65	Aspg	chr12:112106682-112127573	140.157	1.84457	0.17118	2.83033e-25	4.48711e-27
66	Mtss1	chr15:58941233-59082026	63.3978	1.83015	0.254392	1.72403e-11	6.28114e-13
67	Wisp2	chr2:163820833-163833147	2112.67	1.80473	0.0638684	2.19182e-172	1.16942e-175
68	Kcnh5	chr12:74897216-75177332	73.7603	1.7681	0.229373	4.03855e-13	1.27429e-14
69	Fam213a	chr14:40993739-41013775	414.314	1.75031	0.104623	1.55706e-60	7.95144e-63
70	Msln	chr17:25748612-25754327	475.549	1.73752	0.101416	1.76637e-63	8.4818e-66
71	Vamp5	chr6:72368048-72380468	171.909	1.73097	0.155072	4.21535e-27	6.23306e-29
72	Tgfb2	chr1:186623185-186705992	353.654	1.70849	0.112115	3.12744e-50	1.95465e-52
73	Fjx1	chr2:102449365-102451792	65.1906	1.7042	0.251954	3.257e-10	1.34302e-11
74	Aspn	chr13:49464058-49652731	1437.46	1.69527	0.171193	2.12658e-21	4.05218e-23
75	Sfrp1	chr8:23411501-23449632	1042.09	1.68962	0.086512	1.52634e-82	6.04953e-85
76	Ahr	chr12:35497978-35534989	1606.88	1.68187	0.0732718	6.54295e-114	1.34649e-116
77	Rnf43	chr11:87663086-87735539	209.146	1.67977	0.144417	2.2291e-29	2.85434e-31
78	Lhx8	chr3:154306293-154330560	105.255	1.64966	0.192699	4.48182e-16	1.12045e-17
79	Loxl4	chr19:42592278-42612806	1028.28	1.63379	0.0752396	5.94422e-102	1.49512e-104
80	Mest	chr6:30733505-30896794	93.0789	1.6002	0.213517	1.97584e-12	6.65642e-14
81	Fst	chr13:114452261-114458951	108.243	1.5916	0.186291	5.15569e-16	1.30071e-17
82	Brinp3	chr1:146495665-146902472	180.967	1.58529	0.156824	2.76448e-22	5.05697e-24
83	S100a16	chr3:90541222-90543151	21.9914	1.58388	0.419038	0.00133371	0.000156955
84	Adgrg6	chr10:14402584-14545036	151.406	1.58208	0.163181	1.58763e-20	3.15831e-22
85	2010111I01Rik	chr13:62964892-63431745	588.561	1.57983	0.0945719	2.32448e-60	1.20476e-62
86	Actr3b	chr5:25760025-25850341	107.648	1.57809	0.19137	6.00431e-15	1.63379e-16
87	Gadd45a	chr6:67035095-67080652	363.227	1.57628	0.110771	7.67087e-44	5.96363e-46
88	Alcam	chr16:52248995-52452997	1623.55	1.57612	0.0675243	9.17008e-118	1.67745e-120
89	Klf4	chr4:55527136-55532475	1263.39	1.56872	0.0713707	1.96431e-104	4.49157e-107
90	Ly6a	chr15:74994876-74998031	344.823	1.56815	0.117948	2.5672e-38	2.46545e-40
91	Cped1	chr6:21985909-22255606	1299.61	1.56591	0.0908677	3.18783e-64	1.50644e-66
92	Mfap3l	chr8:60632824-60676731	363.27	1.55389	0.112961	5.49611e-41	4.6918e-43
93	Etl4	chr2:20289912-20810535	310.728	1.54931	0.118051	2.39856e-37	2.39491e-39
94	Rerg	chr6:137054824-137170496	90.6333	1.54552	0.201661	5.63075e-13	1.80253e-14
95	Ctgf	chr10:24595441-24598682	8793.21	1.53182	0.0562831	5.46905e-160	4.16848e-163
96	Cyp1b1	chr17:79706952-79715041	1089.53	1.53165	0.0836243	1.4489e-72	6.18432e-75
97	Gjb4	chr4:127351085-127354081	90.8225	1.53046	0.203418	1.60534e-12	5.32258e-14
98	Rbp1	chr9:98422960-98446550	2776.66	1.5246	0.0695482	6.85207e-104	1.61901e-106
99	Efnb2	chr8:8617438-8660773	2090.5	1.52155	0.068715	5.52435e-106	1.22108e-108
100	Rbp2	chr9:98490536-98509771	17.9132	1.50587	0.443728	0.00496832	0.000689581
101	Nrep	chr18:33437018-33464029	432.057	1.50167	0.11235	1.01e-38	9.5457e-41
102	2610035D17Rik	chr11:113043905-113201838	56.7932	1.50111	0.256441	8.87461e-08	4.80933e-09
103	Thrb	chr14:17660959-18038088	301.358	1.48945	0.129285	7.78201e-29	1.038e-30
104	Tmem176b	chr6:48833810-48841374	66.1853	1.48886	0.233791	4.06971e-09	1.91078e-10
105	Gm14005	chr2:128298662-128429351	69.8466	1.48677	0.237591	8.07326e-09	3.90741e-10
106	Megf6	chr4:154170712-154275721	203.199	1.48655	0.146118	1.45757e-22	2.59963e-24
107	Dusp4	chr8:34807609-34819894	212.103	1.4608	0.140517	1.50333e-23	2.58958e-25
108	Cdsn	chr17:35552127-35557180	923.832	1.43471	0.0777643	1.2571e-73	5.26987e-76
109	Tle4	chr19:14448071-14598183	482.938	1.41792	0.0960945	4.09076e-47	2.83734e-49
110	Fzd1	chr5:4753838-4758216	4950.7	1.4137	0.0579947	2.21567e-128	3.03978e-131
111	Dusp1	chr17:26505590-26508472	534.379	1.40467	0.096831	1.49286e-45	1.10372e-47
112	Irgm1	chr11:48865248-48871346	416.184	1.39996	0.10308	5.7499e-40	5.1714e-42
113	Pam	chr1:97821093-98095632	4112.66	1.38699	0.056654	1.78344e-129	2.31087e-132
114	Cpeb3	chr19:37021290-37207471	271.265	1.38137	0.135479	1.16672e-22	2.0631e-24
115	Agpat9	chr5:100846228-100899102	59.4602	1.35752	0.247356	6.53157e-07	4.06232e-08
116	Pde8b	chr13:95024104-95250304	395.881	1.34983	0.1143	2.87565e-30	3.48497e-32
117	Pld1	chr3:27938679-28133362	174.977	1.34724	0.163783	7.08788e-15	1.93944e-16
118	Gchfr	chr2:119167787-119172389	248.267	1.34269	0.128002	5.77327e-24	9.63678e-26
119	Fam43a	chr16:30599722-30602797	1006.43	1.34218	0.0759842	1.73649e-67	7.94124e-70
120	Il16	chr7:83643062-83735490	75.9788	1.3383	0.214837	9.64438e-09	4.68252e-10
121	Nrgn	chr9:37544492-37552745	29.8004	1.32732	0.345525	0.00107622	0.000122305
122	D030025P21Rik	chr12:84783211-84879755	116.605	1.32603	0.18536	2.28804e-11	8.44063e-13
123	Zdhhc2	chr8:40423814-40484842	339.024	1.32587	0.112925	6.35292e-30	7.8443e-32
124	Fam107b	chr2:3713457-3782134	1728.84	1.32357	0.07111	6.1269e-75	2.52174e-77
125	Smoc2	chr17:14279505-14404790	575.823	1.31946	0.0907957	1.03504e-45	7.57344e-48
126	Dpysl3	chr18:43320978-43438286	2769.92	1.31839	0.0632476	5.05539e-94	1.6954e-96
127	Fam110c	chr12:31073967-31079940	240.774	1.31216	0.141357	7.69435e-19	1.65382e-20
128	Sh3bp4	chr1:89070461-89153793	776.615	1.30637	0.0928801	7.76979e-43	6.2182e-45
129	Pdlim2	chr14:70164217-70177672	543.434	1.30531	0.0952628	1.13277e-40	9.84266e-43
130	Sdpr	chr1:51218385-51333779	4665.96	1.29595	0.0613658	1.72413e-96	5.3879e-99
131	Tec	chr5:72755717-72868448	49.5546	1.2922	0.271493	2.45288e-05	1.93968e-06
132	Sema5a	chr15:32244812-32696341	1039.86	1.28828	0.0890308	2.48119e-45	1.87224e-47
133	Ltbp2	chr12:84783211-84879755	4423.59	1.28828	0.0848034	6.38249e-50	4.0377e-52
134	Fgd3	chr13:49263109-49309208	143.883	1.27786	0.163557	1.82787e-13	5.58672e-15
135	Lrrc8d	chr5:105699968-105815215	237.32	1.27324	0.129415	3.97218e-21	7.69005e-23
136	Rgs20	chr1:4909575-5070285	346.2	1.27231	0.110982	1.47232e-28	1.99751e-30
137	Gpc1	chr1:92831685-92860196	5975.98	1.27074	0.0588927	0	2.9428e-103
138	Grk5	chr19:60889748-61140840	283.41	1.26571	0.122054	1.94341e-23	3.39209e-25
139	Cpe	chr8:64592550-64693040	8929.5	1.25317	0.0529913	7.26977e-121	1.21902e-123
140	Phldb2	chr16:45746230-45844378	3220.34	1.24483	0.0592312	1.41494e-95	4.63739e-98
141	Arhgap31	chr16:38598342-38713035	695.307	1.23942	0.0867715	3.59362e-44	2.76643e-46
142	Gjb3	chr4:127325234-127330836	722.765	1.23919	0.0990105	5.61855e-34	6.12388e-36
143	Amigo2	chr15:97244073-97385691	931.595	1.23843	0.0854234	1.67945e-45	1.25447e-47
144	Dmxl2	chr9:54365157-54501626	277.434	1.23828	0.126591	6.88637e-21	1.34893e-22
145	Tmem176a	chr6:48841482-48845364	35.3835	1.22728	0.308913	0.000653279	7.10042e-05
146	Slc7a2	chr8:40862366-40922070	397.848	1.22299	0.110386	1.03806e-26	1.5824e-28
147	Heg1	chr16:33684465-33768195	1515.09	1.22028	0.0904946	2.091e-39	1.92844e-41
148	Capn5	chr7:98121558-98184799	179.813	1.21664	0.151699	3.58293e-14	1.05686e-15
149	Tgm2	chr2:158116404-158146392	362.26	1.21589	0.117171	1.81475e-23	3.15368e-25
150	Col12a1	chr9:79598986-79718722	8819.25	1.2096	0.216178	3.68805e-07	2.20102e-08
151	Chrd	chr16:20724453-20742384	165.183	1.20563	0.154201	1.75684e-13	5.34282e-15
152	Slit2	chr5:47983154-48306282	8327.68	1.20392	0.0764058	1.04867e-53	6.15452e-56
153	AI606473	chr3:154330820-154334687	186.222	1.20359	0.146294	7.02159e-15	1.91595e-16
154	Gli1	chr10:127321963-127341579	55.5028	1.20339	0.2511	2.11484e-05	1.64738e-06
155	Lxn	chr3:67430114-67475068	3111.75	1.20059	0.0608693	3.51977e-84	1.34137e-86
156	Rhou	chr8:123653928-123663880	1590.14	1.1989	0.0665011	2.60137e-70	1.16982e-72
157	Col5a3	chr9:20770049-20815034	426.087	1.19794	0.101254	2.24135e-30	2.69918e-32
158	Rab27b	chr18:69979130-70141605	379.097	1.19627	0.114442	8.34903e-24	1.41908e-25
159	Cryab	chr9:50751071-50756635	900.172	1.19589	0.0830115	6.19384e-45	4.72091e-47
160	Eva1c	chr16:90830858-90904885	115.621	1.19078	0.17883	6.4945e-10	2.76214e-11
161	Ly6c1	chr15:75044017-75048837	111.861	1.1871	0.185832	3.60235e-09	1.68036e-10
162	Adrb2	chr18:62177712-62179981	44.8238	1.18564	0.284871	0.000317111	3.15419e-05
163	Bicc1	chr10:70925095-71159634	2805.54	1.17717	0.0651848	1.51834e-70	6.71218e-73
164	Gstt1	chr10:75783812-75798584	76.3648	1.17604	0.225873	2.78472e-06	1.92298e-07
165	Mmp28	chr11:83441875-83462961	64.3755	1.16358	0.23508	9.98061e-06	7.43221e-07
166	Sepp1	chr15:3270766-3280508	452.612	1.16303	0.110902	5.91441e-24	9.91745e-26
167	Irs1	chr1:82233104-82291439	1841.92	1.16026	0.0768253	2.34828e-49	1.55717e-51
168	Gdpd5	chr7:99381548-99460984	74.7519	1.1576	0.217845	1.62387e-06	1.07309e-07
169	Asb4	chr6:5383385-5433021	678.383	1.15308	0.0853749	1.58769e-39	1.44006e-41
170	Ssfa2	chr2:79635424-79672964	766.394	1.13902	0.0884002	5.2495e-36	5.48157e-38
171	Kalrn	chr16:33969072-34514027	694.147	1.13879	0.108704	6.60486e-24	1.11256e-25
172	Kif13b	chr14:64652530-64806296	397.107	1.13658	0.109496	1.76567e-23	3.05494e-25
173	Anpep	chr7:79821802-79842352	156.158	1.1316	0.171769	1.01756e-09	4.45959e-11
174	Phactr1	chr13:42680798-43138512	728.448	1.13137	0.0895594	1.30828e-34	1.39603e-36
175	Arrb1	chr7:99535485-99606771	281.135	1.12646	0.123325	2.94299e-18	6.59482e-20
176	Atp10d	chr5:72203328-72298771	332.872	1.12025	0.112441	1.1651e-21	2.21119e-23
177	Fgfbp3	chr19:36917549-36919599	237.353	1.12009	0.126939	4.69861e-17	1.10661e-18
178	Trim7	chr11:48826137-48850195	41.346	1.09556	0.292483	0.00151513	0.000179881
179	Angpt1	chr15:42424666-42676977	192.933	1.08623	0.1393	2.05594e-13	6.29946e-15
180	Col28a1	chr6:7997807-8192617	172.832	1.08346	0.149499	1.18965e-11	4.25262e-13
181	Pde3a	chr6:141249268-141499351	210.824	1.08049	0.133176	1.73284e-14	4.92643e-16
182	Aox1	chr1:58029968-58106410	194.647	1.07703	0.145555	3.95174e-12	1.36745e-13
183	Gfra1	chr19:58235580-58455398	125.731	1.07541	0.176167	2.03748e-08	1.03117e-09
184	C1rl	chr6:124493112-124510643	78.8421	1.0748	0.221344	1.56555e-05	1.19922e-06
185	Far1	chr7:113513833-113570888	6182.92	1.07392	0.068685	6.84838e-53	4.17584e-55
186	Ptx3	chr3:66053557-66296837	8650.91	1.07176	0.0517053	5.62009e-93	1.92762e-95
187	Ddr1	chr17:35681566-35704139	1698.82	1.0638	0.0761144	2.618e-42	2.17501e-44
188	Dab2	chr15:6299788-6440709	2027.57	1.06254	0.0629402	1.23616e-61	6.12424e-64
189	Paqr8	chr1:20890621-20938756	102.12	1.06073	0.187408	2.60258e-07	1.51354e-08
190	Ppp1r3c	chr19:36731730-36736604	135.687	1.06055	0.16767	5.3259e-09	2.52899e-10
191	Rapgef3	chr15:97744769-97767666	252.496	1.05545	0.136826	3.88823e-13	1.221e-14
192	Stx11	chr10:12939982-12964259	198.466	1.05114	0.145015	1.18155e-11	4.21468e-13
193	Bpgm	chr6:34476355-34505610	517.337	1.04965	0.0935373	2.21472e-27	3.19041e-29
194	Thbs1	chr2:118111921-118127133	16400.8	1.04618	0.0656645	6.62391e-55	3.78654e-57
195	Gdpd1	chr11:86583864-87555823	122.246	1.04576	0.181876	1.5817e-07	8.93321e-09
196	9930012K11Rik	chr14:70154404-70159502	179.205	1.04565	0.144605	1.33195e-11	4.79178e-13
197	Ngf	chr3:102469918-102521013	203.308	1.02818	0.139567	5.01278e-12	1.74607e-13
198	Glcci1	chr6:8509599-8597549	587.025	1.02676	0.0887092	4.20856e-29	5.5494e-31
199	Dock4	chr12:40446052-40846488	179.225	1.01757	0.146101	8.45819e-11	3.28786e-12
200	Gpr85	chr6:13835073-13839848	517.802	1.01457	0.093258	9.3126e-26	1.448e-27
201	Mocos	chr18:24653690-24701556	112.934	1.01012	0.181666	4.43848e-07	2.69286e-08
202	Cemip	chr7:83932856-84086505	6219.68	1.00579	0.0770404	5.79521e-37	5.91889e-39
203	Cthrc1	chr15:39076931-39087119	2779.31	1.00236	0.0660279	7.40044e-50	4.73808e-52
204	Per2	chr1:91415981-91459328	293.789	1.00035	0.119326	1.9445e-15	5.14286e-17
205	Ugt1a7c	chr1:88055410-88220002	182.139	-1.00808	0.144141	6.93992e-11	2.67652e-12
206	Unc13b	chr4:43058983-43264887	100.463	-1.00887	0.193409	2.66495e-06	1.82606e-07
207	Ablim1	chr19:57033263-57216032	175.091	-1.01575	0.146552	1.05853e-10	4.17924e-12
208	Olfm1	chr2:28193092-28230736	291.564	-1.01869	0.121872	2.39091e-15	6.34175e-17
209	Slc27a6	chr18:58556239-58612869	267.279	-1.02526	0.120487	6.79443e-16	1.75039e-17
210	Slc16a9	chr10:70245275-70285951	64.552	-1.03081	0.230338	8.65965e-05	7.63407e-06
211	P2rx3	chr2:84996551-85035834	290.836	-1.031	0.118198	1.12164e-16	2.7186e-18
212	Casp12	chr9:5345475-5373034	599.404	-1.03409	0.0920593	1.96136e-27	2.81048e-29
213	Car13	chr3:14641726-14663002	709.283	-1.04315	0.0871131	4.16567e-31	4.82608e-33
214	Mcam	chr9:44134657-44142726	100.252	-1.04457	0.19268	9.27636e-07	5.91792e-08
215	Il1rl1	chr1:40429569-40465414	45249.8	-1.04484	0.0492798	3.07039e-97	9.12692e-100
216	Cx3cl1	chr8:94772179-94782426	1202.51	-1.04703	0.0791553	6.28649e-38	6.08525e-40
217	Notch1	chr2:26457901-26503822	370.77	-1.05879	0.117081	6.67046e-18	1.52017e-19
218	Dnmt3l	chr10:78030021-78063622	72.8179	-1.0604	0.222506	2.38798e-05	1.88199e-06
219	Myo1d	chr11:80482126-80780025	2077.25	-1.06224	0.0780298	3.7488e-40	3.34306e-42
220	Gm16062	chr11:59810079-59839767	81.4737	-1.06878	0.229879	4.04162e-05	3.33002e-06
221	Foxs1	chr2:152931897-152933208	53.9484	-1.07568	0.255923	0.000269378	2.63218e-05
222	Casp4	chr9:5308848-5336791	150.649	-1.08333	0.159478	2.67833e-10	1.09828e-11
223	Il11	chr7:4772377-4782857	329.991	-1.08805	0.115592	2.30331e-19	4.82783e-21
224	Sox5	chr6:143828424-144209568	522.315	-1.10819	0.109557	2.5967e-22	4.73027e-24
225	Gm2115	chr7:84528953-84578339	1624.45	-1.10866	0.0756654	1.84194e-46	1.30564e-48
226	Cacna1i	chr15:80287237-80398292	182.554	-1.11164	0.154997	2.01154e-11	7.38994e-13
227	Ptn	chr6:36715662-36811361	5861.3	-1.11594	0.0613571	1.48851e-71	6.46683e-74
228	Cish	chr9:107296688-107301961	375.522	-1.12134	0.10643	3.58478e-24	5.90178e-26
229	Abcg2	chr6:58596671-58692451	597.701	-1.16411	0.0945165	6.59115e-33	7.3849e-35
230	Trem2	chr17:48346400-48352276	76.9451	-1.17538	0.218419	1.14949e-06	7.39462e-08
231	Foxo6	chr4:120267077-120287261	43.6553	-1.1837	0.295658	0.000582099	6.23804e-05
232	Mmp9	chr2:164948218-164955849	100.275	-1.18742	0.198371	4.11101e-08	2.15264e-09
233	Foxl1	chr8:121127684-121130644	88.9695	-1.20955	0.208443	1.18351e-07	6.52194e-09
234	Hspb7	chr4:141420778-141425310	44.0873	-1.21379	0.281063	0.000167378	1.57045e-05
235	Rcan2	chr17:43801850-44039516	633.146	-1.21384	0.102412	1.75654e-30	2.08857e-32
236	Ank3	chr10:69533707-70027436	3106.32	-1.22013	0.0806555	1.64095e-49	1.06311e-51
237	Txnip	chr3:96555767-96566801	1216.77	-1.24686	0.0734777	2.84428e-62	1.38746e-64
238	Diras2	chr13:52504374-52530836	120.046	-1.24782	0.176544	4.15691e-11	1.57151e-12
239	Kcnab1	chr3:65109367-65378225	162.304	-1.24791	0.159633	1.76884e-13	5.3928e-15
240	Glipr1	chr10:111972694-111997264	24.2787	-1.27755	0.381341	0.00570931	0.000807658
241	Mycn	chr12:12936092-12941836	119.459	-1.2863	0.183864	6.8475e-11	2.63566e-12
242	Hivep3	chr4:119814677-120135411	388.631	-1.29638	0.130029	1.09248e-21	2.06506e-23
243	Smarca1	chrX:47809369-47892552	146.286	-1.30941	0.173755	1.46924e-12	4.84895e-14
244	Acot11	chr4:106733914-106799831	117.14	-1.312	0.18548	4.00234e-11	1.51003e-12
245	Fxyd1	chr7:31051677-31055656	45.8058	-1.31329	0.285582	5.02607e-05	4.25224e-06
246	Cd24a	chr10:43579168-43584265	2456.65	-1.31767	0.0620218	1.26035e-97	3.65039e-100
247	Snap25	chr2:136713449-136782428	111.583	-1.33343	0.193006	1.22881e-10	4.88902e-12
248	Dact1	chr12:71309883-71320107	332.605	-1.38745	0.11954	2.94402e-29	3.81466e-31
249	Sphk1	chr11:116531910-116536675	101.329	-1.40999	0.191935	5.84072e-12	2.03891e-13
250	Lpl	chr8:68880554-68906932	348.319	-1.41185	0.115278	1.52932e-32	1.7368e-34
251	Cd34	chr1:194938820-194976959	2459.85	-1.43266	0.0612726	3.73969e-118	6.55585e-121
252	Eya1	chr1:14168957-14310199	154.613	-1.4424	0.176475	1.07474e-14	2.99813e-16
253	Lvrn	chr18:46850038-46905446	63.9274	-1.45832	0.253258	1.51945e-07	8.50059e-09
254	Scg5	chr2:113776312-113829091	46.9657	-1.48399	0.281694	2.05038e-06	1.37838e-07
255	Fibin	chr2:110360924-110362993	40.1746	-1.49192	0.305783	1.40731e-05	1.06621e-06
256	Grpr	chrX:163513903-163549736	80.9277	-1.51615	0.228269	7.18955e-10	3.09611e-11
257	Sytl2	chr7:90302354-90410719	141.348	-1.52077	0.18539	8.49293e-15	2.34332e-16
258	Spp1	chr5:104435110-104441053	34834.7	-1.55148	0.055903	2.6214e-166	1.59842e-169
259	AW551984	chr9:39587395-39604124	1687.78	-1.56709	0.0740558	7.16711e-97	2.1851e-99
260	Fam135b	chr15:71445677-71727838	193.242	-1.59012	0.14763	2.96368e-25	4.72111e-27
261	Cytip	chr2:58129138-58160122	102.571	-1.61591	0.205563	1.26063e-13	3.81455e-15
262	9130024F11Rik	chr1:56971468-56975196	83.3425	-1.6311	0.217669	1.98634e-12	6.70693e-14
263	Sulf2	chr2:166073898-166155683	233.314	-1.65373	0.138834	8.77897e-31	1.03046e-32
264	St3gal1	chr15:67102874-67176882	2141.72	-1.66654	0.0635195	1.10704e-148	1.01254e-151
265	Catip	chr1:74362107-74369321	76.4173	-1.67387	0.225887	3.65182e-12	1.26088e-13
266	Dkk2	chr3:132085291-132180304	194.468	-1.67472	0.154479	1.3999e-25	2.19802e-27
267	Kcnk10	chr12:98433993-98577940	244.878	-1.67814	0.137842	3.72385e-32	4.25745e-34
268	Tusc1	chr4:93334147-93335511	59.0785	-1.69902	0.268957	5.60516e-09	2.66587e-10
269	Rgcc	chr14:79288749-79301635	74.9805	-1.73082	0.233475	3.57585e-12	1.23192e-13
270	H19	chr7:142575529-142578146	493.296	-1.73264	0.106097	1.08621e-57	5.96089e-60
271	Cxcl1	chr5:90891244-90893115	26.8709	-1.74184	0.387063	7.80193e-05	6.79101e-06
272	Tnc	chr4:63959784-64047015	17780	-1.76153	0.0761875	1.49558e-115	2.8498e-118
273	Mapkapk3	chr9:107254926-107289877	683.271	-1.77814	0.0896684	4.37529e-85	1.63406e-87
274	Ptgfr	chr3:151798609-151837528	2483.86	-1.78641	0.0829596	2.75947e-100	7.57172e-103
275	Il18rap	chr1:40515361-40551705	144.551	-1.79093	0.177919	4.23281e-22	7.80747e-24
276	Has2	chr15:56665626-56694546	1236.24	-1.79856	0.0829006	8.74712e-102	2.26678e-104
277	4833427G06Rik	chr9:51081312-51102078	24.2084	-1.81975	0.404625	7.88295e-05	6.87955e-06
278	Dcn	chr10:97479499-97518162	2705.2	-1.86953	0.0677113	1.22049e-164	8.37226e-168
279	Slc17a7	chr7:45163920-45176139	38.8446	-1.88487	0.317063	5.21059e-08	2.76813e-09
280	Ramp3	chr11:6650147-6677475	862.801	-1.89481	0.0870442	1.89831e-102	4.63003e-105
281	Crabp1	chr9:54764747-54773110	1898.86	-1.91808	0.0801468	9.80504e-124	1.41994e-126
282	Serpine2	chr1:79794320-79858665	930.26	-1.96637	0.0826904	3.53909e-122	5.39496e-125
283	Pkp2	chr16:16213344-16272712	39.2019	-2.05637	0.32297	4.09724e-09	1.92683e-10
284	Lum	chr10:97565500-97572703	857.831	-2.06135	0.0893571	4.81942e-115	9.55068e-118
285	Ptgir	chr7:16906489-16910905	44.7918	-2.06484	0.31039	6.74334e-10	2.8834e-11
286	Tnn	chr1:160085031-160153575	184.308	-2.1616	0.161316	6.46679e-39	6.06261e-41
287	Cxcl5	chr5:90759297-90761625	188.766	-2.22326	0.169232	2.04549e-37	2.01119e-39
288	Fcrlb	chr1:170907272-170912941	17.8873	-2.24935	0.486097	4.4418e-05	3.70345e-06
289	Sfrp2	chr3:83766320-83774314	802.452	-2.27087	0.0922674	7.72735e-131	9.4236e-134
290	Osbp2	chr11:3703730-3863903	450.55	-2.39249	0.112256	3.06072e-98	8.6316e-101
291	Rgag4	chrX:101849384-102092055	57.7487	-2.41268	0.283344	6.48454e-16	1.66562e-17
292	Gpr149	chr3:62529962-62605140	118.876	-2.45133	0.211763	4.16689e-29	5.46269e-31
293	4930550L24Rik	chrX:58911460-58920304	94.6108	-2.46699	0.224229	2.43642e-26	3.73262e-28
294	Rtl1	chr12:109590168-109595403	85.7822	-2.55555	0.249246	6.5351e-23	1.14563e-24
295	Igf1	chr10:87859055-87937047	215.165	-2.60718	0.15748	2.73611e-59	1.45981e-61
296	Agtr2	chrX:21484623-21488833	32.1144	-2.97873	0.411577	1.27709e-11	4.57495e-13
297	Lmcd1	chr6:112273757-112330423	28.659	-3.13282	0.447667	6.75395e-11	2.59451e-12
298	Sparcl1	chr5:104079108-104114088	488.696	-3.39491	0.125077	3.70217e-159	3.10395e-162
299	Cck	chr9:121489823-121495694	41.3114	-3.71443	0.42837	1.75522e-16	4.28102e-18
300	Vip	chr10:5639217-5647614	235.796	-4.23628	0.209954	4.24903e-88	1.55452e-90

## Sheet: Table A. Intersected
Table A. List of differentially expressed genes in NIH3T3 cells expressing Foxc1 or pLXSH empty vector control.
DESeq2 CuffDiff intersected:
			DESeq2:		CuffDiff:
#	Gene	Locus	log2 ratio	q value	log2 ratio	q value
1	Arhgap36	chrX:49470449-49500250	11.2152	1.31341e-19	12.78	0.000483
2	Anxa10	chr8:62057041-62123193	10.4549	5.34603e-17	12.79	0.000483
3	Kng1	chr16:23058299-23082078	9.29096	2.80526e-13	11.47	0.000483
4	Glra3	chr8:55940824-56125352	7.59648	1.46921e-08	10.09	0.000483
5	E330011O21Rik	chr16:78250862-78255454	7.52932	2.16549e-08	10.94	0.000483
6	Vnn1	chr10:23894687-23905343	6.38911	2.5236e-121	6.42	0.000483
7	Akr1c18	chr13:4132626-4150631	5.91898	2.33248e-88	5.89	0.000483
8	Wnt2	chr6:17988939-18030445	5.86434	6.45096e-41	5.82	0.000483
9	Il33	chr19:29925113-29960715	5.15102	5.14987e-21	5.11	0.00287
10	Agt	chr8:124556586-124569707	4.91287	1.10279e-52	4.87	0.000483
11	Itih2	chr2:10094590-10130683	4.89499	1.33338e-82	4.88	0.000483
12	Foxc1	chr13:31806645-31810635	4.86276	0	4.86	0.000483
13	Col10a1	chr10:34303611-34418528	4.56489	0	4.59	0.000483
14	Il20ra	chr10:19712586-19760053	4.11552	1.98238e-53	4.1	0.000483
15	Ogn	chr13:49464058-49652731	3.71502	0	3.71	0.000483
16	Apba1	chr19:23758875-23949597	3.60034	0	3.58	0.000483
17	Slc4a4	chr5:88887259-89239656	3.58453	2.01411e-40	3.63	0.000483
18	Itgbl1	chr14:123660139-123974079	3.49936	2.3679e-134	3.49	0.000483
19	Ifit3b	chr19:34607956-34613401	3.42446	2.2862e-09	3.53	0.00494
20	Itga1	chr13:114958080-115101964	3.37555	5.18178e-109	3.35	0.000483
21	Camk1g	chr1:193346345-193370282	3.32812	9.11943e-23	3.29	0.000483
22	Ifi47	chr11:49037659-49135387	3.31237	7.74399e-11	3.3	0.000483
23	Hid1	chr11:115347708-115367719	3.25944	1.39892e-95	3.24	0.000483
24	Krt15	chr11:100131758-100135949	3.20138	5.06841e-24	3.18	0.000483
25	Pdk4	chr6:5483350-5496278	3.16655	0	3.17	0.000483
26	Rspo2	chr15:43020794-43170818	3.15321	4.42533e-46	3.19	0.000483
27	Fam20a	chr11:109672925-109722256	3.07881	4.27492e-89	3.05	0.000483
28	Nlrp2	chr7:5298546-5360682	3.0111	4.73791e-20	2.96	0.000483
29	C430002N11Rik	chr9:96765561-96774397	2.88645	1.30262e-07	2.84	0.000483
30	Myh14	chr7:44605802-44670843	2.87147	2.36759e-34	2.86	0.000483
31	Omd	chr13:49464058-49652731	2.86399	4.88874e-48	2.8	0.000483
32	Sulf1	chr1:12692429-12860372	2.84512	1.03621e-136	2.85	0.000483
33	Rasgef1b	chr5:99217419-99252927	2.82283	1.20649e-24	2.81	0.000483
34	Pgbd5	chr8:124369048-124433936	2.7837	2.16221e-65	2.78	0.000483
35	Scara5	chr14:65666402-65764826	2.75914	9.57219e-27	2.76	0.000483
36	Dio2	chr12:90724551-90738438	2.72267	9.25019e-189	2.73	0.000483
37	Ifit3	chr19:34583528-34588982	2.72035	7.3991e-12	2.72	0.000483
38	Srpx2	chrX:133908424-133932446	2.50074	1.15697e-42	2.48	0.000483
39	Pkia	chr3:7366603-7445365	2.49534	9.68959e-80	2.52	0.000483
40	Plscr2	chr9:92275601-92297752	2.4589	8.59972e-21	2.46	0.000483
41	Adra1b	chr11:43774604-43901237	2.37717	6.12954e-22	2.38	0.000483
42	Napsa	chr7:44572444-44586846	2.36017	4.65836e-07	2.53	0.000483
43	Aldh3a1	chr11:61208741-61218416	2.27878	3.83004e-49	2.3	0.000483
44	Gdf5	chr2:155941024-155945364	2.2693	3.45189e-40	2.28	0.000483
45	Col11a1	chr3:114030539-114220326	2.23582	9.04401e-133	2.23	0.000483
46	8430408G22Rik	chr6:116633007-116673836	2.1433	5.32495e-05	2.15	0.00174
47	C1qtnf1	chr11:118428456-118454995	2.11041	4.33928e-43	2.12	0.000483
48	Ror1	chr4:100095790-100442545	2.10513	9.8988e-56	2.16	0.000483
49	Postn	chr3:54361106-54391041	2.08208	2.77676e-41	2.09	0.000483
50	Nr3c2	chr8:76902507-77243639	2.07928	1.74319e-11	2.15	0.000483
51	Enpp2	chr15:54838678-54920146	2.0559	1.44596e-17	2.06	0.000483
52	Sorcs2	chr5:36017180-36398139	2.02595	2.13344e-49	1.99	0.000483
53	Tpd52l1	chr10:31332379-31445921	1.95213	4.2309e-05	2.14	0.000483
54	Adamts6	chr13:104287872-104494763	1.93985	1.21433e-23	1.93	0.000483
55	Maf	chr8:115703252-115706894	1.87884	5.6787e-27	1.87	0.000483
56	Fhl1	chrX:56731760-56793346	1.87865	8.50337e-07	1.86	0.000483
57	Aspg	chr12:112106682-112127573	1.84457	2.83033e-25	1.86	0.000483
58	Mtss1	chr15:58941233-59082026	1.83015	1.72403e-11	1.86	0.000483
59	Wisp2	chr2:163820833-163833147	1.80473	2.19182e-172	1.8	0.000483
60	Kcnh5	chr12:74897216-75177332	1.7681	4.03855e-13	1.77	0.000483
61	Fam213a	chr14:40993739-41013775	1.75031	1.55706e-60	1.74	0.000483
62	Msln	chr17:25748612-25754327	1.73752	1.76637e-63	1.72	0.000483
63	Vamp5	chr6:72368048-72380468	1.73097	4.21535e-27	1.73	0.000483
64	Tgfb2	chr1:186623185-186705992	1.70849	3.12744e-50	1.71	0.000483
65	Fjx1	chr2:102449365-102451792	1.7042	3.257e-10	1.69	0.000483
66	Aspn	chr13:49464058-49652731	1.69527	2.12658e-21	1.69	0.000483
67	Sfrp1	chr8:23411501-23449632	1.68962	1.52634e-82	1.69	0.000483
68	Ahr	chr12:35497978-35534989	1.68187	6.54295e-114	1.68	0.000483
69	Rnf43	chr11:87663086-87735539	1.67977	2.2291e-29	1.61	0.000483
70	Lhx8	chr3:154306293-154330560	1.64966	4.48182e-16	1.65	0.000483
71	Loxl4	chr19:42592278-42612806	1.63379	5.94422e-102	1.64	0.000483
72	Fst	chr13:114452261-114458951	1.5916	5.15569e-16	1.6	0.000483
73	Brinp3	chr1:146495665-146902472	1.58529	2.76448e-22	1.55	0.000483
74	S100a16	chr3:90541222-90543151	1.58388	0.00133371	1.58	0.000483
75	Adgrg6	chr10:14402584-14545036	1.58208	1.58763e-20	1.62	0.000483
76	2010111I01Rik	chr13:62964892-63431745	1.57983	2.32448e-60	1.58	0.000483
77	Actr3b	chr5:25760025-25850341	1.57809	6.00431e-15	1.47	0.000483
78	Gadd45a	chr6:67035095-67080652	1.57628	7.67087e-44	1.6	0.000483
79	Alcam	chr16:52248995-52452997	1.57612	9.17008e-118	1.58	0.000483
80	Klf4	chr4:55527136-55532475	1.56872	1.96431e-104	1.57	0.000483
81	Ly6a	chr15:74994876-74998031	1.56815	2.5672e-38	1.58	0.000483
82	Cped1	chr6:21985909-22255606	1.56591	3.18783e-64	1.57	0.000483
83	Mfap3l	chr8:60632824-60676731	1.55389	5.49611e-41	1.54	0.000483
84	Etl4	chr2:20289912-20810535	1.54931	2.39856e-37	1.58	0.000483
85	Rerg	chr6:137054824-137170496	1.54552	5.63075e-13	1.49	0.000483
86	Ctgf	chr10:24595441-24598682	1.53182	5.46905e-160	1.53	0.000483
87	Cyp1b1	chr17:79706952-79715041	1.53165	1.4489e-72	1.54	0.000483
88	Gjb4	chr4:127351085-127354081	1.53046	1.60534e-12	1.56	0.000483
89	Rbp1	chr9:98422960-98446550	1.5246	6.85207e-104	1.51	0.000483
90	Efnb2	chr8:8617438-8660773	1.52155	5.52435e-106	1.52	0.000483
91	Rbp2	chr9:98490536-98509771	1.50587	0.00496832	1.46	0.0025
92	Nrep	chr18:33437018-33464029	1.50167	1.01e-38	1.5	0.000483
93	2610035D17Rik	chr11:113043905-113201838	1.50111	8.87461e-08	1.63	0.000483
94	Thrb	chr14:17660959-18038088	1.48945	7.78201e-29	1.48	0.000483
95	Tmem176b	chr6:48833810-48841374	1.48886	4.06971e-09	1.49	0.000483
96	Gm14005	chr2:128298662-128429351	1.48677	8.07326e-09	1.62	0.000483
97	Megf6	chr4:154170712-154275721	1.48655	1.45757e-22	1.46	0.000483
98	Dusp4	chr8:34807609-34819894	1.4608	1.50333e-23	1.47	0.000483
99	Cdsn	chr17:35552127-35557180	1.43471	1.2571e-73	1.43	0.000483
100	Tle4	chr19:14448071-14598183	1.41792	4.09076e-47	1.44	0.000483
101	Fzd1	chr5:4753838-4758216	1.4137	2.21567e-128	1.41	0.000483
102	Dusp1	chr17:26505590-26508472	1.40467	1.49286e-45	1.41	0.000483
103	Irgm1	chr11:48865248-48871346	1.39996	5.7499e-40	1.39	0.000483
104	Pam	chr1:97821093-98095632	1.38699	1.78344e-129	1.37	0.000483
105	Cpeb3	chr19:37021290-37207471	1.38137	1.16672e-22	1.37	0.000483
106	Agpat9	chr5:100846228-100899102	1.35752	6.53157e-07	1.33	0.000483
107	Pde8b	chr13:95024104-95250304	1.34983	2.87565e-30	1.36	0.000483
108	Pld1	chr3:27938679-28133362	1.34724	7.08788e-15	1.36	0.000483
109	Gchfr	chr2:119167787-119172389	1.34269	5.77327e-24	1.35	0.000483
110	Fam43a	chr16:30599722-30602797	1.34218	1.73649e-67	1.34	0.000483
111	Il16	chr7:83643062-83735490	1.3383	9.64438e-09	1.33	0.000483
112	Nrgn	chr9:37544492-37552745	1.32732	0.00107622	1.34	0.000483
113	Zdhhc2	chr8:40423814-40484842	1.32587	6.35292e-30	1.32	0.000483
114	Fam107b	chr2:3713457-3782134	1.32357	6.1269e-75	1.32	0.000483
115	Smoc2	chr17:14279505-14404790	1.31946	1.03504e-45	1.32	0.000483
116	Dpysl3	chr18:43320978-43438286	1.31839	5.05539e-94	1.32	0.000483
117	Fam110c	chr12:31073967-31079940	1.31216	7.69435e-19	1.31	0.000483
118	Sh3bp4	chr1:89070461-89153793	1.30637	7.76979e-43	1.31	0.000483
119	Pdlim2	chr14:70164217-70177672	1.30531	1.13277e-40	1.26	0.000483
120	Sdpr	chr1:51218385-51333779	1.29595	1.72413e-96	1.3	0.000483
121	Tec	chr5:72755717-72868448	1.2922	2.45288e-05	1.23	0.000483
122	Sema5a	chr15:32244812-32696341	1.28828	2.48119e-45	1.28	0.000483
123	Ltbp2	chr12:84783211-84879755	1.28828	6.38249e-50	1.29	0.000483
124	Fgd3	chr13:49263109-49309208	1.27786	1.82787e-13	1.27	0.000483
125	Lrrc8d	chr5:105699968-105815215	1.27324	3.97218e-21	1.25	0.000483
126	Rgs20	chr1:4909575-5070285	1.27231	1.47232e-28	1.29	0.000483
127	Gpc1	chr1:92831685-92860196	1.27074	1.10313e-100	1.27	0.000483
128	Grk5	chr19:60889748-61140840	1.26571	1.94341e-23	1.28	0.000483
129	Cpe	chr8:64592550-64693040	1.25317	7.26977e-121	1.26	0.000483
130	Phldb2	chr16:45746230-45844378	1.24483	1.41494e-95	1.24	0.000483
131	Arhgap31	chr16:38598342-38713035	1.23942	3.59362e-44	1.23	0.000483
132	Gjb3	chr4:127325234-127330836	1.23919	5.61855e-34	1.23	0.000483
133	Amigo2	chr15:97244073-97385691	1.23843	1.67945e-45	1.23	0.000483
134	Dmxl2	chr9:54365157-54501626	1.23828	6.88637e-21	1.25	0.000483
135	Tmem176a	chr6:48841482-48845364	1.22728	0.000653279	1.16	0.000483
136	Slc7a2	chr8:40862366-40922070	1.22299	1.03806e-26	1.22	0.000483
137	Heg1	chr16:33684465-33768195	1.22028	2.091e-39	1.22	0.000483
138	Capn5	chr7:98121558-98184799	1.21664	3.58293e-14	1.2	0.000483
139	Tgm2	chr2:158116404-158146392	1.21589	1.81475e-23	1.21	0.000483
140	Col12a1	chr9:79598986-79718722	1.2096	3.68805e-07	1.21	0.000483
141	Chrd	chr16:20724453-20742384	1.20563	1.75684e-13	1.2	0.000483
142	Slit2	chr5:47983154-48306282	1.20392	1.04867e-53	1.2	0.000483
143	AI606473	chr3:154330820-154334687	1.20359	7.02159e-15	1.19	0.000483
144	Gli1	chr10:127321963-127341579	1.20339	2.11484e-05	1.23	0.000483
145	Lxn	chr3:67430114-67475068	1.20059	3.51977e-84	1.2	0.000483
146	Rhou	chr8:123653928-123663880	1.1989	2.60137e-70	1.2	0.000483
147	Col5a3	chr9:20770049-20815034	1.19794	2.24135e-30	1.18	0.000483
148	Rab27b	chr18:69979130-70141605	1.19627	8.34903e-24	1.17	0.000483
149	Cryab	chr9:50751071-50756635	1.19589	6.19384e-45	1.26	0.000483
150	Eva1c	chr16:90830858-90904885	1.19078	6.4945e-10	1.22	0.000483
151	Ly6c1	chr15:75044017-75048837	1.1871	3.60235e-09	1.2	0.000483
152	Adrb2	chr18:62177712-62179981	1.18564	0.000317111	1.16	0.000483
153	Bicc1	chr10:70925095-71159634	1.17717	1.51834e-70	1.18	0.000483
154	Gstt1	chr10:75783812-75798584	1.17604	2.78472e-06	1.14	0.000483
155	Mmp28	chr11:83441875-83462961	1.16358	9.98061e-06	1.14	0.000483
156	Sepp1	chr15:3270766-3280508	1.16303	5.91441e-24	1.17	0.000483
157	Irs1	chr1:82233104-82291439	1.16026	2.34828e-49	1.16	0.000483
158	Gdpd5	chr7:99381548-99460984	1.1576	1.62387e-06	1.15	0.000483
159	Asb4	chr6:5383385-5433021	1.15308	1.58769e-39	1.15	0.000483
160	Ssfa2	chr2:79635424-79672964	1.13902	5.2495e-36	1.15	0.000483
161	Kalrn	chr16:33969072-34514027	1.13879	6.60486e-24	1.14	0.000483
162	Kif13b	chr14:64652530-64806296	1.13658	1.76567e-23	1.15	0.000483
163	Anpep	chr7:79821802-79842352	1.1316	1.01756e-09	1.13	0.000483
164	Phactr1	chr13:42680798-43138512	1.13137	1.30828e-34	1.11	0.000483
165	Arrb1	chr7:99535485-99606771	1.12646	2.94299e-18	1.14	0.000483
166	Atp10d	chr5:72203328-72298771	1.12025	1.1651e-21	1.11	0.000483
167	Fgfbp3	chr19:36917549-36919599	1.12009	4.69861e-17	1.09	0.000483
168	Trim7	chr11:48826137-48850195	1.09556	0.00151513	1.21	0.000483
169	Angpt1	chr15:42424666-42676977	1.08623	2.05594e-13	1.09	0.000483
170	Col28a1	chr6:7997807-8192617	1.08346	1.18965e-11	1.09	0.000483
171	Pde3a	chr6:141249268-141499351	1.08049	1.73284e-14	1.09	0.000483
172	Aox1	chr1:58029968-58106410	1.07703	3.95174e-12	1.08	0.000483
173	C1rl	chr6:124493112-124510643	1.0748	1.56555e-05	1.07	0.000483
174	Far1	chr7:113513833-113570888	1.07392	6.84838e-53	1.07	0.000483
175	Ptx3	chr3:66053557-66296837	1.07176	5.62009e-93	1.07	0.000483
176	Ddr1	chr17:35681566-35704139	1.0638	2.618e-42	1.07	0.000483
177	Dab2	chr15:6299788-6440709	1.06254	1.23616e-61	1.06	0.000483
178	Paqr8	chr1:20890621-20938756	1.06073	2.60258e-07	1.06	0.000483
179	Ppp1r3c	chr19:36731730-36736604	1.06055	5.3259e-09	1.07	0.000483
180	Rapgef3	chr15:97744769-97767666	1.05545	3.88823e-13	1.04	0.000483
181	Stx11	chr10:12939982-12964259	1.05114	1.18155e-11	1.04	0.000483
182	Bpgm	chr6:34476355-34505610	1.04965	2.21472e-27	1.08	0.000483
183	Thbs1	chr2:118111921-118127133	1.04618	6.62391e-55	1.05	0.000483
184	9930012K11Rik	chr14:70154404-70159502	1.04565	1.33195e-11	1.05	0.000483
185	Ngf	chr3:102469918-102521013	1.02818	5.01278e-12	1.01	0.000483
186	Glcci1	chr6:8509599-8597549	1.02676	4.20856e-29	1.03	0.000483
187	Dock4	chr12:40446052-40846488	1.01757	8.45819e-11	1.03	0.000483
188	Gpr85	chr6:13835073-13839848	1.01457	9.3126e-26	1	0.000483
189	Mocos	chr18:24653690-24701556	1.01012	4.43848e-07	1.01	0.000483
190	Cemip	chr7:83932856-84086505	1.00579	5.79521e-37	1.01	0.000483
191	Cthrc1	chr15:39076931-39087119	1.00236	7.40044e-50	1	0.000483
192	Per2	chr1:91415981-91459328	1.00035	1.9445e-15	1.02	0.000483
193	Ugt1a7c	chr1:88055410-88220002	-1.00808	6.93992e-11	-1	0.000483
194	Unc13b	chr4:43058983-43264887	-1.00887	2.66495e-06	-1	0.000483
195	Ablim1	chr19:57033263-57216032	-1.01575	1.05853e-10	-1.04	0.000483
196	Slc27a6	chr18:58556239-58612869	-1.02526	6.79443e-16	-1.03	0.000483
197	Slc16a9	chr10:70245275-70285951	-1.03081	8.65965e-05	-1.04	0.000483
198	P2rx3	chr2:84996551-85035834	-1.031	1.12164e-16	-1.06	0.000483
199	Casp12	chr9:5345475-5373034	-1.03409	1.96136e-27	-1.03	0.000483
200	Car13	chr3:14641726-14663002	-1.04315	4.16567e-31	-1.05	0.000483
201	Mcam	chr9:44134657-44142726	-1.04457	9.27636e-07	-1.05	0.000483
202	Il1rl1	chr1:40429569-40465414	-1.04484	3.07039e-97	-1.06	0.000483
203	Cx3cl1	chr8:94772179-94782426	-1.04703	6.28649e-38	-1.05	0.000483
204	Notch1	chr2:26457901-26503822	-1.05879	6.67046e-18	-1.05	0.000483
205	Dnmt3l	chr10:78030021-78063622	-1.0604	2.38798e-05	-1.12	0.000483
206	Myo1d	chr11:80482126-80780025	-1.06224	3.7488e-40	-1.07	0.000483
207	Foxs1	chr2:152931897-152933208	-1.07568	0.000269378	-1.07	0.000483
208	Casp4	chr9:5308848-5336791	-1.08333	2.67833e-10	-1.06	0.000483
209	Il11	chr7:4772377-4782857	-1.08805	2.30331e-19	-1.08	0.000483
210	Sox5	chr6:143828424-144209568	-1.10819	2.5967e-22	-1.13	0.000483
211	Gm2115	chr7:84528953-84578339	-1.10866	1.84194e-46	-1.11	0.000483
212	Cacna1i	chr15:80287237-80398292	-1.11164	2.01154e-11	-1.1	0.000483
213	Ptn	chr6:36715662-36811361	-1.11594	1.48851e-71	-1.1	0.000483
214	Cish	chr9:107296688-107301961	-1.12134	3.58478e-24	-1.12	0.000483
215	Abcg2	chr6:58596671-58692451	-1.16411	6.59115e-33	-1.18	0.000483
216	Trem2	chr17:48346400-48352276	-1.17538	1.14949e-06	-1.19	0.000483
217	Foxo6	chr4:120267077-120287261	-1.1837	0.000582099	-1.16	0.000483
218	Mmp9	chr2:164948218-164955849	-1.18742	4.11101e-08	-1.2	0.000483
219	Foxl1	chr8:121127684-121130644	-1.20955	1.18351e-07	-1.19	0.000483
220	Hspb7	chr4:141420778-141425310	-1.21379	0.000167378	-1.23	0.000483
221	Rcan2	chr17:43801850-44039516	-1.21384	1.75654e-30	-1.22	0.000483
222	Ank3	chr10:69533707-70027436	-1.22013	1.64095e-49	-1.21	0.000483
223	Txnip	chr3:96555767-96566801	-1.24686	2.84428e-62	-1.25	0.000483
224	Diras2	chr13:52504374-52530836	-1.24782	4.15691e-11	-1.25	0.000483
225	Kcnab1	chr3:65109367-65378225	-1.24791	1.76884e-13	-1.24	0.000483
226	Mycn	chr12:12936092-12941836	-1.2863	6.8475e-11	-1.28	0.000483
227	Hivep3	chr4:119814677-120135411	-1.29638	1.09248e-21	-1.31	0.000483
228	Smarca1	chrX:47809369-47892552	-1.30941	1.46924e-12	-1.34	0.000483
229	Acot11	chr4:106733914-106799831	-1.312	4.00234e-11	-1.32	0.000483
230	Fxyd1	chr7:31051677-31055656	-1.31329	5.02607e-05	-1.34	0.000483
231	Cd24a	chr10:43579168-43584265	-1.31767	1.26035e-97	-1.32	0.000483
232	Snap25	chr2:136713449-136782428	-1.33343	1.22881e-10	-1.31	0.000483
233	Dact1	chr12:71309883-71320107	-1.38745	2.94402e-29	-1.39	0.000483
234	Sphk1	chr11:116531910-116536675	-1.40999	5.84072e-12	-1.39	0.000483
235	Lpl	chr8:68880554-68906932	-1.41185	1.52932e-32	-1.41	0.000483
236	Cd34	chr1:194938820-194976959	-1.43266	3.73969e-118	-1.43	0.000483
237	Eya1	chr1:14168957-14310199	-1.4424	1.07474e-14	-1.44	0.000483
238	Lvrn	chr18:46850038-46905446	-1.45832	1.51945e-07	-1.42	0.000483
239	Scg5	chr2:113776312-113829091	-1.48399	2.05038e-06	-1.44	0.000483
240	Fibin	chr2:110360924-110362993	-1.49192	1.40731e-05	-1.49	0.000483
241	Grpr	chrX:163513903-163549736	-1.51615	7.18955e-10	-1.51	0.000483
242	Sytl2	chr7:90302354-90410719	-1.52077	8.49293e-15	-1.55	0.000483
243	Spp1	chr5:104435110-104441053	-1.55148	2.6214e-166	-1.54	0.000483
244	AW551984	chr9:39587395-39604124	-1.56709	7.16711e-97	-1.57	0.000483
245	Fam135b	chr15:71445677-71727838	-1.59012	2.96368e-25	-1.59	0.000483
246	Cytip	chr2:58129138-58160122	-1.61591	1.26063e-13	-1.61	0.000483
247	9130024F11Rik	chr1:56971468-56975196	-1.6311	1.98634e-12	-1.38	0.000483
248	Sulf2	chr2:166073898-166155683	-1.65373	8.77897e-31	-1.65	0.000483
249	St3gal1	chr15:67102874-67176882	-1.66654	1.10704e-148	-1.67	0.000483
250	Catip	chr1:74362107-74369321	-1.67387	3.65182e-12	-1.65	0.000483
251	Dkk2	chr3:132085291-132180304	-1.67472	1.3999e-25	-1.65	0.000483
252	Kcnk10	chr12:98433993-98577940	-1.67814	3.72385e-32	-1.68	0.000483
253	Tusc1	chr4:93334147-93335511	-1.69902	5.60516e-09	-1.72	0.000483
254	Rgcc	chr14:79288749-79301635	-1.73082	3.57585e-12	-1.74	0.000483
255	H19	chr7:142575529-142578146	-1.73264	1.08621e-57	-1.74	0.000483
256	Cxcl1	chr5:90891244-90893115	-1.74184	7.80193e-05	-1.71	0.000483
257	Tnc	chr4:63959784-64047015	-1.76153	1.49558e-115	-1.76	0.000483
258	Mapkapk3	chr9:107254926-107289877	-1.77814	4.37529e-85	-1.77	0.000483
259	Ptgfr	chr3:151798609-151837528	-1.78641	2.75947e-100	-1.78	0.000483
260	Il18rap	chr1:40515361-40551705	-1.79093	4.23281e-22	-1.79	0.000483
261	Has2	chr15:56665626-56694546	-1.79856	8.74712e-102	-1.8	0.000483
262	4833427G06Rik	chr9:51081312-51102078	-1.81975	7.88295e-05	-1.82	0.000483
263	Dcn	chr10:97479499-97518162	-1.86953	1.22049e-164	-1.87	0.000483
264	Slc17a7	chr7:45163920-45176139	-1.88487	5.21059e-08	-1.85	0.000483
265	Ramp3	chr11:6650147-6677475	-1.89481	1.89831e-102	-1.89	0.000483
266	Crabp1	chr9:54764747-54773110	-1.91808	9.80504e-124	-1.92	0.000483
267	Serpine2	chr1:79794320-79858665	-1.96637	3.53909e-122	-1.97	0.000483
268	Pkp2	chr16:16213344-16272712	-2.05637	4.09724e-09	-2.07	0.000483
269	Lum	chr10:97565500-97572703	-2.06135	4.81942e-115	-2.06	0.000483
270	Ptgir	chr7:16906489-16910905	-2.06484	6.74334e-10	-2.05	0.000483
271	Tnn	chr1:160085031-160153575	-2.1616	6.46679e-39	-2.16	0.000483
272	Cxcl5	chr5:90759297-90761625	-2.22326	2.04549e-37	-2.25	0.000483
273	Fcrlb	chr1:170907272-170912941	-2.24935	4.4418e-05	-2.3	0.00212
274	Sfrp2	chr3:83766320-83774314	-2.27087	7.72735e-131	-2.27	0.000483
275	Osbp2	chr11:3703730-3863903	-2.39249	3.06072e-98	-2.38	0.000483
276	Rgag4	chrX:101849384-102092055	-2.41268	6.48454e-16	-2.42	0.000483
277	Gpr149	chr3:62529962-62605140	-2.45133	4.16689e-29	-2.47	0.000483
278	4930550L24Rik	chrX:58911460-58920304	-2.46699	2.43642e-26	-2.46	0.000483
279	Rtl1	chr12:109590168-109595403	-2.55555	6.5351e-23	-2.53	0.000483
280	Igf1	chr10:87859055-87937047	-2.60718	2.73611e-59	-2.8	0.000483
281	Agtr2	chrX:21484623-21488833	-2.97873	1.27709e-11	-2.98	0.000483
282	Lmcd1	chr6:112273757-112330423	-3.13282	6.75395e-11	-3.09	0.000483
283	Sparcl1	chr5:104079108-104114088	-3.39491	3.70217e-159	-3.4	0.000483
284	Cck	chr9:121489823-121495694	-3.71443	1.75522e-16	-3.76	0.000483
285	Vip	chr10:5639217-5647614	-4.23628	4.24903e-88	-4.22	0.000483

## Sheet: Table B. Legend
Table B. Functional profiling of the list of differentially expressed genes from File S1.
Gene set enrichment analysis performed using Enrichr platform [https://maayanlab.cloud/Enrichr/]
Results of annotation using different gene set libraries and databases are shown in separate tabs.
Significant gene set enrichment (FDR-adjusted P-values < 0.05) shown in blue
Gene set enrichment (non-adjusted P-value < 0.05) shown in gray
Tab	Gene set library / database
Minimum 3 genes fom the list associated with each term cut-off:
Elsevier	Elsevier Pathway Collection
MSigDB	MSigDB (Molecular Signature Database) hallmark gene sets
JL Disease	Jensen Lab Diseases (disease-gene associations mined from literature)
JL Tissue	Jensen Lab Tissues (tissue expression database)
MGA	Mouse Gene Atlas (expression in mouse cells and tissues)
MGI	MGI (Mouse Genome Informatics) mammalian phenotypes level 4
Wiki Mouse	WikiPathways Mouse
Wiki Human	WikiPathways Human
GO	Gene Ontology Resource (biological process)
GWAS	GWAS Catalog (The NHGRI-EBI catalog of human genome-wide association studies)
Minimum 5 genes from the list associated with each term cut-off:
Localisation	Jensen Lab Compartments (subcellular localisation database)

## Sheet: Table B. Elsevier
#	Term	Overlap	P-value	Adjusted P-value	Odds Ratio	Combined Score	Genes
1	Proteins Involved in Arterial Hypertension	17/255	1.62813e-07	0.000123575	5.1911	81.1403	RAMP3;ANGPT1;LPL;IGF1;AHR;ADRB2;NGF;SLC4A4;MMP9;AGT;KNG1;NR3C2;ANPEP;PDE3A;CYP1B1;AGTR2;VIP
2	Proteins Involved in Osteoarthritis	10/86	4.02231e-07	0.000152647	9.39665	138.377	TGFB2;SPP1;COL10A1;PTN;IGF1;MMP9;THBS1;GDF5;ASPN;TGM2
3	Proteins Involved in Myocardial Ischemia	16/252	7.27129e-07	0.000170012	4.90933	69.3893	POSTN;ANGPT1;SPHK1;LPL;ARRB1;IGF1;PTN;MMP9;AGT;KNG1;CXCL5;NR3C2;SPP1;TXNIP;PTX3;VIP
4	Proteins Involved in Endometriosis	16/256	8.95977e-07	0.000170012	4.82652	67.211	IL11;POSTN;TNC;IL16;GSTT1;IGF1;AHR;SULF1;NGF;MMP9;THBS1;DCN;SFRP1;SPP1;SLIT2;ABCG2
5	Proteins Involved in Glaucoma	9/84	3.08855e-06	0.000468842	8.53913	108.343	EFNB2;SFRP1;FOXC1;CASP12;CYP1B1;NGF;SLC4A4;MMP9;TGM2
6	Proteins Involved in Glioma	16/290	4.52614e-06	0.000515432	4.22023	51.9326	DUSP4;TGFB2;DOCK4;NOTCH1;DUSP1;TNC;IGF1;AHR;GRPR;GLI1;NGF;MMP9;KNG1;DCN;MYCN;SPP1
7	Proteins Involved in Dilated Cardiomyopathy	12/167	5.13022e-06	0.000515432	5.54697	67.5641	NOTCH1;TNC;SPP1;AGTR2;ADRB2;IGF1;ADRA1B;MMP9;CRYAB;DCN;AGT;NR3C2
8	Proteins Involved in Medulloblastoma	8/68	5.43275e-06	0.000515432	9.46089	114.695	TGFB2;MYCN;NOTCH1;IRS1;IGF1;GLI1;NGF;MMP9
9	Proteins Involved in Osteoporosis	9/100	1.3086e-05	0.00110358	7.03201	79.0677	IL11;IL1RL1;IL33;TGFB2;IRS1;DUSP1;SPP1;IGF1;AGT
10	Proteins with Altered Expression in Asthma	5/24	1.93099e-05	0.00146562	18.5113	200.938	IL33;POSTN;IGF1;NGF;MMP9
11	Proteins Involved in Pulmonary Hypertension	11/165	2.56558e-05	0.00177025	5.09932	53.9036	ANGPT1;DUSP1;SPP1;CCK;VIP;MMP9;THBS1;KNG1;CX3CL1;DCN;AGT
12	Proteins Involved in Atherosclerosis	12/200	3.15483e-05	0.00199543	4.56558	47.3177	THRB;DUSP1;LPL;CXCL1;PTN;MMP9;THBS1;CX3CL1;AGT;CXCL5;DCN;TGM2
13	SNS Related Adrenal Cortex Response	5/27	3.5415e-05	0.00206769	15.9846	163.816	ADRB2;ADRA1B;NGF;AGT;RAPGEF3
14	Proteins Involved in Melanoma	13/238	3.96478e-05	0.00214948	4.14003	41.9612	POSTN;TGFB2;NOTCH1;MCAM;TNC;IGF1;PTN;GLI1;MMP9;EFNB2;ALCAM;SPP1;TXNIP
15	Epithelial to Mesenchymal Transition in Cancer: Overview	8/90	4.348e-05	0.00220009	6.91485	69.4473	DDR1;FOXC1;NOTCH1;IRS1;TNC;IGF1;GLI1;MMP9
16	Proteins Involved in Age-Related Macular Degeneration	10/148	5.33357e-05	0.00253011	5.15863	50.7553	IL33;ANGPT1;CAPN5;SPP1;COL10A1;IGF1;NGF;MMP9;CRYAB;ABCG2
17	Proteins Involved in Cataract	8/94	5.94506e-05	0.00265429	6.59189	64.1415	ALDH3A1;TGFB2;IRS1;IGF1;SLC4A4;MMP9;CRYAB;TGM2
18	Genes with Mutations Associated with Glaucoma	4/16	6.41921e-05	0.00266188	23.3725	225.629	FOXC1;CYP1B1;LTBP2;SLC4A4
19	Proteins Involved in Neuroblastoma	12/216	6.66348e-05	0.00266188	4.20405	40.4273	EFNB2;MYCN;SPP1;IGF1;PTN;NGF;VIP;MMP9;THBS1;CX3CL1;AGT;KNG1
20	Proteins Involved in Chronic Obstructive Pulmonary Disease	10/170	0.000168981	0.00641284	4.44432	38.6021	NOTCH1;SERPINE2;SPP1;GSTT1;CXCL1;PTX3;ADRB2;SLIT2;NGF;MMP9
21	IL17F Signaling in Bronchial Epithelial Cell in Asthma	4/21	0.000199563	0.00721278	16.494	140.519	IL11;IL33;IL1RL1;IGF1
22	Proteins Involved in Diabetic Nephropathy	10/175	0.000213877	0.00737875	4.30854	36.4076	NOTCH1;SPP1;TXNIP;AGTR2;IGF1;MMP9;THBS1;DCN;AGT;NR3C2
23	Proteins Involved in Glioblastoma	10/178	0.000245333	0.00809599	4.23095	35.1715	MYCN;NOTCH1;ANGPT1;FST;TNC;IGF1;PTN;GLI1;MMP9;CRYAB
24	Proteins Involved in Hypothyroidism	6/63	0.000273106	0.00863699	7.41671	60.859	THRB;DIO2;IGF1;VIP;PAM;NRGN
25	Neuroinflammation in Amyotrophic Lateral Sclerosis	3/10	0.000319031	0.00968579	29.9514	241.115	IGF1;NGF;CX3CL1
26	Glioma Invasion Signaling	6/75	0.000702001	0.020493	6.12311	44.4634	DDR1;EFNB2;ANGPT1;COL11A1;IGF1;MMP9
27	Proteins with Altered Expression in Cancer Metastases	7/106	0.000812388	0.0228371	4.98917	35.5006	DDR1;TGFB2;NOTCH1;TNC;SPP1;GLI1;MMP9
28	P2RXs -> Synaptic Transmission	3/14	0.000927668	0.0234579	19.0561	133.066	SNAP25;P2RX3;SLC17A7
29	Proteins Involved in Prolactinoma	4/31	0.000938038	0.0234579	10.3799	72.3655	IGF1;NGF;VIP;THBS1
30	Proteins Involved in Ulcerative Colitis	8/141	0.000952192	0.0234579	4.25222	29.5816	IL11;IL33;SPP1;TXNIP;GSTT1;CD34;MMP9;KNG1
31	Ca2+ Flux Regulation	7/109	0.000958096	0.0234579	4.84169	33.6525	PTGFR;PTGIR;P2RX3;IRS1;ADRB2;ADRA1B;NGF
32	Proteins Involved in Amyotrophic Lateral Sclerosis	9/181	0.00118899	0.0282015	3.70507	24.9523	PTGFR;CASP4;SCG5;SPP1;CCK;IGF1;MMP9;CRYAB;AGT
33	Proteins Involved in Vascular Dementia	3/16	0.00139739	0.03214	16.1227	105.977	IGF1;AGTR2;NGF
34	Steroids Induced Cataract	5/59	0.00151523	0.0338252	6.50165	42.21	MAF;IRS1;IGF1;MMP9;CRYAB
35	Vitamin C Related Norepinephrine Synthesis	3/17	0.00167905	0.0353999	14.9704	95.6536	ADRB2;ADRA1B;AGT
36	NTRK -> FOXO/MYCN Signaling	3/17	0.00167905	0.0353999	14.9704	95.6536	MYCN;IRS1;NGF
37	ARRB1/ARRB2 and GPCRs Internalization	2/5	0.00196689	0.0403479	46.4358	289.355	GRK5;ARRB1
38	Receptors and Adaptor Proteins Activated in Cancer	7/125	0.00211606	0.0422656	4.18178	25.7522	EFNB2;DDR1;IL11;IRS1;COL11A1;IGF1;PTN
39	Aryl Hydrocarbon Receptor Genomic and non-Genomic Signaling	4/39	0.00224284	0.0436492	8.00407	48.8249	ALDH3A1;MAF;CYP1B1;AHR
40	Renin-Angiotensin-Aldosterone System in Myocardial ischemia	3/19	0.0023428	0.0444546	13.0977	79.3253	AGTR2;AGT;NR3C2
41	Proteins Involved in Alzheimer's Disease	7/130	0.00264038	0.0486512	4.01076	23.8112	NOTCH1;LPL;APBA1;IGF1;NGF;MMP9;TGM2
42	Thyrotropin Releasing Hormone (TRH) Hypothalamic Release in non-Autoimmune Hypothyroidism	3/20	0.0027274	0.0486512	12.3267	72.7816	THRB;DIO2;ADRA1B
43	Neuroblastoma	7/131	0.00275626	0.0486512	3.97821	23.4471	MYCN;NOTCH1;IRS1;IGF1;PTN;GLI1;NGF
44	IGF1R -> ARRB1/ERK1/3 Signaling	2/6	0.00292261	0.0496351	34.8251	203.214	ARRB1;IGF1
45	Proteins Involved in Polycystic Ovary Syndrome	6/99	0.00294279	0.0496351	4.5374	26.4458	IRS1;FST;ADRB2;IGF1;NGF;AGT
46	Graves Ophthalmopathy	4/43	0.00321882	0.0531105	7.18168	41.2138	IRS1;HAS2;IL16;IGF1
47	Proteins with Altered Expression in Cancer-Associated Sustaining of Proliferative Signaling	8/175	0.00369362	0.059648	3.38062	18.9353	EFNB2;DDR1;IL11;NOTCH1;IRS1;IGF1;PTN;GLI1
48	Proteins Involved in Obesity	6/106	0.00412629	0.065247	4.21828	23.1599	NOTCH1;IRS1;SPP1;CCK;IGF1;AGT
49	Integrins in Cancer Cell Motility, Invasion and Survival	5/75	0.00434552	0.0673112	5.01148	27.2555	IRS1;TNC;SPP1;MMP9;THBS1
50	Growth Factor Signaling in Neuroblastoma	4/47	0.00445022	0.0675544	6.51229	35.2628	MYCN;IRS1;IGF1;NGF
51	G-Proteins Signaling in Insulin Secretion in beta-Cell	3/24	0.00464324	0.0691024	9.9767	53.5982	CCK;ADRB2;VIP
52	Hematopoietic Cell Lineage: B-cell (mouse)	4/49	0.00517048	0.0738801	6.22222	32.7587	ALCAM;NOTCH1;ANGPT1;CD34
53	Proteins Involved in Chronic Bronchitis	3/25	0.00522142	0.0738801	9.52273	50.0418	CYP1B1;ADRB2;KNG1
54	Proteins Involved in non-Alcoholic Fatty Liver Disease	8/186	0.00531813	0.0738801	3.16992	16.5997	IRS1;TNC;SPP1;LPL;CXCL1;AHR;IGF1;AGT
55	Proteins with Altered Expression in Glomerulonephritis	2/8	0.00535363	0.0738801	23.2144	121.411	AGT;KNG1
56	Atopic Dermatitis	5/81	0.00602234	0.0816243	4.61443	23.5902	IL1RL1;IL33;MAF;CDSN;PKP2
57	Glutamate Overdose and Aura Effect Caused by Mutations in SLC1A3 Gene	3/27	0.00650274	0.0836934	8.72828	43.9515	SNAP25;SLC17A7;SLC4A4
58	Glutamate Overdose and Aura Effect Overiew	3/27	0.00650274	0.0836934	8.72828	43.9515	SNAP25;SLC17A7;SLC4A4
59	Adrenoceptors Physiological Effects	2/9	0.00681876	0.0836934	19.897	99.2479	ADRB2;ADRA1B
60	GPCRs Desentization	2/9	0.00681876	0.0836934	19.897	99.2479	GRK5;ARRB1
61	IGF1R -> CEBPA/FOXO1A Signaling	2/9	0.00681876	0.0836934	19.897	99.2479	IRS1;IGF1
62	Muscular Dystrophies	4/53	0.00683662	0.0836934	5.71312	28.4826	IRS1;IGF1;MMP9;AGT
63	Proteins Involved in Multiple Sclerosis	4/54	0.00730243	0.0879768	5.59858	27.5425	SPP1;VIP;MMP9;CRYAB
64	Proteins Involved in Glomerulonephritis	6/121	0.00779806	0.0924801	3.66526	17.7908	ITGA1;SPP1;SLIT2;MMP9;CX3CL1;AGT
65	Vasodilation Activation	2/10	0.0084437	0.0977522	17.409	83.1164	PTGIR;ADRB2
66	Smooth Muscle Cell Dysfunction in Pulmonary Hypertension	5/88	0.0085002	0.0977522	4.22375	20.1374	PTGIR;IRS1;TNC;IGF1;MMP9
67	Thyroid Hormones in Adipose Tissue Metabolism	3/30	0.00874753	0.0990951	7.75729	36.7617	THRB;IRS1;LPL
68	Proteins Involved in Myocarditis	8/207	0.0098713	0.106298	2.83236	13.0802	IL33;SPP1;TNC;ADRB2;MMP9;THBS1;AGT;NR3C2
69	Bone Remodeling in Hyperthyroidism	4/59	0.0099452	0.106298	5.08832	23.4605	THRB;COL10A1;IGF1;RAPGEF3
70	Proteins Involved in Ependymoma	2/11	0.0102236	0.106298	15.4739	70.9177	TGFB2;TNC
71	Proteins with Altered Expression in Atopic Dermatitis	2/11	0.0102236	0.106298	15.4739	70.9177	IL33;CDSN
72	Aryl Hydrocarbon Receptor/Tryptophan Metabolites Signaling	2/11	0.0102236	0.106298	15.4739	70.9177	CYP1B1;AHR
73	Dioxin Role in Endometriosis	2/11	0.0102236	0.106298	15.4739	70.9177	CYP1B1;AHR
74	Ovulation Block	3/32	0.0104661	0.106653	7.22157	32.9276	IRS1;FST;IGF1
75	Proteins Involved in Multiple Myeloma	4/60	0.0105389	0.106653	4.9972	22.7507	PTN;IGF1;CD34;MMP9
76	DDR1 -> NF-kB Signaling	2/12	0.0121538	0.118266	13.9258	61.4143	DDR1;COL11A1
77	InsulinR -> CTNNB/FOXA/FOXO Signaling	2/12	0.0121538	0.118266	13.9258	61.4143	IRS1;FOXO6
78	FOXO3 and PTEN Inactivation in Premature Ovarian Failure (Mouse Model)	2/12	0.0121538	0.118266	13.9258	61.4143	IRS1;IGF1
79	Proteins Involved in Polycystic Kidney Disease	5/97	0.0126203	0.121251	3.80881	16.6538	POSTN;IGF1;AGT;BICC1;SYTL2
80	Thyroid Stimulating Hormone (TSH) Secretion in Overt Hypothyroidism	3/35	0.013386	0.12577	6.54355	28.2259	THRB;CCK;ADRA1B
81	Androgens in Sebocyte Maturation	4/65	0.0138495	0.12577	4.58643	19.6277	IRS1;KRT15;IGF1;GLI1
82	Cardiomyocyte Hypertrophy	4/65	0.0138495	0.12577	4.58643	19.6277	IRS1;IGF1;MMP9;AGT
83	Dopamine Mediated Glutamate Release/Uptake Circle in Neuron in Migraine	2/13	0.0142297	0.12577	12.6592	53.8322	SNAP25;SLC17A7
84	Retinoic Acid Role in Endometriosis	2/13	0.0142297	0.12577	12.6592	53.8322	RBP1;CYP1B1
85	Chemokines Signaling in Atherosclerosis	2/13	0.0142297	0.12577	12.6592	53.8322	CXCL1;CX3CL1
86	Norepinephrine Release Regulation	3/36	0.0144519	0.12577	6.34494	26.883	UNC13B;SNAP25;ADRB2
87	Tumor Infiltrating Macrophages in Cancer Progression and Immune Escape	3/36	0.0144519	0.12577	6.34494	26.883	SPP1;MMP9;CX3CL1
88	Toll-like Receptor Independent Sterile Inflammation	4/66	0.014582	0.12577	4.51223	19.0775	IL1RL1;IL33;TXNIP;CXCL1
89	TERT Activation in Cancer	3/37	0.0155646	0.132226	6.15801	25.6343	MYCN;GLI1;KLF4
90	Mast-Cell Activation without Degranulation through IL33/IL1RL1 Signaling	2/14	0.0164467	0.132226	11.6037	47.6635	IL33;IL1RL1
91	Genes with Mutations Associated with Atopic Dermatitis	2/14	0.0164467	0.132226	11.6037	47.6635	IL1RL1;ADRB2
92	Glutamate, D-Serine, and ATP Release from Astrocytes	2/14	0.0164467	0.132226	11.6037	47.6635	SNAP25;SLC17A7
93	Parathyroid Glands Development (Mouse Model)	2/14	0.0164467	0.132226	11.6037	47.6635	EYA1;GLI1
94	Medulloblastoma	5/104	0.0166323	0.132226	3.53824	14.4941	MYCN;NOTCH1;IGF1;GLI1;NGF
95	VEGFA/NOTCH1/WNT Cross-talk in Blood Vessel Sprouting and Branching in Cancer	3/38	0.0167243	0.132226	5.98176	24.4708	FOXC1;NOTCH1;WNT2
96	Hematopoietic Cell Lineage: B-cell	3/38	0.0167243	0.132226	5.98176	24.4708	NOTCH1;AHR;CD34
97	Proteins with Altered Expression in Osteoarthritis	2/15	0.0188004	0.144137	10.7105	42.5623	SPP1;COL10A1
98	Longevity Related Drugs	2/15	0.0188004	0.144137	10.7105	42.5623	AHR;KNG1
99	EphrinR -> STAT Signaling	2/15	0.0188004	0.144137	10.7105	42.5623	EFNB2;NOTCH1
100	Proteins with Altered Expression in Endometriosis	3/41	0.0204865	0.148225	5.50868	21.4177	ANGPT1;RBP1;MMP9
101	Steroidogenesis Impairement in Polycystic Ovary Syndrome	3/41	0.0204865	0.148225	5.50868	21.4177	IRS1;FST;IGF1
102	IL17 Signaling in Psoriasis	3/41	0.0204865	0.148225	5.50868	21.4177	CXCL1;MMP9;CXCL5
103	Mesangial Cell Dysfunction in Glomerulonephritis	3/41	0.0204865	0.148225	5.50868	21.4177	MAPKAPK3;MMP9;AGT
104	Insulin Influence on Lipogenesis	2/16	0.0212866	0.148225	9.94498	38.285	IRS1;LPL
105	Exocytosis: Vesicle Fusion	2/16	0.0212866	0.148225	9.94498	38.285	UNC13B;SNAP25
106	Androgen Induced Sebocyte Hyperfunction	2/16	0.0212866	0.148225	9.94498	38.285	IRS1;IGF1
107	Hedgehog Family -> ARRB1/ARRB2 Canonical Signaling	2/16	0.0212866	0.148225	9.94498	38.285	ARRB1;GLI1
108	NKX2-1 in Thyroid Dysgenesis (Hypothesis)	2/16	0.0212866	0.148225	9.94498	38.285	DIO2;AGT
109	Penile Detumescense Augmentation Mechanisms	2/16	0.0212866	0.148225	9.94498	38.285	PTGFR;ADRA1B
110	Acute Phase in Atopic Dermatitis	3/42	0.0218353	0.150664	5.36716	20.5252	IL1RL1;IL33;MAF
111	WNT in Epithelial to Mesenchymal Transition in Cancer	3/43	0.0232316	0.15505	5.23271	19.6867	FOXC1;TNC;MMP9
112	Ependymoma	3/43	0.0232316	0.15505	5.23271	19.6867	EFNB2;NOTCH1;GLI1
113	ADRA1 -> Ion Channels	2/17	0.023901	0.15505	9.28151	34.6556	ADRA1B;TGM2
114	Find me Signal: Apoptotic Cell Attracts Phagocyte	2/17	0.023901	0.15505	9.28151	34.6556	THBS1;CX3CL1
115	NTRK1/2/3 -> Acetylcholine Production	2/17	0.023901	0.15505	9.28151	34.6556	IRS1;NGF
116	IL33 Signaling Related Eosinophilia in Asthma	2/17	0.023901	0.15505	9.28151	34.6556	IL33;IL1RL1
117	PGF2-alpha Effect on Treatment	2/17	0.023901	0.15505	9.28151	34.6556	PTGFR;MMP9
118	Proteins Involved in Diabetes Mellitus Type 2	5/115	0.0245084	0.156071	3.18263	11.8035	IRS1;TXNIP;CCK;IGF1;AGT
119	Norepinephrine Neuronal Release	3/44	0.0246752	0.156071	5.10483	18.8978	UNC13B;SNAP25;ADRA1B
120	Adiponectin Synthesis Declines in Insulin Resistance	3/44	0.0246752	0.156071	5.10483	18.8978	IRS1;PKIA;IGF1
121	Myeloid Progenitor Cell -> GEMM - CFU Surface Expression Markers	2/18	0.0266394	0.165732	8.70097	31.5442	NOTCH1;CD34
122	TGFBR -> CREB/ELK-SRF Signaling	2/18	0.0266394	0.165732	8.70097	31.5442	TGFB2;MAPKAPK3
123	ERK/MAPK Canonical Signaling	3/47	0.0292901	0.165812	4.75604	16.7912	DUSP1;SPHK1;RAPGEF3
124	IL6/IGF1/VEGFA Signaling in Multiple Myeloma	3/47	0.0292901	0.165812	4.75604	16.7912	IRS1;IGF1;MMP9
125	AHR in Intestinal Cell Antimicrobial Barrier Maintenance	2/19	0.0294978	0.165812	8.18873	28.8525	NOTCH1;AHR
126	ANGPT/TEK Stimulates Endothelial Cell Migration in Cancer	2/19	0.0294978	0.165812	8.18873	28.8525	ANGPT1;IGF1
127	FBLN5 Potentiates Migration and Proliferation of Endothelial Cells in Cancer	2/19	0.0294978	0.165812	8.18873	28.8525	LOXL4;THBS1
128	Hedgehog Signaling Activation by Blocking of Tumor Suppressors	2/19	0.0294978	0.165812	8.18873	28.8525	MYCN;GLI1
129	Hedgehog Signaling Activation in Cancer	2/19	0.0294978	0.165812	8.18873	28.8525	MYCN;GLI1
130	Proteins with Altered Expression in Cancer-Associated Enabling of Replicative Immortality	2/19	0.0294978	0.165812	8.18873	28.8525	MYCN;GLI1
131	Axonal Transport Impairment in Hungtington Disease	2/19	0.0294978	0.165812	8.18873	28.8525	SNAP25;KALRN
132	Cataract, Congenital	2/19	0.0294978	0.165812	8.18873	28.8525	MAF;CRYAB
133	Corneodesmosomes in Atopic Dermatitis	2/19	0.0294978	0.165812	8.18873	28.8525	CDSN;PKP2
134	Glutamate Overdose and Aura Effect in Familial Hemiplegic Migraine Type 3	2/19	0.0294978	0.165812	8.18873	28.8525	SNAP25;SLC17A7
135	Glutamate Overdose and Aura Effect in Migraine Type 2	2/19	0.0294978	0.165812	8.18873	28.8525	SNAP25;SLC17A7
136	Osteoarthritis	4/82	0.0297107	0.165812	3.58372	12.6013	TGFB2;SPP1;COL10A1;GLI1
137	mTOR Signaling Activation by Amino Acids	3/48	0.0309227	0.170075	4.65012	16.165	IRS1;SH3BP4;IGF1
138	Vascular Smooth Muscle Cell/Pericyte Migration and Proliferation	3/48	0.0309227	0.170075	4.65012	16.165	IRS1;SPP1;IGF1
139	Prostate Cancer	5/123	0.0315287	0.17216	2.96565	10.2518	TGFB2;IRS1;IGF1;GRPR;MMP9
140	Proteins with Altered Expression in Polycystic Ovary Syndrome	2/20	0.0324723	0.173042	7.73341	26.5053	FST;IGF1
141	Exocytosis: Vesicle Priming	2/20	0.0324723	0.173042	7.73341	26.5053	UNC13B;SNAP25
142	Dopamine Mediated Glutamate Release and Glutamate Uptake Circle	2/20	0.0324723	0.173042	7.73341	26.5053	SNAP25;SLC17A7
143	Mesangial Cell Dysfunction in Diabetic Nephropathy	3/49	0.0326022	0.173042	4.5488	15.5722	MAPKAPK3;MMP9;AGT
144	Vascular Motility	4/85	0.0332906	0.175469	3.45046	11.7401	PTGFR;PTGIR;ADRB2;ADRA1B
145	Sonic Hedgehog Signaling in Neuroblastoma	2/21	0.035559	0.17909	7.32602	24.4437	MYCN;GLI1
146	BMP Signaling Impairment in Granulosa Cell in POF	2/21	0.035559	0.17909	7.32602	24.4437	HAS2;PTX3
147	IGF1R -> ELK/SRF/HIF1A/MYC/SREBF Signaling	2/21	0.035559	0.17909	7.32602	24.4437	IRS1;IGF1
148	Conventional Dendritic Cell Role in Diabetes Mellitus Type 1	2/21	0.035559	0.17909	7.32602	24.4437	IL33;TXNIP
149	Genes with Mutations Associated with Cataract	2/21	0.035559	0.17909	7.32602	24.4437	MAF;CRYAB
150	Glutamate Overdose and Aura Effect in Migraine Type 1	2/21	0.035559	0.17909	7.32602	24.4437	SNAP25;SLC17A7
151	Synovial Fibroblast Activation by Citokines in Rheumatoid Arthritis	3/51	0.0361011	0.17909	4.35882	14.4775	IL11;ANGPT1;IL16
152	NTRK -> AP-1/CREB/ELK/SRF/MYC/SMAD3/TP53 Signaling	3/51	0.0361011	0.17909	4.35882	14.4775	MAPKAPK3;IRS1;NGF
153	Myocardial Remodeling	3/51	0.0361011	0.17909	4.35882	14.4775	ARRB1;MMP9;AGT
154	Polycystic Ovary Syndrome	3/52	0.0379201	0.186167	4.26965	13.9715	IRS1;FST;IGF1
155	Hypertrophic Cardiomyopathy	4/89	0.038439	0.186167	3.28742	10.7127	IRS1;IGF1;MMP9;AGT
156	Proteins Involved in Hepatocellular Carcinoma	5/130	0.0386086	0.186167	2.79857	9.10734	IRS1;CPE;IGF1;MMP9;AGT
157	Cyclosporine Induced Nephrotoxicity	2/22	0.0387541	0.186167	6.95936	22.6215	SPP1;AGT
158	Low-Density Lipoproteins and Chemokines in Atherosclerosis	2/22	0.0387541	0.186167	6.95936	22.6215	LPL;CX3CL1
159	Adipokines and Cytokines in Insulin Resistance in Skeletal Muscles	3/53	0.0397852	0.189918	4.18404	13.4904	IRS1;LPL;CXCL5
160	Catecholamines Secretion from Adrenal Gland	3/54	0.0416959	0.192283	4.10179	13.0328	UNC13B;SNAP25;AGT
161	Airway Smooth Muscle Cell High Rate Proliferation	3/54	0.0416959	0.192283	4.10179	13.0328	IL11;IRS1;IGF1
162	AHR Signaling in M1 Macrophages Function	2/23	0.042054	0.192283	6.62763	21.0016	MAF;AHR
163	Telogen Maintenance in Androgenic Alopecia	2/23	0.042054	0.192283	6.62763	21.0016	NOTCH1;CD34
164	Hypoxia-Induced Cell Death Evasion in Cancer	2/23	0.042054	0.192283	6.62763	21.0016	IRS1;IGF1
165	Age-Related Cataract	2/23	0.042054	0.192283	6.62763	21.0016	CRYAB;TGM2
166	Angiotensin-Aldosterone System Activation Scheme	2/23	0.042054	0.192283	6.62763	21.0016	AGT;NR3C2
167	Proteins Involved in Astrocytoma	4/92	0.0425828	0.193535	3.17486	10.0208	THRB;TNC;GLI1;KNG1
168	Proteins Involved in Breast Cancer Related to IGF1R/Akt Signaling Pathway	3/55	0.0436521	0.197214	4.02271	12.5971	IRS1;IGF1;MMP9
169	Androgen Deficiency in Male Obesity	2/24	0.0454549	0.199533	6.32605	19.554	LPL;ADRB2
170	Synaptic Exocytosis in Dementia	2/24	0.0454549	0.199533	6.32605	19.554	UNC13B;SNAP25
171	beta-Cell Granules Exocytois	2/24	0.0454549	0.199533	6.32605	19.554	SNAP25;RAPGEF3
172	Lactate as a Signaling Molecule in Cancer Cells	2/24	0.0454549	0.199533	6.32605	19.554	TGFB2;THBS1
173	Proteins Involved in Pancreatic Cancer	4/94	0.04548	0.199533	3.10399	9.59284	NOTCH1;IGF1;KLF4;MMP9
174	Proteins Involved in Rheumatoid Arthritis	4/96	0.0484846	0.204152	3.03621	9.1891	IL33;SPP1;MMP9;CX3CL1
175	ADRA2C/ADRB2 -> Vasoconstriction	2/25	0.0489535	0.204152	6.0507	18.2543	ARRB1;ADRB2
176	Eat me Signal: Apoptotic Cell Initiates Phagocytosis	2/25	0.0489535	0.204152	6.0507	18.2543	THBS1;TGM2
177	Lipids Enhance Apoptotic Cell Engulfment and Reduce Inflammation	2/25	0.0489535	0.204152	6.0507	18.2543	THBS1;TGM2
178	Lipogenesis Regulation in Adipocyte	2/25	0.0489535	0.204152	6.0507	18.2543	IRS1;LPL
179	Axonal Transport	2/25	0.0489535	0.204152	6.0507	18.2543	SNAP25;KALRN
180	AGTR1 -> ARRB1/ARRB2 Signaling	2/25	0.0489535	0.204152	6.0507	18.2543	ARRB1;AGT
181	ER Stress in Macular Degeneration	2/25	0.0489535	0.204152	6.0507	18.2543	CASP12;CASP4
182	Familial Mediterranean Fever	2/25	0.0489535	0.204152	6.0507	18.2543	IL33;TXNIP

## Sheet: Table B. MSigDB
#	Term	Overlap	P-value	Adjusted P-value	Odds Ratio	Combined Score	Genes
1	Epithelial Mesenchymal Transition	21/200	1.14523e-12	4.80997e-11	8.68156	238.703	POSTN;SERPINE2;GADD45A;LUM;COL11A1;COL12A1;TNC;CXCL1;THBS1;DCN;SFRP1;DAB2;ANPEP;GPC1;COL5A3;DPYSL3;SPP1;PTX3;SLIT2;TGM2;CTHRC1
2	KRAS Signaling Up	15/200	1.94338e-07	4.08111e-06	5.86486	90.6337	IL33;SNAP25;TMEM176B;TMEM176A;ANXA10;BPGM;NGF;KLF4;MMP9;MYCN;SPP1;SCG5;SPARCL1;ITGBL1;CPE
3	Myogenesis	11/200	0.000145983	0.00204377	4.14757	36.6314	ABLIM1;NOTCH1;PPP1R3C;PKIA;SPHK1;FST;FXYD1;FHL1;IGF1;TPD52L1;CRYAB
4	Notch Signaling	4/32	0.00106014	0.00916568	10.0086	68.5528	FZD1;NOTCH1;ARRB1;WNT2
5	UV Response Dn	8/144	0.00109115	0.00916568	4.15778	28.3582	PTGFR;DAB2;GRK5;IRS1;DUSP1;COL11A1;HAS2;KALRN
6	Angiogenesis	4/36	0.0016608	0.0116256	8.75578	56.041	POSTN;LUM;SPP1;LPL
7	TNF-alpha Signaling via NF-kB	9/200	0.00235875	0.0123835	3.33326	20.1649	DUSP4;GADD45A;DUSP1;SPHK1;TNC;CXCL1;PTX3;KLF4;FJX1
8	Inflammatory Response	9/200	0.00235875	0.0123835	3.33326	20.1649	PTGIR;IL18RAP;SPHK1;HAS2;AHR;VIP;SLC4A4;CX3CL1;SLC7A2
9	Estrogen Response Early	8/200	0.00811539	0.030986	2.93667	14.1371	FOXC1;ABLIM1;CISH;KRT15;TPD52L1;KLF4;SLC7A2;TGM2
10	Apical Junction	8/200	0.00811539	0.030986	2.93667	14.1371	CDSN;IRS1;AMIGO2;SLIT2;ADRA1B;CD34;MMP9;CX3CL1
11	p53 Pathway	8/200	0.00811539	0.030986	2.93667	14.1371	NOTCH1;MAPKAPK3;GADD45A;SPHK1;KIF13B;TXNIP;KLF4;TPD52L1
12	Hypoxia	7/200	0.0248727	0.0746182	2.54695	9.40839	LXN;PPP1R3C;DUSP1;GPC1;PAM;DCN;TGM2
13	Estrogen Response Late	7/200	0.0248727	0.0746182	2.54695	9.40839	UNC13B;FOXC1;CISH;GJB3;CPE;TPD52L1;KLF4
14	Xenobiotic Metabolism	7/200	0.0248727	0.0746182	2.54695	9.40839	ALDH3A1;TGFB2;VNN1;TMEM176B;PDK4;AOX1;IGF1
15	Apoptosis	6/161	0.0280637	0.0785783	2.71384	9.69731	TGFB2;GADD45A;LUM;CASP4;TXNIP;DCN

## Sheet: Table B. JL Disease
#	Term	Overlap	P-value	Adjusted P-value	Odds Ratio	Combined Score	Genes
1	Hypertension	17/289	9.4621e-07	0.000404978	4.53428	62.8941	PTGIR;RAMP3;NOTCH1;ANGPT1;IRS1;LPL;IGF1;ADRB2;MMP9;AGT;KNG1;NR3C2;CTGF;SPP1;AGTR2;VIP;CD34
2	Coronary artery disease	12/205	4.01771e-05	0.0085979	4.44617	45.005	PTGIR;ANGPT1;SPP1;LPL;PHACTR1;IGF1;ADRB2;CD34;MMP9;CX3CL1;AGT;KNG1
3	Skin cancer	18/454	9.82051e-05	0.0140106	2.98098	27.5098	KCNH5;NOTCH1;ANGPT1;COL11A1;TNC;ANK3;KALRN;CPED1;FAM135B;COL5A3;DMXL2;NLRP2;ITGBL1;AOX1;SLC16A9;SLIT2;PHLDB2;ADAMTS6
4	Skin disease	5/41	0.000279339	0.0298492	9.76141	79.8784	GJB4;GJB3;IGF1;CD34;MMP9
5	Arthritis	10/186	0.000348705	0.0298492	4.03698	32.1396	IL11;IL33;DUSP1;SPP1;CXCL1;VIP;MMP9;KNG1;CXCL5;CTGF
6	Fibroma	3/13	0.000736619	0.0525455	20.9628	151.214	COL12A1;TNC;CD34
7	Kidney cancer	55/2584	0.00140234	0.0857429	1.62503	10.6758	SEMA5A;DOCK4;SERPINE2;IRS1;COL12A1;TNC;GLI1;SLC4A4;NR3C2;IL18RAP;TNN;ANPEP;CAPN5;RSPO2;KIF13B;ENPP2;AOX1;SOX5;TGM2;UNC13B;TLE4;RNF43;POSTN;KCNH5;KCNAB1;ANK3;MMP9;DKK2;CPED1;PKP2;ROR1;PHLDB2;PTGFR;NOTCH1;ITIH2;COL11A1;LTBP2;PLD1;KALRN;THBS1;MYH14;LRRC8D;HIVEP3;SLIT2;COL28A1;LUM;SULF1;MYO1D;FAM135B;DAB2;COL5A3;DMXL2;PDE3A;CPE;PAM
8	Spiradenoma	2/5	0.00196689	0.0967915	46.4358	289.355	KRT15;DKK2
9	Diabetic retinopathy	4/38	0.00203533	0.0967915	8.2399	51.0634	TGFB2;ANGPT1;IGF1;CTGF
10	Alstrom syndrome	2/6	0.00292261	0.108424	34.8251	203.214	RTL1;SLC4A4
11	Carcinoma	184/11318	0.00351334	0.108424	1.40405	7.93456	SEMA5A;RTL1;SERPINE2;IRS1;COL12A1;TNC;LOXL4;AHR;GRPR;SLC4A4;ZDHHC2;IFIT3;HID1;NR3C2;CTGF;FAM107B;ALCAM;IL18RAP;TNN;ANPEP;DPYSL3;CAPN5;C1RL;PDK4;ENPP2;CYP1B1;PDE8B;SOX5;TGM2;PAQR8;UNC13B;TLE4;RNF43;POSTN;KCNH5;KCNK10;SCARA5;FST;OMD;ACOT11;ANXA10;ANK3;DKK2;SYTL2;CPED1;SFRP1;SFRP2;MYCN;PPP1R3C;MAPKAPK3;SDPR;PKP2;TXNIP;SPARCL1;SLC27A6;FAR1;ROR1;AGTR2;PHLDB2;ABCG2;OSBP2;PTGFR;NOTCH1;IL20RA;CHRD;GPR85;…
12	Rhinitis	3/22	0.0036078	0.108424	11.028	62.0287	NGF;VIP;KNG1
13	Alpha thalassemia	2/7	0.00405324	0.108424	27.8587	153.452	DNMT3L;SMARCA1
14	Xanthinuria	2/7	0.00405324	0.108424	27.8587	153.452	MOCOS;AOX1
15	cartilage-hair hypoplasia	2/7	0.00405324	0.108424	27.8587	153.452	RTL1;COL10A1
16	MEDNIK syndrome	2/7	0.00405324	0.108424	27.8587	153.452	GJB4;GJB3
17	Cerebrovascular disease	9/225	0.00512113	0.128932	2.94369	15.5261	NOTCH1;ANGPT1;AGTR2;IGF1;NGF;CD34;MMP9;AGT;KNG1
18	Irritable bowel syndrome	4/50	0.00555822	0.132162	6.08665	31.6048	P2RX3;CCK;VIP;TGM2
19	Melanoma	15/505	0.00614902	0.132656	2.17971	11.0979	KCNH5;ANGPT1;COL11A1;TNC;ANK3;KALRN;CPED1;COL5A3;NLRP2;ITGBL1;AOX1;SLC16A9;SLIT2;PHLDB2;ADAMTS6
20	Heart conduction disease	5/82	0.00634043	0.132656	4.55427	23.0483	SFRP2;PDE3A;SLC4A4;ADAMTS6;SULF2
21	Clouston syndrome	2/9	0.00681876	0.132656	19.897	99.2479	GJB4;GJB3
22	Interstitial cystitis	2/9	0.00681876	0.132656	19.897	99.2479	P2RX3;ZDHHC2
23	Bipolar disorder	6/124	0.00874828	0.162794	3.57153	16.9251	TLE4;DDR1;ABLIM1;FAM110C;FOXO6;ANK3
24	Schizophrenia	6/126	0.00942612	0.168099	3.51165	16.3793	CACNA1I;ARHGAP31;GPC1;ANK3;ADAMTS6;NRGN
25	Transient neonatal diabetes mellitus	2/11	0.0102236	0.175029	15.4739	70.9177	DNMT3L;NLRP2
26	Degenerative disc disease	3/33	0.0113934	0.187553	6.9805	31.2358	GDF5;DCN;ASPN
27	Spondylolisthesis	2/12	0.0121538	0.192661	13.9258	61.4143	CDSN;AMIGO2
28	Oculodentodigital dysplasia	2/13	0.0142297	0.207035	12.6592	53.8322	GJB4;GJB3
29	Weill-Marchesani syndrome	2/13	0.0142297	0.207035	12.6592	53.8322	LTBP2;ADAMTS6
30	Pain agnosia	5/101	0.0148218	0.207035	3.64937	15.3699	P2RX3;RGS20;CCK;NGF;KNG1
31	Obesity	5/103	0.0160133	0.207035	3.57453	14.7783	SFRP2;DIRAS2;ENPP2;ST3GAL1;CAMK1G
32	Sensorineural hearing loss	5/103	0.0160133	0.207035	3.57453	14.7783	NOTCH1;GJB4;GJB3;COL11A1;MYH14
33	Proliferative vitreoretinopathy	2/14	0.0164467	0.207035	11.6037	47.6635	TGFB2;CTGF
34	Cryoglobulinemia	2/14	0.0164467	0.207035	11.6037	47.6635	CDSN;DUSP1
35	Adams-Oliver syndrome	2/15	0.0188004	0.22906	10.7105	42.5623	ARHGAP31;NOTCH1
36	Hyperglycemia	5/108	0.0192667	0.22906	3.40014	13.4284	IRS1;TXNIP;LPL;CCK;IGF1
37	Oppositional defiant disorder	2/16	0.0212866	0.2384	9.94498	38.285	LXN;OSBP2
38	Hyperprolactinemia	2/16	0.0212866	0.2384	9.94498	38.285	IGF1;VIP
39	Common cold	3/42	0.0218353	0.2384	5.36716	20.5252	IL33;POSTN;MMP9
40	Myopia	4/75	0.0222838	0.2384	3.93845	14.9814	TGFB2;LUM;COL11A1;DCN
41	Acquired metabolic disease	10/338	0.0236481	0.2384	2.14933	8.04813	UNC13B;DOCK4;KCNH5;LPL;CCK;IGF1;SULF1;GDF5;NR3C2;LHX8
42	Coffin-Siris syndrome	2/17	0.023901	0.2384	9.28151	34.6556	CPED1;ADAMTS6
43	Brain disease	4/77	0.0242748	0.2384	3.83016	14.2417	SNAP25;NOTCH1;IGF1;NGF
44	Ulcerative colitis	5/115	0.0245084	0.2384	3.18263	11.8035	DDR1;RSPO2;SH3BP4;SORCS2;CAMK1G
45	Vascular disease	4/78	0.0253094	0.24072	3.77821	13.8909	TNC;LPL;KALRN;KNG1
46	Oligohydramnios	2/19	0.0294978	0.274458	8.18873	28.8525	SRPX2;AGT
47	Gestational trophoblastic neoplasm	2/20	0.0324723	0.290318	7.73341	26.5053	NLRP2;PAM
48	Brain edema	2/21	0.035559	0.290318	7.32602	24.4437	MMP9;KNG1
49	Ureteral disease	2/22	0.0387541	0.290318	6.95936	22.6215	SPP1;CTGF
50	Hodgkin's lymphoma, nodular sclerosis	2/22	0.0387541	0.290318	6.95936	22.6215	GJB3;MYH14
51	Hyperinsulinism	3/54	0.0416959	0.290318	4.10179	13.0328	IRS1;LPL;IGF1
52	Ankylosis	2/23	0.042054	0.290318	6.62763	21.0016	SPP1;GDF5
53	Aniridia	2/24	0.0454549	0.290318	6.32605	19.554	FOXC1;CYP1B1
54	Corneal disease	2/24	0.0454549	0.290318	6.32605	19.554	ADAMTS6;NR3C2
55	Gastroesophageal reflux disease	2/24	0.0454549	0.290318	6.32605	19.554	CCK;PAM
56	Goiter	2/24	0.0454549	0.290318	6.32605	19.554	THRB;IGF1
57	Heart disease	4/94	0.04548	0.290318	3.10399	9.59284	PKIA;SLIT2;CD34;DCN
58	Pancreatic cancer	5/137	0.0465865	0.290318	2.64922	8.12367	MYO1D;RNF43;DAB2;SLIT2;SOX5
59	Liver cancer	14/597	0.0477739	0.290318	1.69532	5.15592	DOCK4;KCNH5;NOTCH1;COL11A1;COL12A1;ITGA1;ANK3;SULF1;KALRN;SYTL2;CACNA1I;DMXL2;HIVEP3;PAM
60	Hyperaldosteronism	2/25	0.0489535	0.290318	6.0507	18.2543	AGT;NR3C2

## Sheet: Table B. JL Tissue
#	Term	Overlap	P-value	Adjusted P-value	Odds Ratio	Combined Score	Genes
1	Mesenchyme	22/264	3.3579e-11	2.13227e-08	6.73108	162.334	FOXC1;POSTN;TGFB2;EYA1;MCAM;CRABP1;TNC;IGF1;FOXL1;GLI1;GDF5;MMP9;DCN;CTGF;ALCAM;ANPEP;SPP1;COL10A1;HAS2;CD34;SOX5;LHX8
2	Mesenchymal stem cell	17/159	1.28112e-10	4.06755e-08	8.74346	199.159	NOTCH1;ANGPT1;MCAM;ITGA1;TNC;LPL;IGF1;NGF;KLF4;GDF5;MMP9;DCN;ALCAM;ANPEP;SPP1;COL10A1;CD34
3	Adult	38/918	3.5808e-09	7.57936e-07	3.29283	64.0379	SNAP25;NOTCH1;IRS1;FHL1;TNC;LPL;PTN;ADRB2;GLI1;KNG1;NR3C2;CTGF;NRGN;EFNB2;ALCAM;ANPEP;SPP1;SLC17A7;CD34;TGM2;POSTN;TGFB2;ANGPT1;MCAM;FST;CCK;IGF1;NGF;KLF4;GDF5;MMP9;AGT;DCN;MYCN;RBP1;AGTR2;VIP;ABCG2
4	Stromal cell	16/182	8.01475e-09	1.27234e-06	7.00461	130.58	IL11;POSTN;TGFB2;NOTCH1;ANGPT1;MCAM;TNC;CXCL1;IGF1;NGF;MMP9;DCN;ALCAM;ANPEP;SPP1;CD34
5	Vasculature	12/121	1.63697e-07	2.07895e-05	7.90644	123.54	EFNB2;PTGIR;NOTCH1;ANPEP;MCAM;AGTR2;IGF1;VIP;CD34;MMP9;THBS1;KNG1
6	Periodontal ligament	8/49	4.18832e-07	4.43264e-05	13.8586	203.524	POSTN;ALCAM;NOTCH1;MCAM;SPP1;GDF5;DCN;ASPN
7	Plasma cell	17/286	8.19068e-07	6.87002e-05	4.58556	64.267	POSTN;ITIH2;LUM;HEG1;ITGA1;TNC;PTN;SEPP1;THBS1;AGT;KNG1;ALCAM;VNN1;TNN;ANPEP;C1RL;SPARCL1
8	Cranium	12/141	8.65514e-07	6.87002e-05	6.67382	93.1662	TGFB2;NOTCH1;OMD;OGN;TNC;SPP1;IGF1;NGF;GDF5;CD34;MMP9;KNG1
9	Keloid	6/29	2.86402e-06	0.000202072	18.4123	235.002	POSTN;TGFB2;TNC;CD34;DCN;CTGF
10	Neural crest	11/138	4.70887e-06	0.000299013	6.19197	75.951	FOXC1;MYCN;NOTCH1;EYA1;RBP1;CRABP1;TNC;CHRD;GLI1;NGF;SOX5
11	Immune system	34/1046	6.47168e-06	0.000373592	2.50343	29.9112	NOTCH1;TNC;LPL;GSTT1;CXCL1;ADRB2;MSLN;THBS1;STX11;KNG1;CXCL5;CTGF;IL1RL1;ALCAM;ANPEP;SPP1;CYP1B1;CD34;TGM2;IL11;IL33;TGFB2;CDSN;CISH;GADD45A;DUSP1;SPHK1;IL16;IGF1;NGF;MMP9;MAF;MYCN;VIP
12	Myofibroblast	8/74	1.0289e-05	0.000544458	8.59818	98.7453	POSTN;TGFB2;TNC;SPP1;CD34;MMP9;DCN;CTGF
13	Ear	12/186	1.53485e-05	0.000749716	4.93647	54.7182	POSTN;DAB2;FOXC1;COL11A1;OGN;SPP1;CYP1B1;CPE;NREP;IGF1;PTN;CTGF
14	Fiber	14/263	2.66972e-05	0.00121091	4.03865	42.5308	NOTCH1;LUM;TNC;CCK;IGF1;NGF;MMP9;KNG1;DCN;P2RX3;SPP1;SLC17A7;VIP;CD34
15	Tendon	9/111	3.0333e-05	0.0012841	6.27014	65.23	NOTCH1;LUM;TNC;IGF1;GDF5;CD34;MMP9;DCN;CTGF
16	Sympathetic nervous system	4/14	3.61091e-05	0.00143308	28.0498	286.921	MYCN;ADRB2;ADRA1B;NGF
17	Perichondrium	5/28	4.26143e-05	0.00159177	15.2888	153.856	TNC;COL10A1;IGF1;GDF5;SOX5
18	Alveolar bone	7/70	6.17132e-05	0.0021771	7.85452	76.1339	POSTN;NOTCH1;TNC;SPP1;FAM20A;MMP9;LHX8
19	Blood vessel endothelium	9/124	7.25242e-05	0.00242383	5.55766	52.9733	PTGIR;NOTCH1;SPP1;AGTR2;IGF1;MMP9;KNG1;DCN;ABCG2
20	Ectoderm	9/136	0.000147502	0.00438924	5.02944	44.3681	FZD1;NOTCH1;EYA1;FST;CRABP1;TNC;CHRD;GLI1;NGF
21	Pulp	5/36	0.000148928	0.00438924	11.3387	99.9172	P2RX3;MCAM;OMD;SPP1;KNG1
22	Leiomyosarcoma cell line	3/8	0.000152068	0.00438924	41.9362	368.668	ADRB2;ADRA1B;KNG1
23	Neointima	6/58	0.000172651	0.00475955	8.13193	70.457	TNC;SPP1;AGTR2;KLF4;CD34;MMP9
24	Knee	8/110	0.000179889	0.00475955	5.55334	47.8874	NOTCH1;COL10A1;IGF1;GDF5;MMP9;KNG1;DCN;ASPN
25	Mesoderm	7/86	0.000227945	0.00578979	6.25863	52.4874	EFNB2;FZD1;SFRP2;NOTCH1;FST;CHRD;WNT2
26	Femur	6/63	0.000273106	0.0066701	7.41671	60.859	NOTCH1;AMIGO2;SPP1;IGF1;ZDHHC2;CD34
27	Dental pulp	5/42	0.000313429	0.00737138	9.4971	76.6221	ALCAM;MCAM;OMD;TNC;SPP1
28	Artery	14/336	0.000353827	0.0080243	3.11134	24.7249	PTGIR;NOTCH1;IRS1;IGF1;ADRB2;MMP9;AGT;KNG1;DCN;NR3C2;CASP12;SPP1;AGTR2;VIP
29	Bone matrix	5/44	0.000390964	0.00856075	9.00916	70.6939	OGN;SPP1;IGF1;MMP9;DCN
30	Tibia	6/71	0.000523537	0.0110815	6.50124	49.1162	NOTCH1;SPP1;PTN;IGF1;ZDHHC2;GDF5
31	Dentin	6/72	0.000564402	0.0115611	6.40241	47.8884	SDPR;MCAM;OMD;SPP1;MMP9;DCN
32	Cementum	4/28	0.000631219	0.0125258	11.6791	86.0501	POSTN;NOTCH1;SPP1;GDF5
33	SK-N-SH cell	3/13	0.000736619	0.0141743	20.9628	151.214	MYCN;NGF;GRPR
34	Aorta endothelium	4/30	0.00082618	0.0154301	10.7796	76.5214	NOTCH1;MCAM;THBS1;PHLDB2
35	Cancer stem cell	6/78	0.000864224	0.0156795	5.86708	41.3845	ALCAM;NOTCH1;GLI1;KLF4;CD34;ABCG2
36	Molaris	5/53	0.000930854	0.0164192	7.31659	51.0655	SDPR;MCAM;SPP1;FAM20A;PTN
37	HUVEC cell	7/113	0.00118354	0.0199352	4.65804	31.3917	ANGPT1;MCAM;CD34;MMP9;THBS1;KNG1;CX3CL1
38	Epiphyseal growth plate	4/33	0.00119297	0.0199352	9.66303	65.0448	COL10A1;IGF1;GDF5;SOX5
39	Tooth enamel	5/62	0.00189192	0.0294426	6.15852	38.6149	NOTCH1;SDPR;SPP1;FAM20A;SLC4A4
40	i10	2/5	0.00196689	0.0294426	46.4358	289.355	TNN;ASPN
41	pa317	2/5	0.00196689	0.0294426	46.4358	289.355	CD34;ABCG2
42	MSTO-211H cell	2/5	0.00196689	0.0294426	46.4358	289.355	DIO2;ROR1
43	GH4-C1 cell	3/18	0.00199375	0.0294426	13.9716	86.8719	SCG5;CPE;VIP
44	Satellite cell	4/39	0.00224284	0.0323683	8.00407	48.8249	NOTCH1;GPC1;FST;IGF1
45	NG-108-15 cell	3/19	0.0023428	0.0330595	13.0977	79.3253	CACNA1I;AGTR2;KNG1
46	Granulation tissue	3/20	0.0027274	0.03765	12.3267	72.7816	TNC;MMP9;CTGF
47	Cornea	2/6	0.00292261	0.0378746	34.8251	203.214	LUM;COL12A1
48	Placental membrane	2/6	0.00292261	0.0378746	34.8251	203.214	IGF1;ABCG2
49	CH-1 cell	2/6	0.00292261	0.0378746	34.8251	203.214	WISP2;SOX5
50	Osteocyte	4/43	0.00321882	0.0400774	7.18168	41.2138	ALCAM;SPP1;IGF1;CD34
51	Vascular cell	4/43	0.00321882	0.0400774	7.18168	41.2138	MCAM;THBS1;CD34;MMP9
52	Cerebrospinal fluid	4/44	0.0035016	0.0427599	7.00178	39.5918	OGN;SPARCL1;CX3CL1;KNG1
53	Adductor	2/7	0.00405324	0.0474017	27.8587	153.452	AMIGO2;PDE8B
54	Pyloric region	2/7	0.00405324	0.0474017	27.8587	153.452	SRPX2;CCK
55	Microvessel	3/23	0.00410566	0.0474017	10.4761	57.57	MMP9;KNG1;ABCG2
56	Hip	6/107	0.00432039	0.0489902	4.1763	22.7375	NOTCH1;AMIGO2;IGF1;ZDHHC2;GDF5;ASPN
57	Cartilage	3/24	0.00464324	0.0516302	9.9767	53.5982	LUM;TNC;ASPN
58	Vascular system	23/894	0.00471583	0.0516302	1.89925	10.1739	POSTN;SERPINE2;MCAM;AMIGO2;FHL1;BPGM;THBS1;ASPN;DCN;CTGF;DAB2;ALCAM;SFRP2;SRPX2;PPP1R3C;OGN;SPARCL1;ITGBL1;CPE;FAM43A;PAM;CD34;TGM2
59	Prepuce	4/49	0.00517048	0.0539612	6.22222	32.7587	CDSN;DUSP1;PTX3;IFIT3
60	Peripheral nervous system	8/186	0.00531813	0.0539612	3.16992	16.5997	KCNH5;RAMP3;AGPAT9;MCAM;ARHGAP36;SEPP1;FAM107B;ABCG2
61	Clonei	2/8	0.00535363	0.0539612	23.2144	121.411	LXN;NLRP2
62	imr5	2/8	0.00535363	0.0539612	23.2144	121.411	EFNB2;MYCN
63	Mantle muscle	2/8	0.00535363	0.0539612	23.2144	121.411	GJB4;GJB3
64	Submucosa	4/51	0.00596489	0.0591829	5.95684	30.5101	SEMA5A;VIP;CD34;KNG1
65	Mast cell	7/154	0.00666184	0.064193	3.35183	16.7972	IL1RL1;IL33;NGF;VIP;CD34;MMP9;KNG1
66	Microglia	2/9	0.00681876	0.064193	19.897	99.2479	TREM2;CX3CL1
67	Intervertebral disc	4/53	0.00683662	0.064193	5.71312	28.4826	LUM;NGF;GDF5;DCN
68	Ganglion	11/323	0.00687422	0.064193	2.49664	12.4332	PER2;SNAP25;NOTCH1;P2RX3;CPE;SLC17A7;CCK;IGF1;NGF;VIP;KNG1
69	Swiss-3T3 cell	3/28	0.00720732	0.0663282	8.37872	41.3294	IGF1;GRPR;KNG1
70	Endothelial cell	4/55	0.00778868	0.0706545	5.48852	26.6472	IL33;PTX3;THBS1;TGM2
71	AtT-20 cell	3/29	0.00795539	0.0707144	8.05606	38.9422	SCG5;CPE;PAM
72	Trachea	22/882	0.00801802	0.0707144	1.83398	8.85091	DDR1;SCARA5;MCAM;FHL1;LOXL4;LPL;ASPN;DCN;HID1;CTGF;FAM107B;ALDH3A1;ALCAM;SFRP2;PPP1R3C;OGN;PDK4;CYP1B1;TXNIP;SPARCL1;PAM;TGM2
73	Trophoblast	7/161	0.00841835	0.0724561	3.19833	15.2795	IL11;TGFB2;GJB3;IGF1;PAM;MMP9;ABCG2
74	Tail fin	2/10	0.0084437	0.0724561	17.409	83.1164	THRB;CHRD
75	MG-63 cell	3/30	0.00874753	0.0737266	7.75729	36.7617	SPP1;IGF1;MMP9
76	Long bone	4/57	0.00882397	0.0737266	5.28087	24.98	SPP1;COL10A1;IGF1;GDF5
77	BTO:0000868	3/31	0.00958426	0.0780257	7.47986	34.7637	TNC;SPP1;LPL
78	Trigeminal nerve	3/31	0.00958426	0.0780257	7.47986	34.7637	P2RX3;SLC17A7;NGF
79	ATDC-5 cell	2/11	0.0102236	0.08115	15.4739	70.9177	COL10A1;SOX5
80	Sclera	2/11	0.0102236	0.08115	15.4739	70.9177	LUM;DCN
81	adipose-derived stem cell	3/33	0.0113934	0.0893185	6.9805	31.2358	MCAM;SPP1;CD34
82	Monocytic leukemia cell	2/12	0.0121538	0.0929841	13.9258	61.4143	CASP4;MMP9
83	Stellate cell	2/12	0.0121538	0.0929841	13.9258	61.4143	CD34;CTGF
84	Decidua	3/34	0.0123666	0.0934855	6.75498	29.673	IL11;TGFB2;FST
85	Marrow	5/98	0.0131484	0.0982264	3.76767	16.3195	IL11;ANPEP;SPP1;IGF1;CD34
86	Secretory cell	3/35	0.013386	0.0988385	6.54355	28.2259	UNC13B;NOTCH1;RAB27B
87	Outer ear	2/13	0.0142297	0.10386	12.6592	53.8322	NOTCH1;EYA1
88	Pancreatic beta cell	4/68	0.0161195	0.116041	4.37077	18.0413	SNAP25;MAF;TXNIP;RAPGEF3
89	Breast cancer cell line	8/227	0.0164412	0.116041	2.57106	10.5618	NOTCH1;GADD45A;IRS1;CYP1B1;IGF1;MMP9;ABCG2;WISP2
90	Epithelial stem cell	2/14	0.0164467	0.116041	11.6037	47.6635	KRT15;ABCG2
91	Notochord	3/38	0.0167243	0.116702	5.98176	24.4708	FST;CHRD;GLI1
92	Muscle stem cell	2/15	0.0188004	0.128369	10.7105	42.5623	NOTCH1;IGF1
93	Myelocyte	2/15	0.0188004	0.128369	10.7105	42.5623	ANPEP;CD34
94	SH-SY5Y cell	4/72	0.0194905	0.131664	4.11283	16.1956	CASP12;MYCN;IGF1;NGF
95	Orbit	3/41	0.0204865	0.136936	5.50868	21.4177	NOTCH1;CISH;CD34
96	Immature cell	2/16	0.0212866	0.140802	9.94498	38.285	ANPEP;CD34
97	Callus	3/42	0.0218353	0.142943	5.36716	20.5252	SPP1;IGF1;GDF5
98	Saphenous vein	2/17	0.023901	0.148795	9.28151	34.6556	MMP9;KNG1
99	Tear gland	2/17	0.023901	0.148795	9.28151	34.6556	CDSN;RAB27B
100	UMR-106 cell	2/17	0.023901	0.148795	9.28151	34.6556	SPP1;IGF1
101	Wing disc	2/17	0.023901	0.148795	9.28151	34.6556	NOTCH1;GPC1
102	Jugular vein	2/17	0.023901	0.148795	9.28151	34.6556	CCK;KNG1
103	Peripheral nerve	6/157	0.0252114	0.153782	2.7863	10.2549	P2RX3;SLC17A7;CCK;IGF1;NGF;KNG1
104	Neural stem cell	5/116	0.0253249	0.153782	3.1538	11.5933	MYCN;NOTCH1;IGF1;GLI1;KLF4
105	Molting gland	2/18	0.0266394	0.153782	8.70097	31.5442	PPP1R3C;PAM
106	Bile	2/18	0.0266394	0.153782	8.70097	31.5442	VNN1;ANPEP
107	Chondrocyte	2/18	0.0266394	0.153782	8.70097	31.5442	PLD1;CTGF
108	Cement gland	2/18	0.0266394	0.153782	8.70097	31.5442	FST;CHRD
109	Venom gland	2/18	0.0266394	0.153782	8.70097	31.5442	SRPX2;KNG1
110	Limb bud	2/18	0.0266394	0.153782	8.70097	31.5442	CRABP1;GDF5
111	Neuroblast	3/48	0.0309227	0.1769	4.65012	16.165	NOTCH1;MYCN;NGF
112	BTO:0001239	2/20	0.0324723	0.180021	7.73341	26.5053	ITIH2;KNG1
113	Adult liver stem cell	2/20	0.0324723	0.180021	7.73341	26.5053	FOXL1;CD34
114	Egg yolk	2/20	0.0324723	0.180021	7.73341	26.5053	TMEM176B;CHRD
115	Conjunctiva	3/49	0.0326022	0.180021	4.5488	15.5722	KRT15;MMP9;ABCG2
116	Mouth	23/1073	0.0338243	0.185159	1.56051	5.28477	DDR1;RNF43;POSTN;MCAM;FHL1;HSPB7;TNC;LPL;SULF1;MTSS1;ASPN;CTGF;MYO1D;ALDH3A1;ALCAM;PPP1R3C;KRT15;DPYSL3;RBP1;SPARCL1;FAM43A;PAM;TGM2
117	Spike	4/86	0.0345374	0.186433	3.40821	11.4711	CACNA1I;NOTCH1;CDSN;CCK
118	Uterus	197/12771	0.0346443	0.186433	1.27136	4.27511	SERPINE2;COL12A1;ZDHHC2;IFIT3;ALCAM;FAM110C;EVA1C;ANPEP;DPYSL3;PDK4;CYP1B1;SOX5;PAQR8;UNC13B;OMD;ANK3;DKK2;SYTL2;CPED1;SFRP1;SFRP2;RBP2;PPP1R3C;SDPR;RBP1;TXNIP;SPARCL1;FAR1;AGTR2;PTGFR;LXN;IL20RA;ACTR3B;KALRN;PGBD5;S100A16;FAM43A;HIVEP3;ST3GAL1;FZD1;GADD45A;MCAM;IGF1;SMARCA1;VNN1;PKIA;PDE3A;ITGBL1;CPEB3;PAM;DDR1;GLI1;CX3CL1;C1QTNF1;MMP28;KIF13B;CD34;LMCD1;DUSP4;IL11;DUSP1;HEG1;SPHK1;IL16;SORCS2;M…
119	Chorioallantois	2/21	0.035559	0.188166	7.32602	24.4437	ANGPT1;THBS1
120	GH3 cell	2/21	0.035559	0.188166	7.32602	24.4437	IGF1;VIP
121	Acute lymphoblastic leukemia cell	3/51	0.0361011	0.189456	4.35882	14.4775	NOTCH1;IGF1;CD34
122	3T3-L1 cell	4/88	0.0371116	0.193163	3.32672	10.9576	IRS1;SLC27A6;LPL;IGF1
123	Blastocyst	5/129	0.0375426	0.193818	2.82128	9.26024	DNMT3L;GJB3;FST;IGF1;KLF4
124	Fascia	2/23	0.042054	0.215357	6.62763	21.0016	NOTCH1;CD34
125	Metatarsal bone	2/24	0.0454549	0.230911	6.32605	19.554	AMIGO2;IGF1
126	Peripheral blood	4/96	0.0484846	0.242855	3.03621	9.1891	ANPEP;ARRB1;IL16;ACTR3B
127	Eggshell	2/25	0.0489535	0.242855	6.0507	18.2543	LXN;SPP1
128	MDCK-2 cell	2/25	0.0489535	0.242855	6.0507	18.2543	SYTL2;ABCG2
129	Abdominal adipose tissue	3/58	0.04979	0.243205	3.80271	11.4079	IRS1;LPL;IGF1
130	Somite	3/58	0.04979	0.243205	3.80271	11.4079	EYA1;TNC;GLI1

## Sheet: Table B. MGA
#	Term	Overlap	P-value	Adjusted P-value	Odds Ratio	Combined Score	Genes
1	osteoblast day21	26/264	9.89241e-15	9.10102e-13	8.21521	264.916	MEGF6;COL11A1;COL12A1;AI606473;LTBP2;THBS1;WISP2;CASP12;SRPX2;CYP1B1;COL10A1;CTHRC1;FZD1;IL33;POSTN;LUM;OMD;IGF1;ASPN;BICC1;H19;SMOC2;SFRP1;SFRP2;OGN;ITGBL1
2	osteoblast day14	26/301	2.20268e-13	1.01323e-11	7.09638	206.817	COL11A1;COL12A1;GPR85;LTBP2;AI606473;THBS1;WISP2;CASP12;SRPX2;CYP1B1;COL10A1;HAS2;DACT1;CTHRC1;FZD1;POSTN;EYA1;LUM;ASPN;BICC1;H19;SMOC2;SFRP1;SFRP2;OGN;ITGBL1
3	osteoblast day5	15/175	3.33001e-08	1.0212e-06	6.78993	116.907	IL11;MEGF6;COL11A1;TNC;LOXL4;SULF1;THBS1;CTGF;WISP2;EFNB2;TNN;GM2115;HAS2;PTX3;CTHRC1
4	umbilical cord	15/208	3.22908e-07	7.42689e-06	5.61946	83.9879	POSTN;TGFB2;LUM;COL12A1;ITGA1;TNC;MSLN;DKK2;DCN;SULF2;H19;ROR1;ASB4;AGTR2;WNT2
5	MEF	14/300	0.000110321	0.00202991	3.50948	31.9788	TGFB2;MCAM;COL12A1;TNC;LTBP2;SORCS2;THBS1;CTGF;EFNB2;SDPR;DPYSL3;FIBIN;SLIT2;PHLDB2
6	3T3-L1	10/181	0.000280578	0.0043022	4.15609	33.9912	CDSN;P2RX3;GM2115;TMEM176A;LOXL4;CYP1B1;PTN;SLIT2;GRPR;CXCL5
7	uterus	8/141	0.000952192	0.0125145	4.25222	29.5816	SEMA5A;SMOC2;MAF;RAMP3;ASPG;DIO2;GLI1;TGM2
8	C3H 10T1 2	8/155	0.00174501	0.0200676	3.8445	24.4164	CDSN;PDLIM2;SCARA5;OMD;RSPO2;LOXL4;PTX3;PTN
9	cornea	12/427	0.0199925	0.204368	2.04422	7.9978	DDR1;ALDH3A1;ABLIM1;S100A16;KIF13B;TREM2;PHACTR1;SULF1;KLF4;SOX5;TGM2;MFAP3L
10	mammary gland non-lactating	7/201	0.0254689	0.234314	2.53369	9.2994	PPP1R3C;IRS1;PKIA;COL5A3;FHL1;PDK4;LMCD1
11	mast cells	13/515	0.0339872	0.278608	1.82922	6.186	CISH;TUSC1;RAB27B;AHR;SMARCA1;MTSS1;IL1RL1;GLRA3;GRK5;FAM110C;HIVEP3;LY6A;CD34
12	mast cells IgE+antigen 1hr	8/265	0.0367156	0.278608	2.18663	7.22584	FGD3;MYO1D;CISH;FAM110C;C430002N11RIK;2010111I01RIK;MTSS1;ADAMTS6
13	retinal pigment epithelium	12/473	0.0393686	0.278608	1.83586	5.93861	DUSP4;2610035D17RIK;ENPP2;CHRD;SLC16A9;GDPD5;SULF1;VAMP5;RAPGEF3;SOX5;OSBP2;MFAP3L
14	nucleus accumbens	10/383	0.0486316	0.319579	1.88564	5.70121	ALCAM;RGS20;PHACTR1;KCNAB1;ANK3;PDE8B;KALRN;CX3CL1;CAMK1G;LHX8

[truncated: 8 more sheets: Table B. MGI, Table B. Wiki Mouse, Table B. Wiki Human, Table B. GO, Table B. GWAS, Table B. Localisation, Table C. Fox, Fos-Jun sites, Table D. Expression databases]
