# Supplementary figures and images for: Mechanistic insights into transcriptional regulation of ARHGAP36 expression identify a factor predictive of neuroblastoma survival
Source: eLife journal article supplement (doi:10.7554/elife.108827), 2025-10-31

**Figures 5B and S9A:**

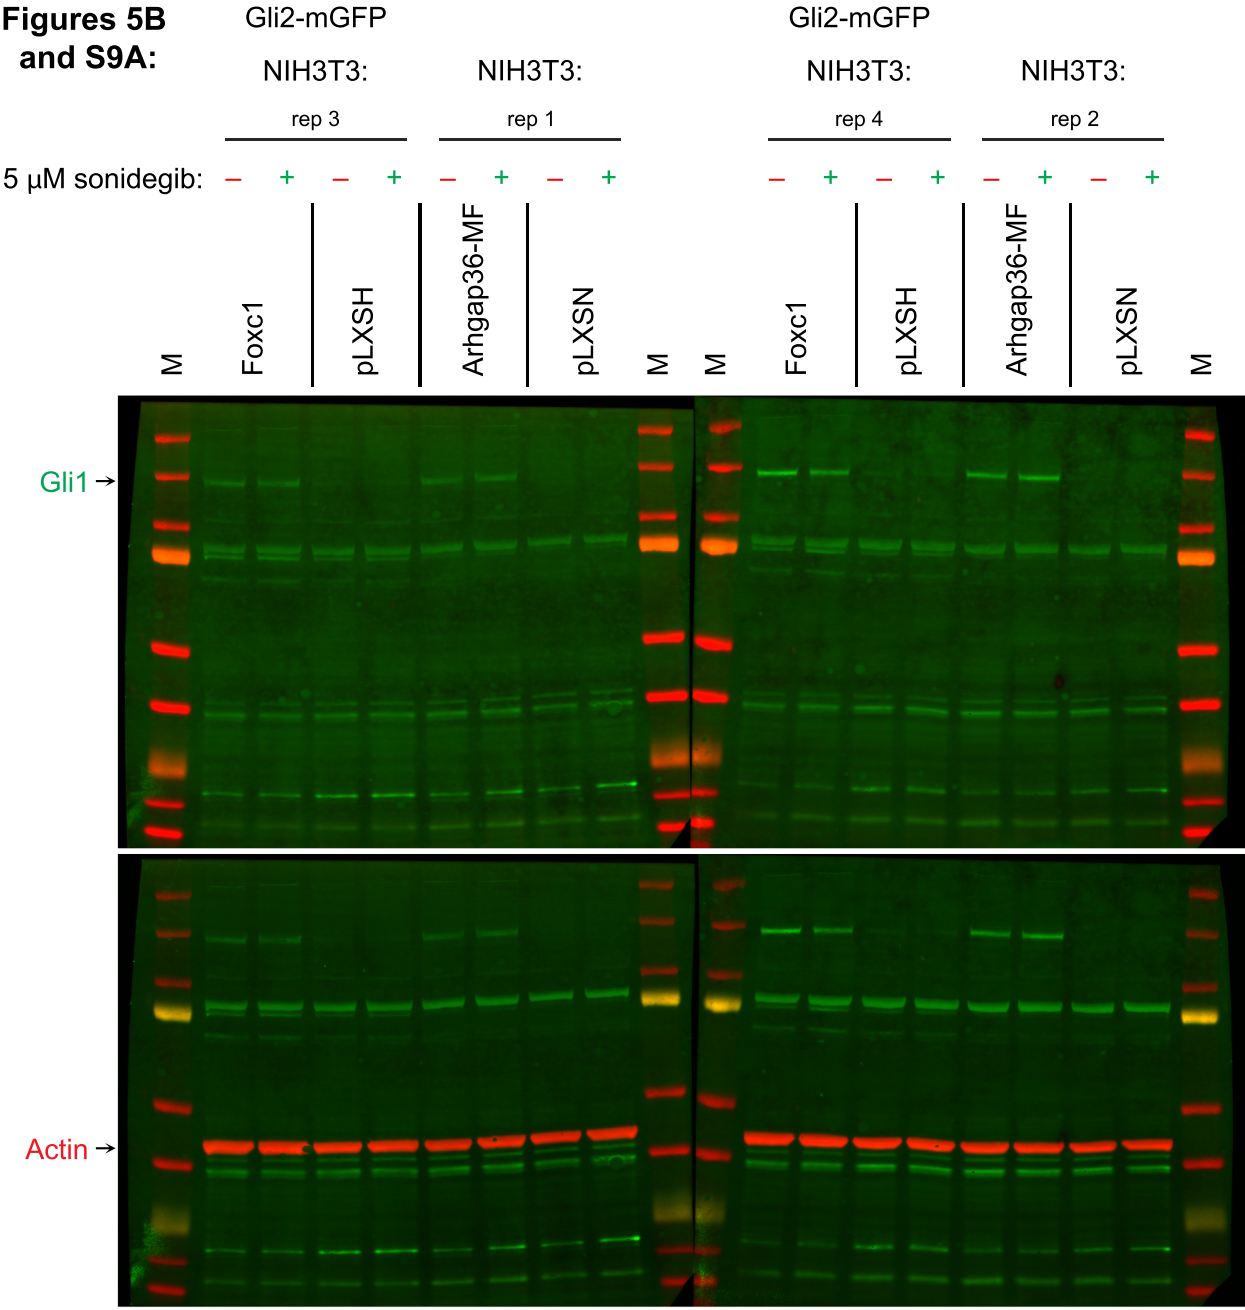

- Markers (M):**
- 250 kDa
  - 150 kDa
  - 100 kDa
  - 75 kDa
  - 50 kDa
  - 37 kDa
  - 25 kDa
  - 20 kDa
  - 15 kDa

Supplement: app1-fig9-data1 [file Figure S9-source data 1.pdf › Figure S9-source data 1.pdf]

**Figure 1C:**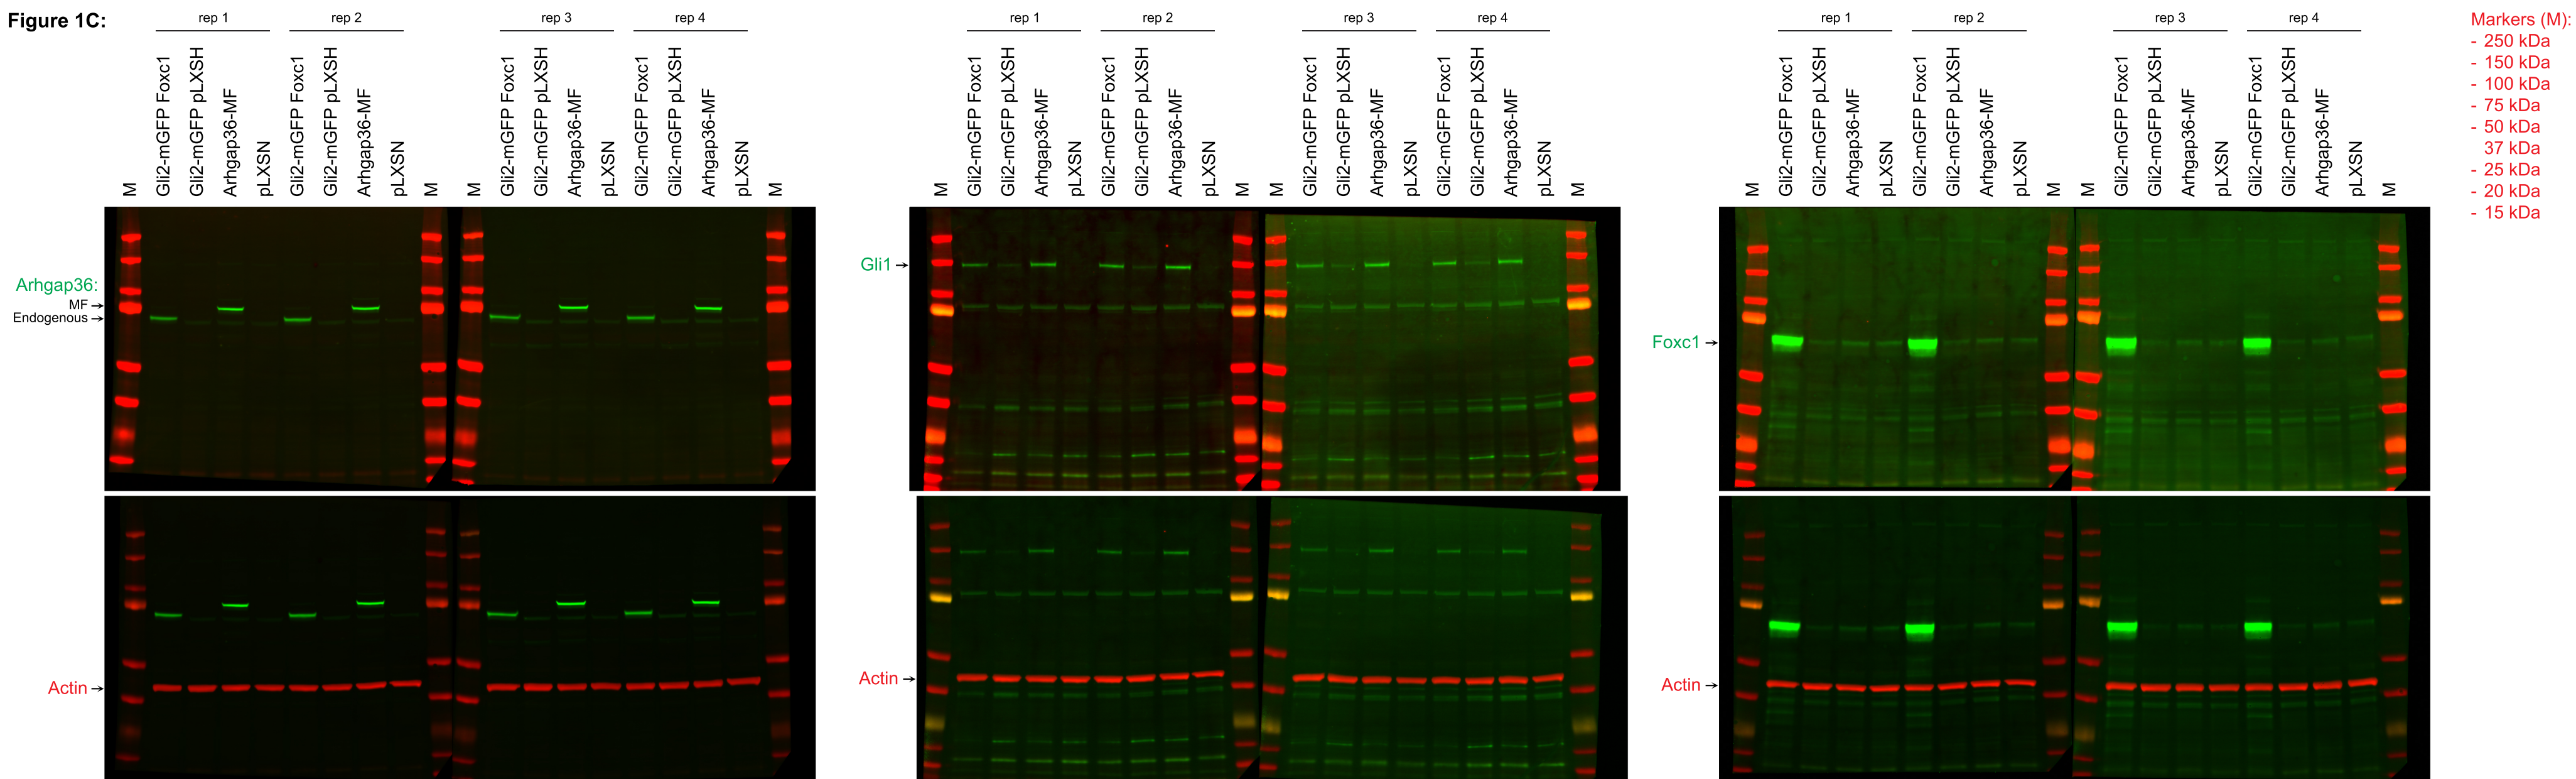

Supplement: fig1-data1 [file Figure 1-source data 1.pdf › Figure 1-source data 1.pdf]

**Figure 3A:**

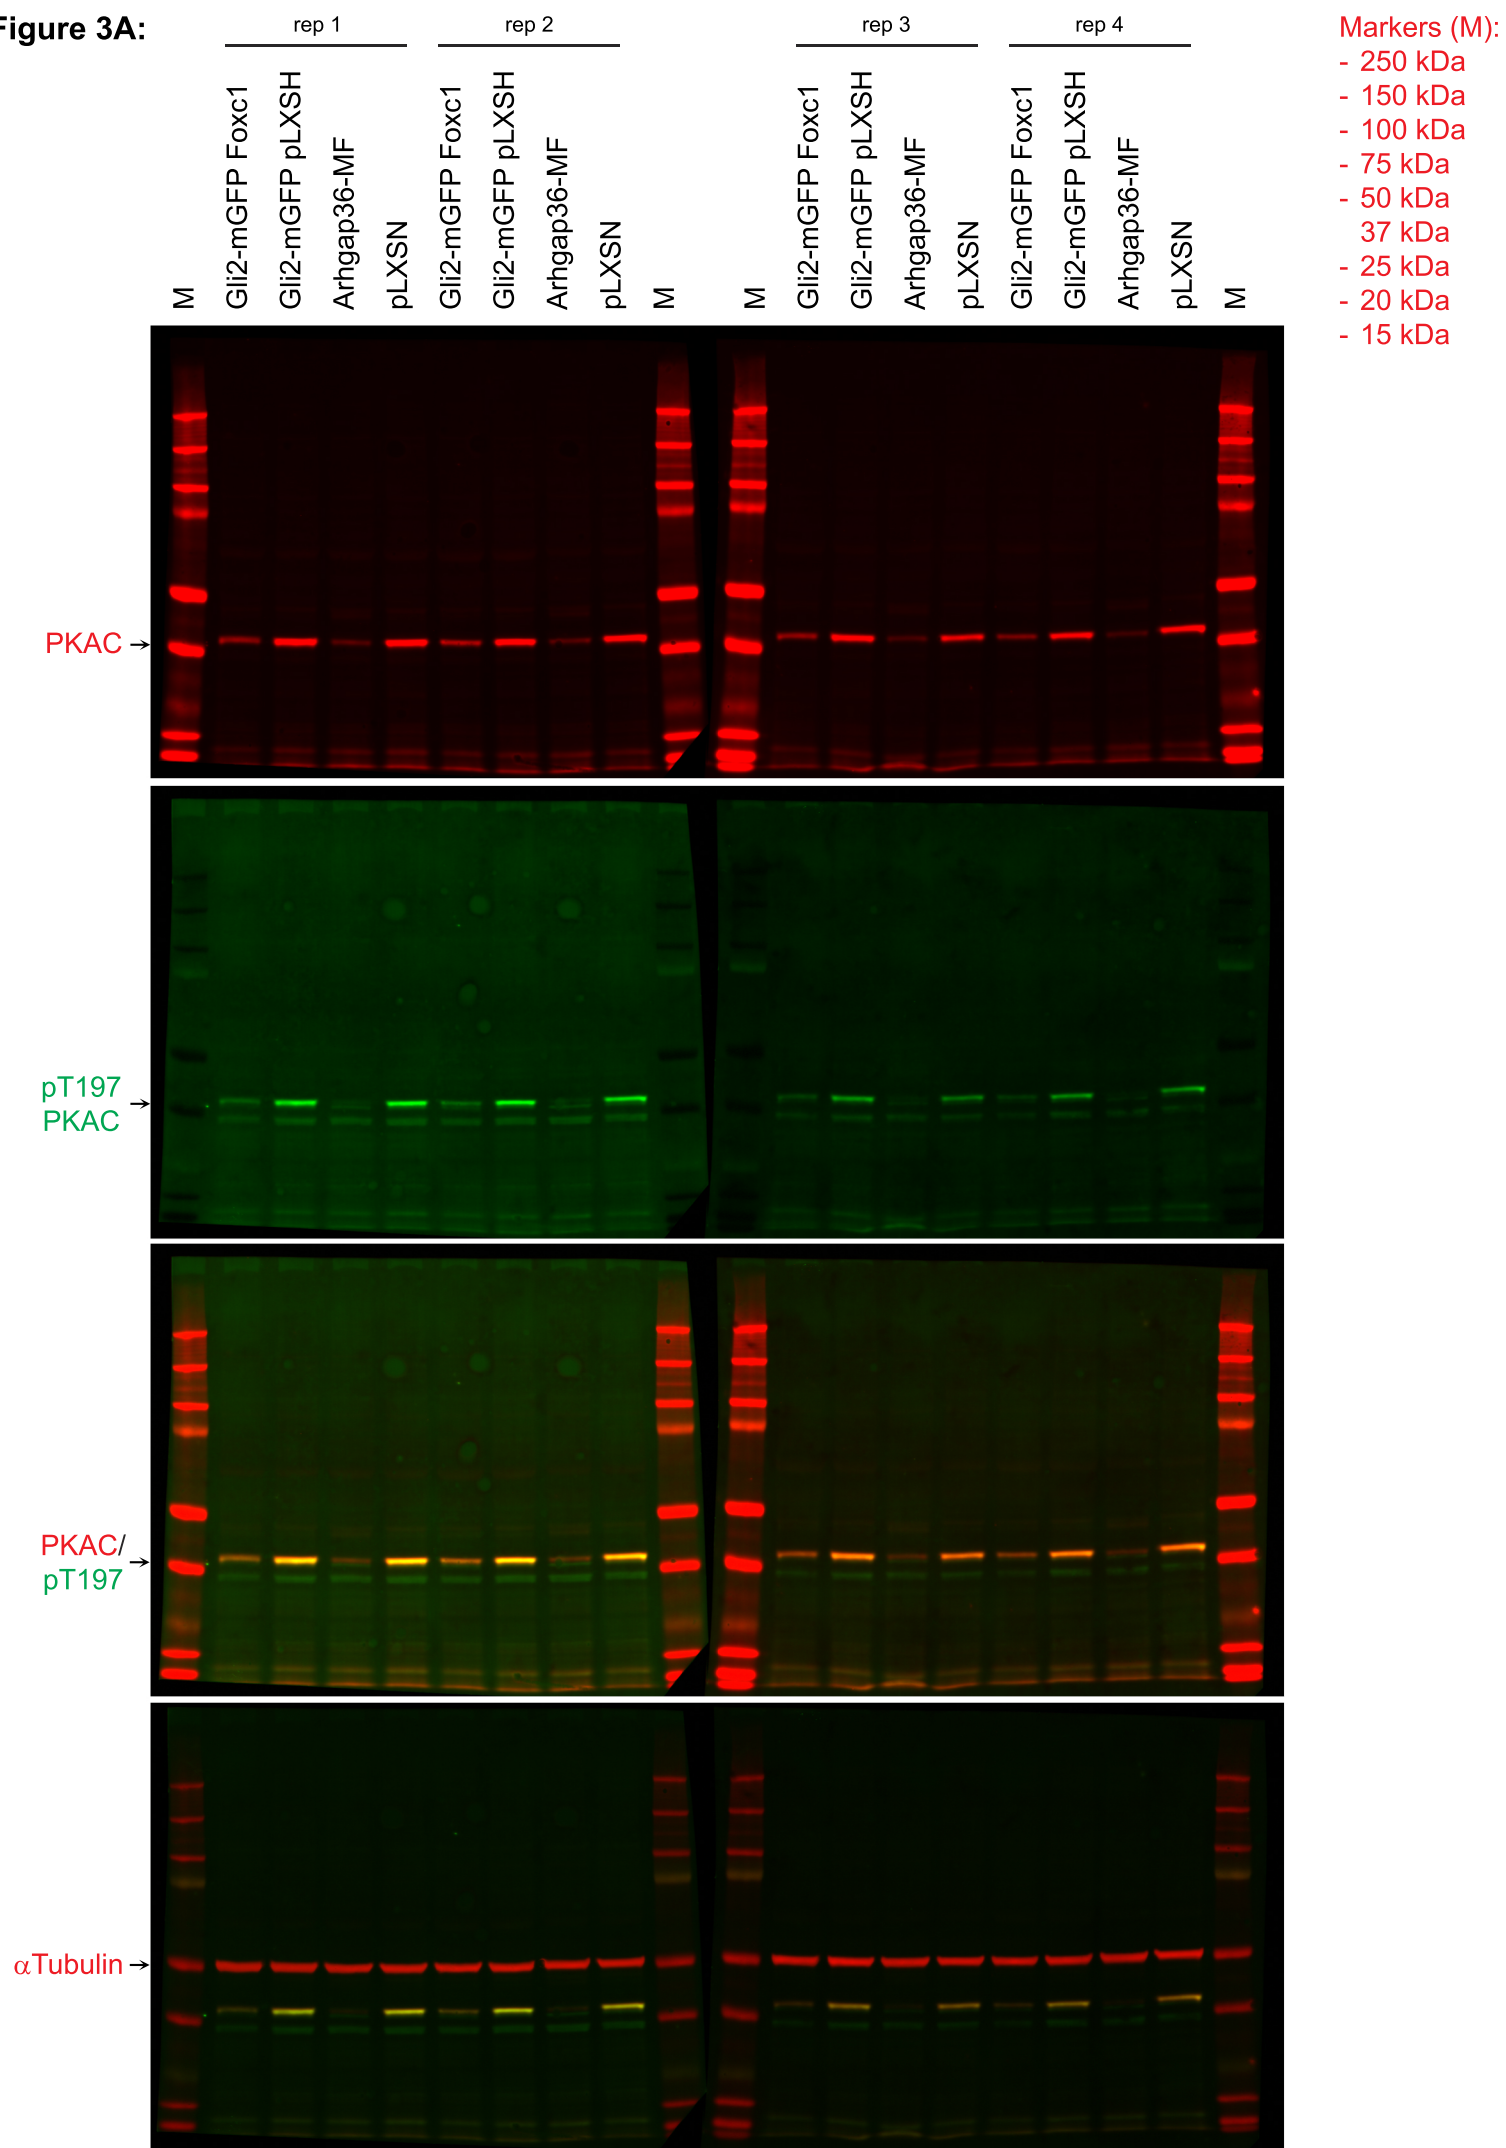

Supplement: fig3-data1 [file Figure 3-source data 1.pdf › Figure 3-source data 1.pdf]

Figure 4B:

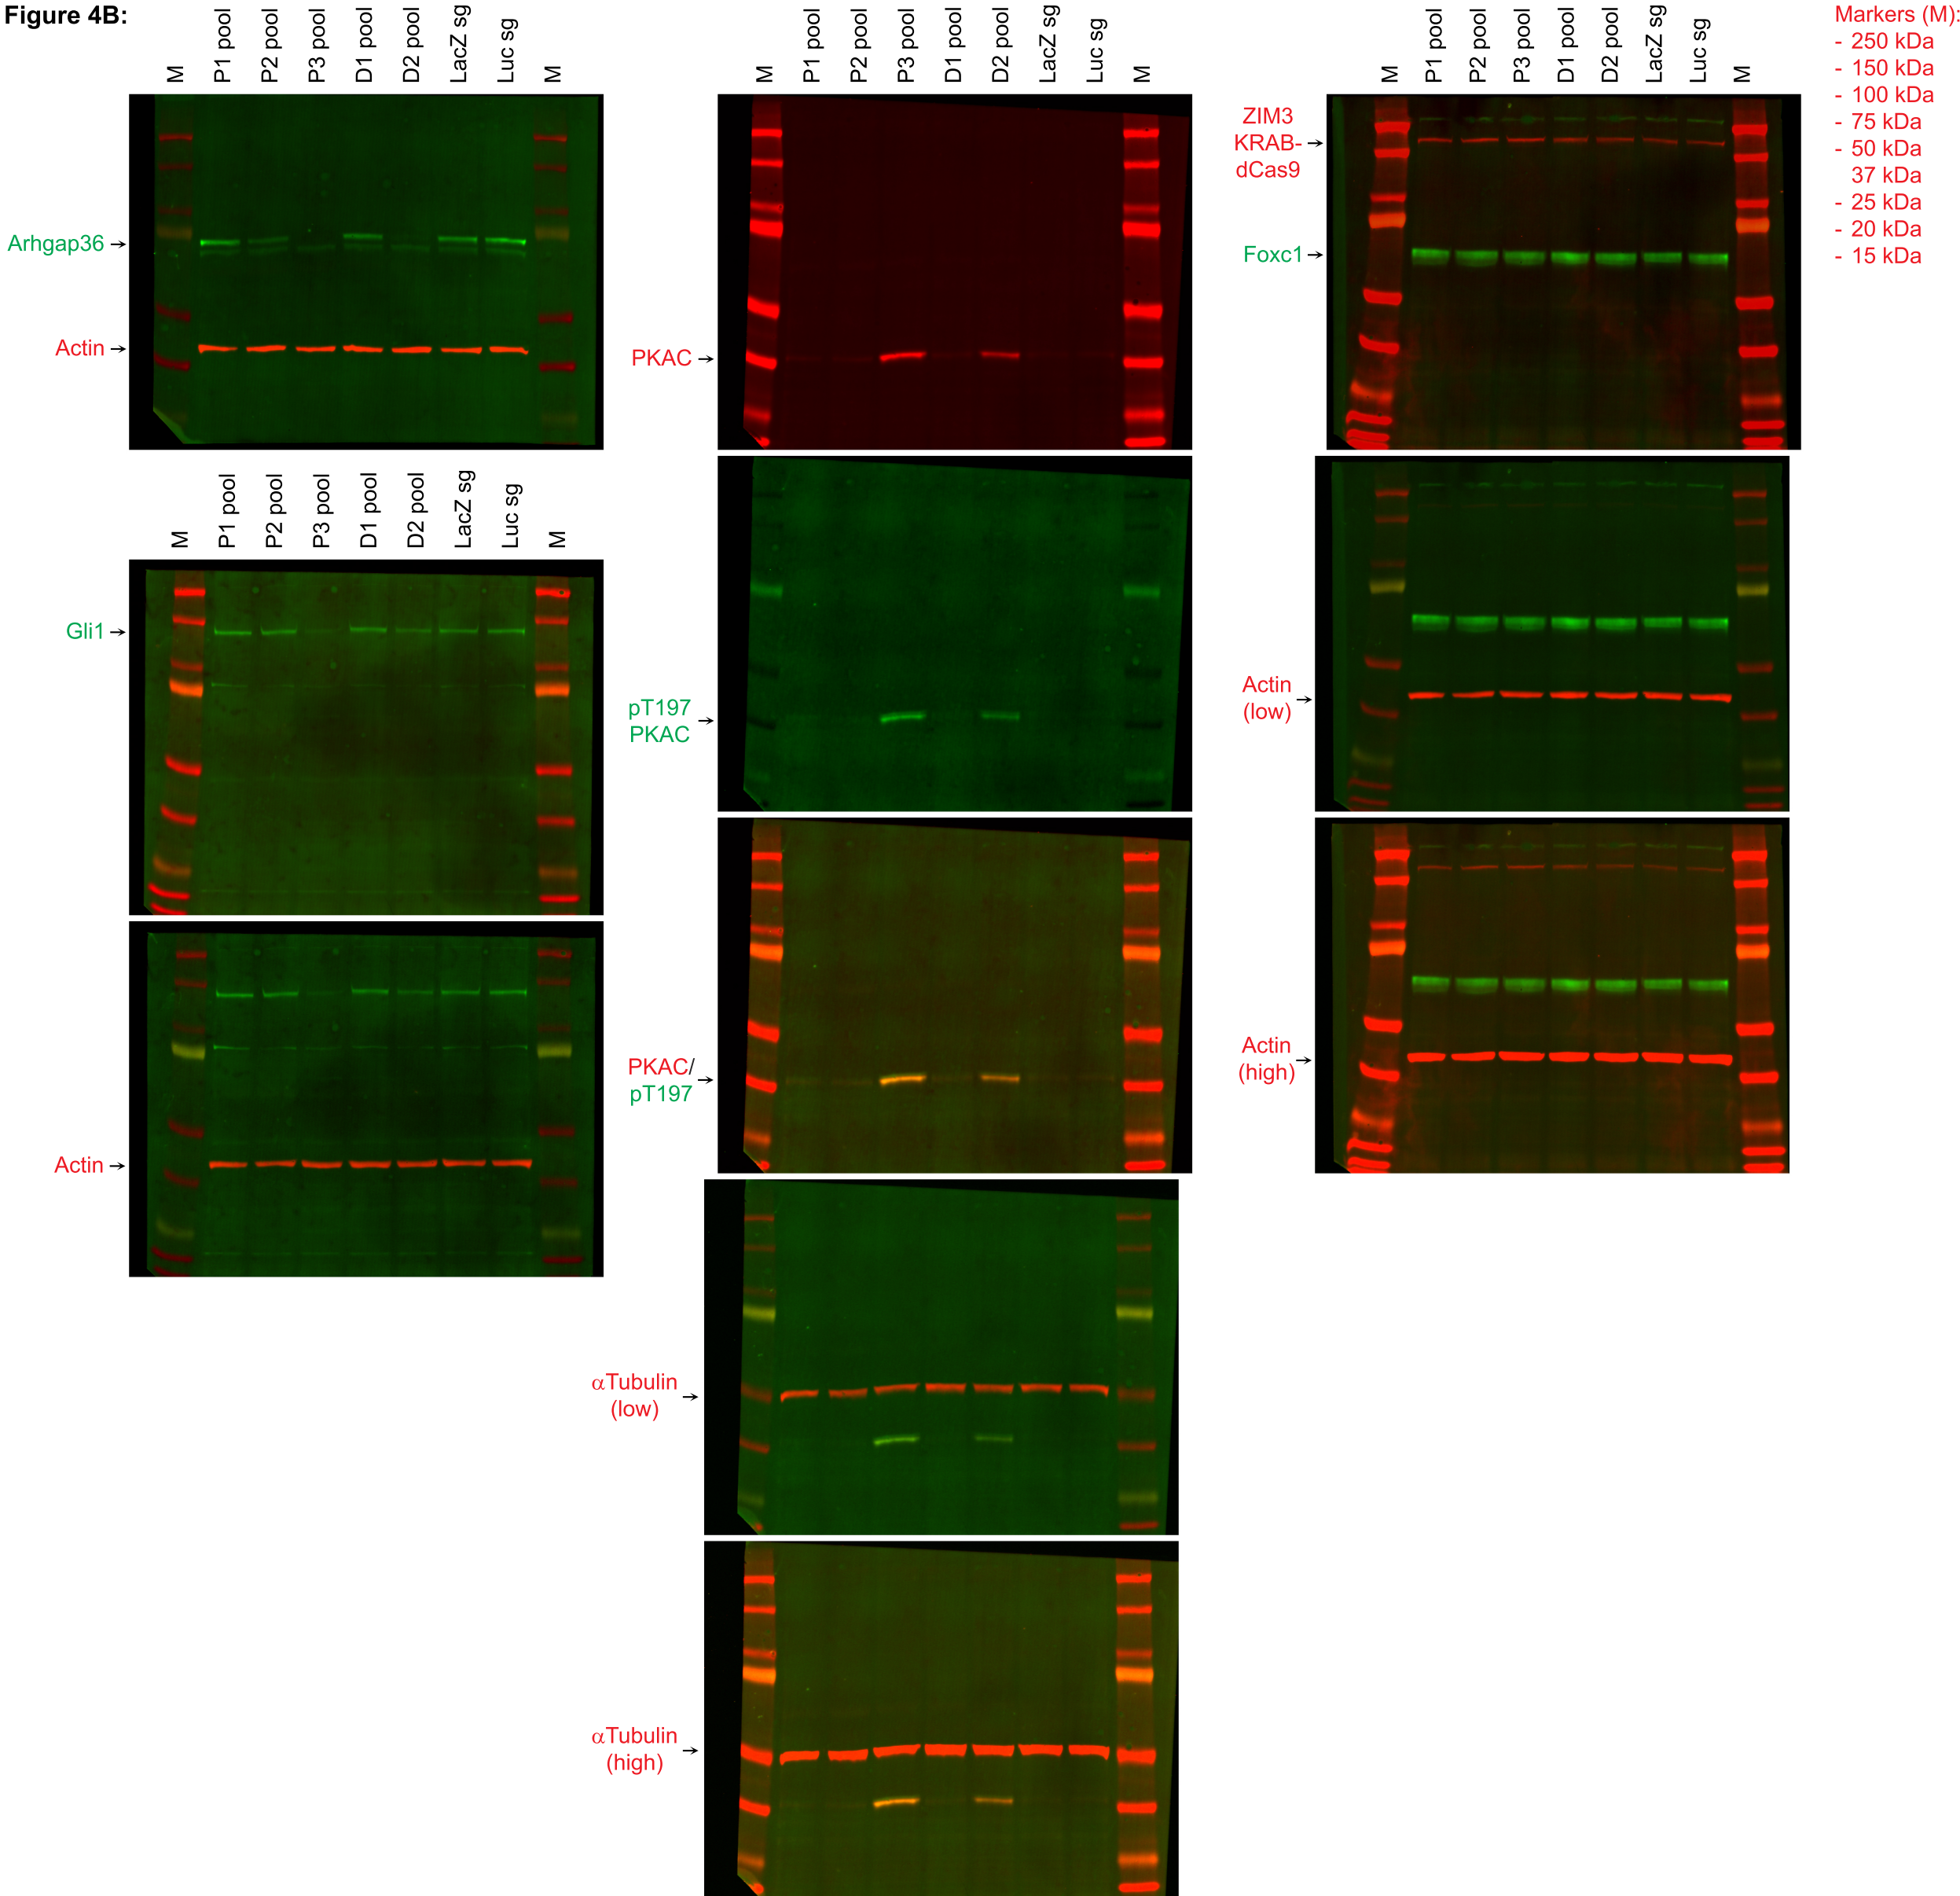

Supplement: fig4-data1 [file Figure 4-source data 1.pdf › Figure 4-source data 1.pdf]

**Figure 5B:**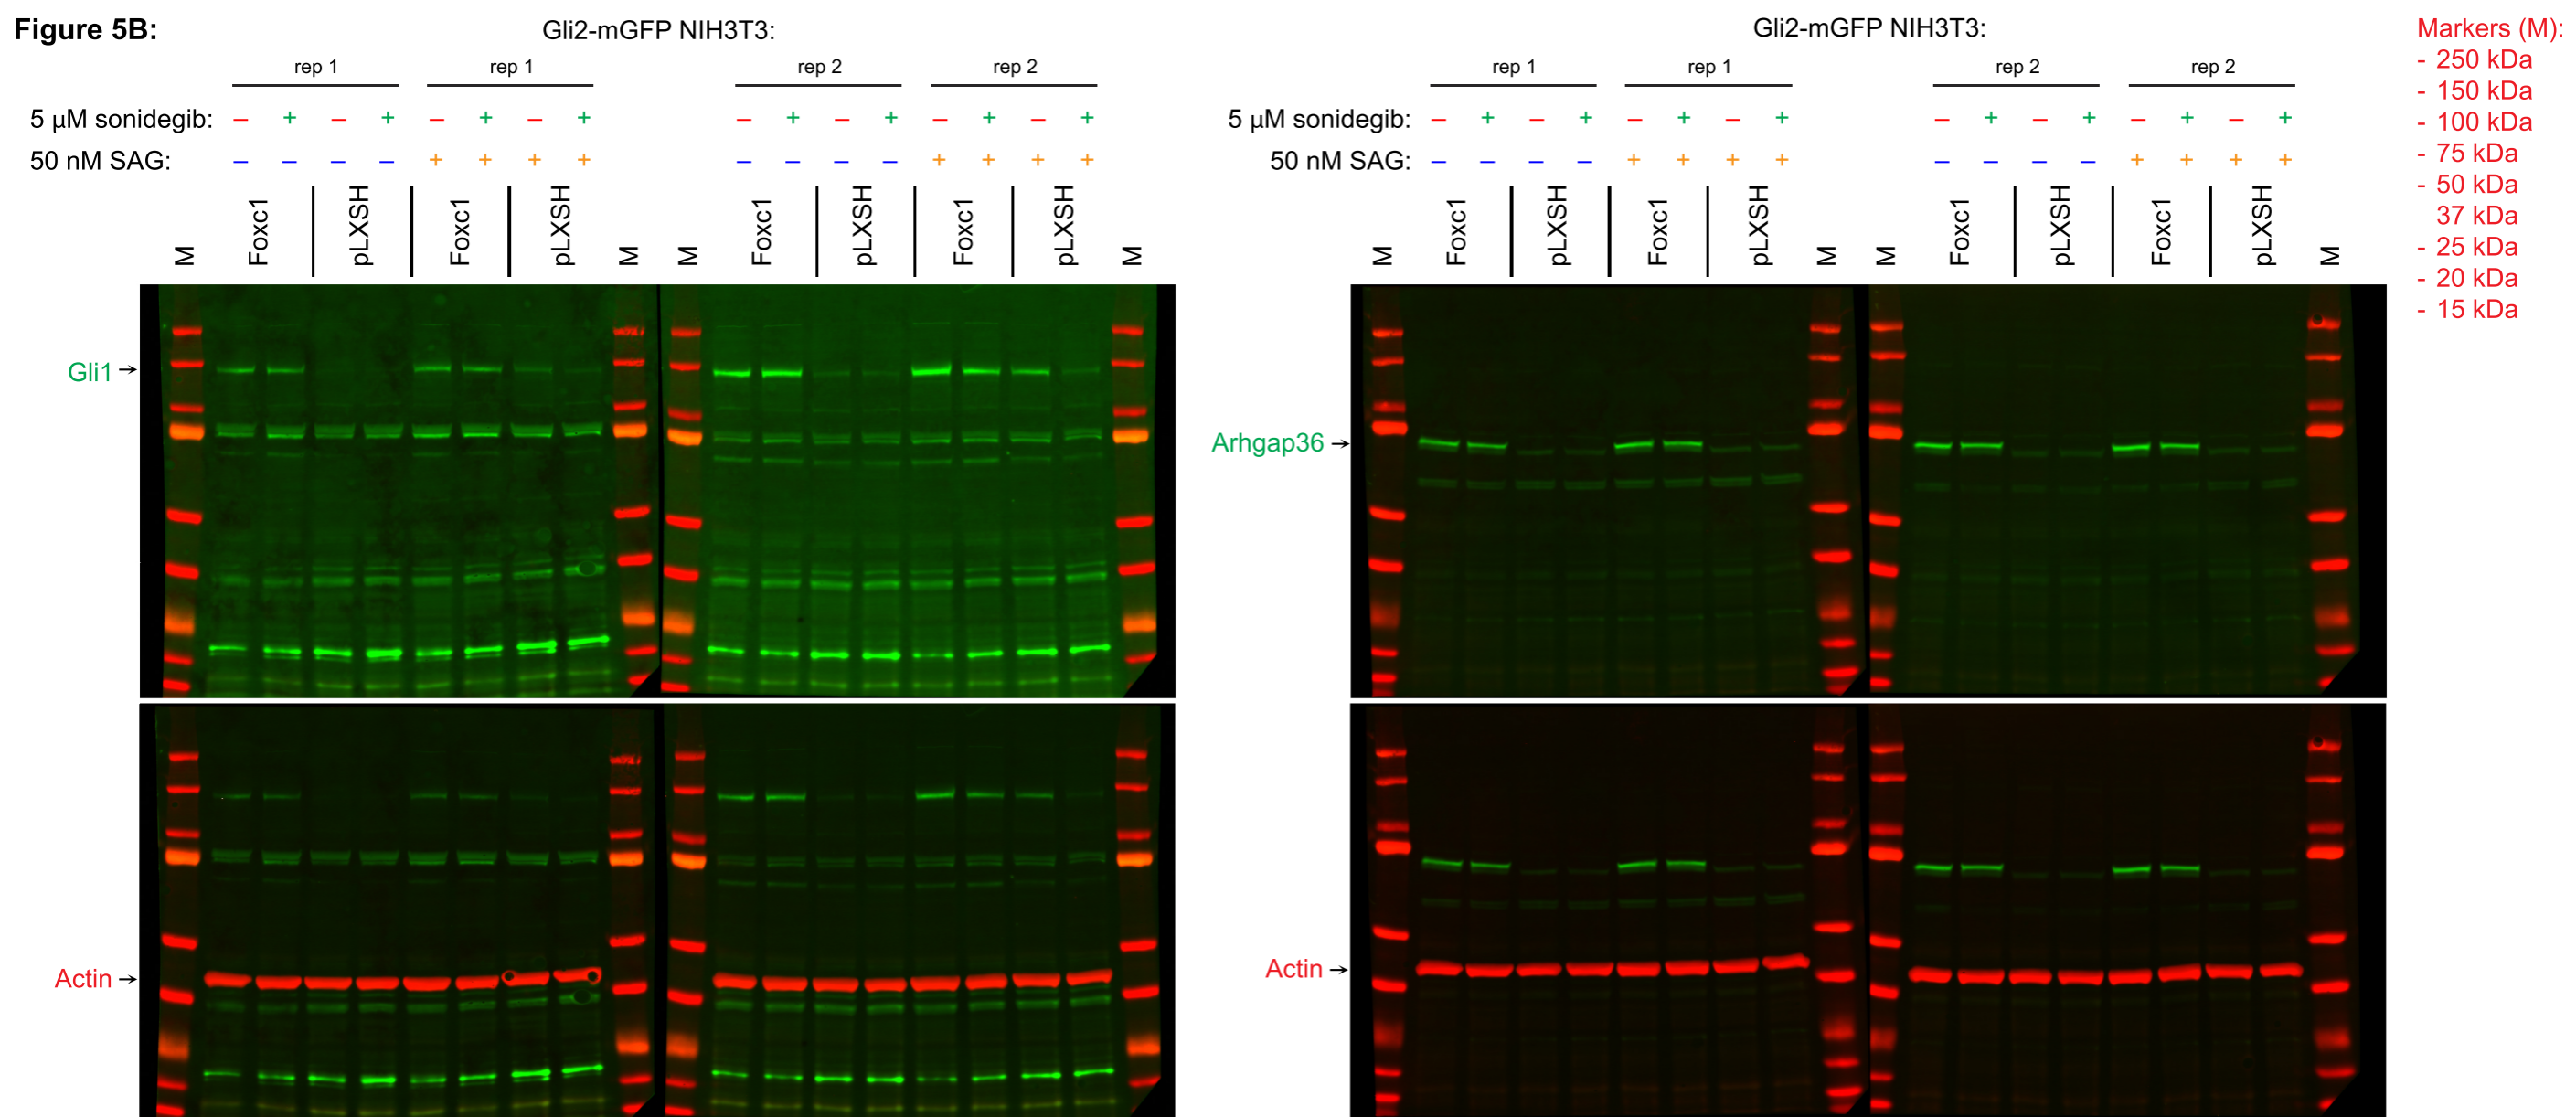**Figures 5B and S9A:**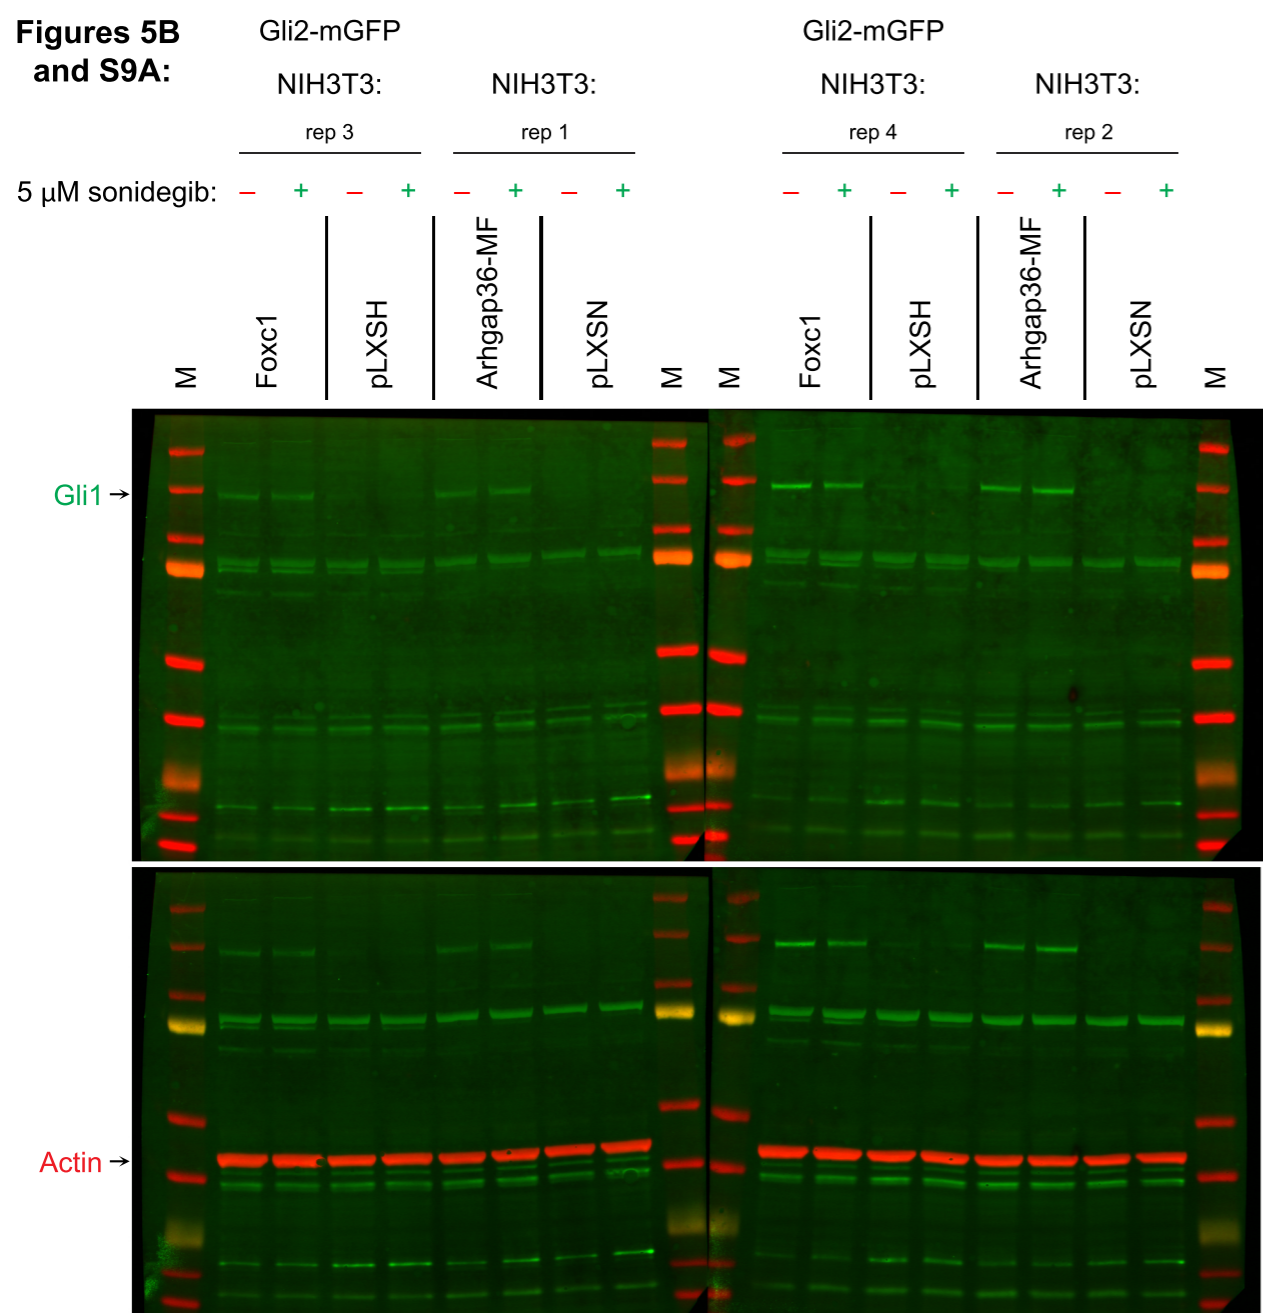

Supplement: fig5-data1 [file Figure 5-source data 1.pdf › Figure 5-source data 1.pdf]

**Figure 6D:**

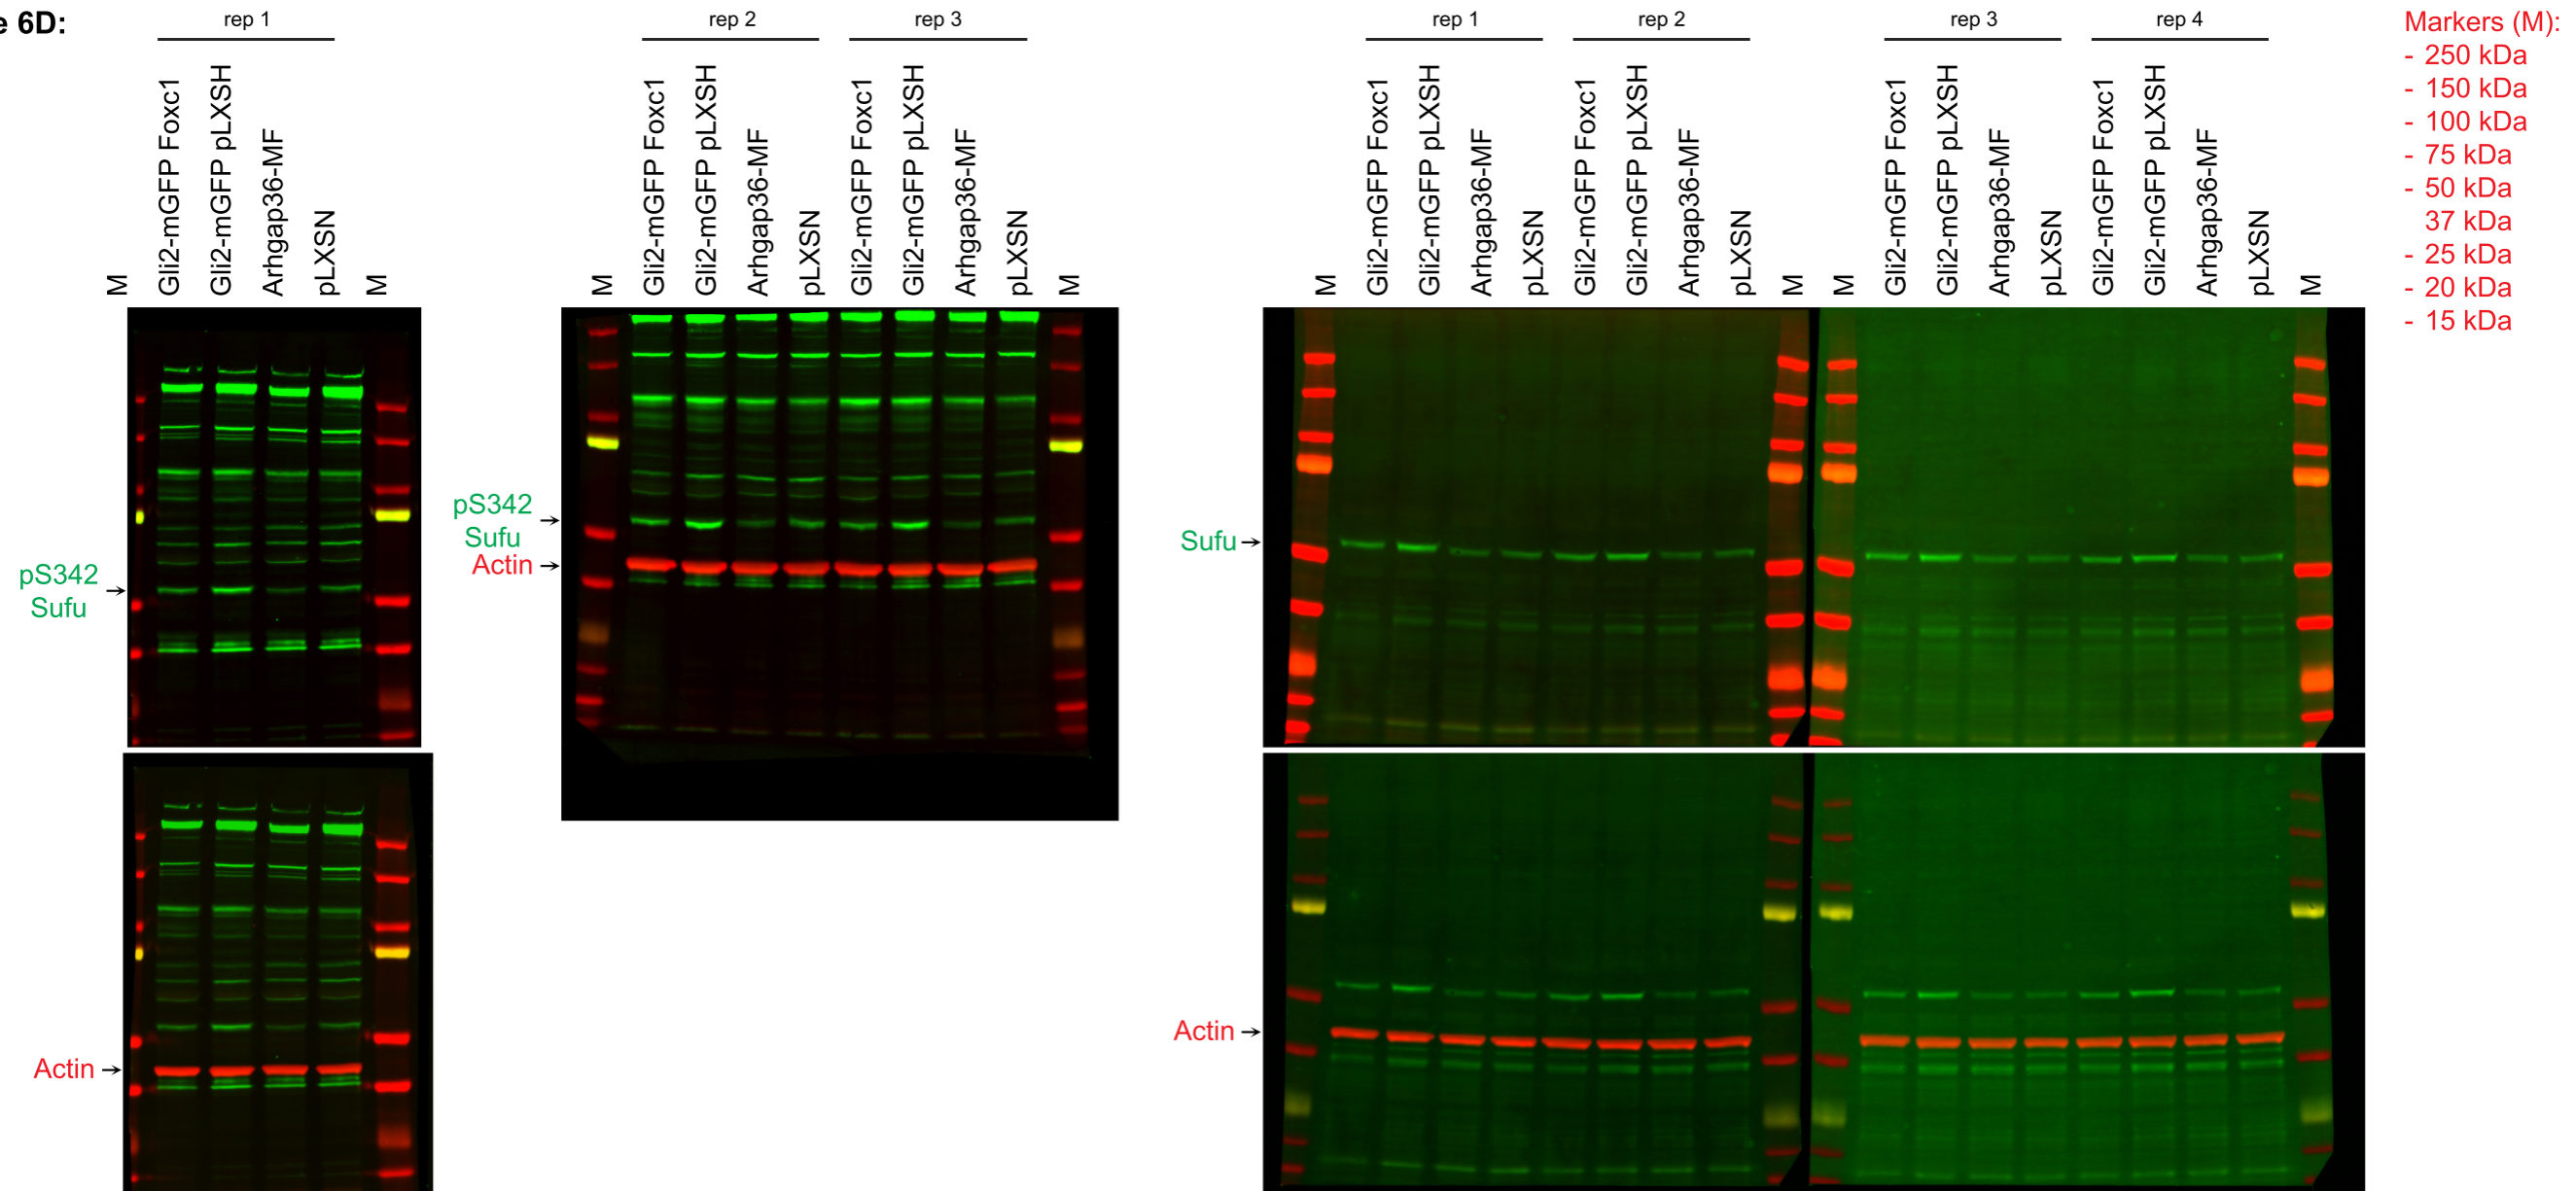

Supplement: fig6-data1 [file Figure 6-source data 1.pdf › Figure 6-source data 1.pdf]
